# Supplementary material for: Male manipulation impinges on social-dependent tumor suppression in Drosophila melanogaster females
Source: Sci Rep. 2024 Mar 17;14:6411. doi: 10.1038/s41598-024-57003-3 (PMC10944827; doi:10.1038/s41598-024-57003-3)
Supplement: Supplementary file 4 — Supplementary Table S3. [file 41598_2024_57003_MOESM4_ESM.xlsx]

## Sheet: Feuil1
ID	baseMean	log2FoldChange	lfcSE	stat	pvalue	padj	Virgin_alone_rep1	Virgin_alone_rep2	Virgin_alone_rep3	Virgin_hetero_rep1	Virgin_hetero_rep2	Virgin_hetero_rep3
FBgn0037612	635.40941328746	-0.88715411424926	0.15930403540232	-5.56893685717856	2.56298337422659e-08	0.00024794301162268	1192.34996271541	999.544647685433	753.007735141904	644.382167170577	521.185172969523	426.891270295591
FBgn0032638	200.716851732592	-4.16926580594814	1.04182931767036	-4.0018703018178	6.28437460344276e-05	0.303975199568526	1326.1258121908	118.532090489493	759.941508025347	65.9603793166732	33.9376391701084	22.5272438150708
FBgn0001233	17424.6192601706	0.329964171753064	0.0898205112250753	3.67359489778709	0.00023916179708143	0.610902594931726	7601.95805497095	6974.01790101159	7837.9368674439	8382.04204854955	10359.4643566756	9433.28334756088
FBgn0051198	1813.97292307122	-4.93005966129865	1.36004251173913	-3.62493055823264	0.000289039105976138	0.610902594931726	33.7347794329239	2.27946327864409	0	0	0	1.12636219075354
FBgn0261274	312.989146314208	0.425616626868296	0.119180116310356	3.57120499664517	0.000355342630921753	0.610902594931726	225.674041723698	184.636525570171	217.720468540108	291.240444059772	311.499045239924	239.915146630504
FBgn0040582	269.746339402447	-0.85397408088225	0.240260683937201	-3.55436464630002	0.000378893484555547	0.610902594931726	659.573101326477	425.119901467122	446.534973693726	317.624595786442	236.35141564897	292.85416959592
FBgn0038277	3603.27176928784	-1.94774349915422	0.55655108289717	-3.49966707281403	0.000465839576329746	0.643790294487709	31.4082429203084	7.97812147525431	6.93377288344294	3.04432519923107	1.21205854178959	7.88453533527476
FBgn0052625	66.4686079335456	-1.24547680718992	0.366707468907827	-3.39637698381042	0.00068284243113695	0.825727209852357	18.6122921009235	19.3754378684747	48.5364101841006	15.2216259961554	16.9688195850542	3.37908657226061
FBgn0052373	345.095811806561	0.522345611039936	0.159745165026323	3.26986804861271	0.0010759766243979	1	616.532175843092	589.241257529497	477.043574380874	674.825419162887	899.347438007874	847.02436744666
FBgn0010241	108.7650098197	-0.786221131874256	0.243063549918928	-3.23463198055198	0.00121799613320372	1	109.347216092926	105.99504245695	87.3655383313811	55.8126286525696	61.814985631269	58.5708339191839
FBgn0034756	528.989679878068	-1.13397524594701	0.35409470485315	-3.20246315577436	0.00136257729170736	1	836.389876285251	757.921540149159	1823.58226834549	583.495663185955	556.334870681421	416.754010578809
FBgn0034328	141.617335464195	-1.3776821051176	0.44041099201652	-3.12817375154415	0.00175896165641585	1	478.103253342473	131.069138522035	332.821098405261	139.024184098219	132.114381055065	91.2353374510365
FBgn0037679	169.424770169517	0.42682454649067	0.138836930293239	3.07428683124274	0.00211006455282054	1	115.163557374464	120.811553768137	115.100629865153	158.304910360016	151.507317723698	162.196155468509
FBgn0034662	865.651758318656	-3.82969037503186	1.2482437757895	-3.06806286505185	0.00215451288398648	1	15.1224873320004	1.13973163932204	0	1.01477506641036	0	0
FBgn0034617	173.336267864453	0.626124106654991	0.205110043106312	3.05262529894969	0.00226849002843588	1	50.020535021232	46.7289972122038	45.7629010307234	60.8865039846214	99.3888004267462	61.9499204914446
FBgn0028920	1929.23098617761	-3.82792238962449	1.25591268074269	-3.04792080557768	0.00230430646199879	1	11.6326825630772	3.41919491796613	1.38675457668859	0	0	1.12636219075354
FBgn0035780	16.5884779816601	-3.99672969263414	1.31441728677971	-3.04068558199354	0.00236040177459928	1	4.65307302523088	0	5.54701830675435	0	0	0
FBgn0004431	515.863313438883	-1.6551291672332	0.545717017971386	-3.03294402176769	0.00242180520079395	1	109.347216092926	110.553969014238	270.417142454275	78.1376801135975	54.5426343805314	22.5272438150708
FBgn0266420	468.354386291069	-0.796643464131082	0.263899106284797	-3.01874256167943	0.00253826119038307	1	43.0409254833856	33.0522175403393	73.4979925644952	27.3989267930796	32.7255806283189	24.7799681965778
FBgn0000427	2086.31376261897	-4.01047368540091	1.33408595630763	-3.00615838615135	0.00264571148787037	1	16.2857555883081	0	2.77350915337718	0	1.21205854178959	0
FBgn0032639	20.336816073005	-1.76567342918729	0.596638352558675	-2.95936964429997	0.00308269090407408	1	102.367606555079	31.9124859010172	48.5364101841006	15.2216259961554	21.8170537522126	16.8954328613031
FBgn0034329	581.885039135445	-0.804612278699917	0.272953279164246	-2.94780220689619	0.00320041763596824	1	1243.53376599295	778.436709656956	1069.1877786269	669.751543830836	592.696626935108	506.862985839092
FBgn0040778	49.5649671342391	-0.747340529936118	0.25650678936055	-2.91353118488276	0.00357366141540722	1	59.3266810716937	49.0084604908479	45.7629010307234	33.4875771915418	27.8773464611605	30.4117791503455
FBgn0030551	645.411217422316	-3.7932962500626	1.30707556165169	-2.90212468303606	0.00370640989761858	1	6.97960953784632	1.13973163932204	0	0	0	0
FBgn0027088	610.094592077998	0.290814736633371	0.100486440333689	2.89406944526697	0.00380284045801565	1	380.388719812625	357.875734747122	342.528380442081	447.515804286967	443.613426294989	432.523081249358
FBgn0052773	64.6176390432268	0.599658686059953	0.209759871134467	2.85878649150934	0.00425264907246615	1	112.837020861849	90.0387995064415	72.1112379878066	128.876433434115	135.750556680434	154.311620133235
FBgn0029766	8394.15178810471	-0.98742698881669	0.348571828690021	-2.83277909327203	0.00461452635643988	1	10244.9035333021	10426.2650365181	20704.2458299606	8195.32343633004	7629.90852056545	5042.72352800359
FBgn0036975	428.951105545276	0.3345487978346	0.118163562215775	2.83123487106532	0.00463686578486063	1	727.042660192325	604.057768840683	558.862094405501	782.391576202385	758.748647160282	844.771643065153
FBgn0039130	274.379896372982	-0.360994703281733	0.128598986382428	-2.80713490391135	0.00499843041808935	1	191.939262290774	178.937867373561	202.466168196534	135.979858898988	153.931434807278	156.564344514742
FBgn0262007	356.342024762085	-1.39474838698334	0.497378696447437	-2.80419808275953	0.00504419048985833	1	29.081706407693	15.9562429505086	58.2436922209207	13.1920758633346	12.1205854178959	13.5163462890425
FBgn0039462	29.3493024095797	0.883871521135843	0.315953729406064	2.79747139809795	0.00515043271294714	1	15.1224873320004	25.074096065085	24.9615823803946	46.6796530548764	38.7858733372668	33.7908657226061
FBgn0262945	113.709046416518	-1.25636545934128	0.452896392489831	-2.77406815372125	0.00553600791092355	1	47.6939985086165	64.9647034413565	183.051604122894	55.8126286525696	41.209990420846	25.9063303873314
FBgn0051296	32.3531018290882	-1.62454708550321	0.593754061173746	-2.73606058759711	0.00621795764290071	1	58.163412815386	42.1700706549156	141.448966822236	32.4728021251314	23.0291122940022	22.5272438150708
FBgn0037025	241.902669699635	-0.957710874383053	0.351225493540831	-2.72676924652599	0.00639577489326121	1	24.4286333824621	31.9124859010172	20.8013186503288	12.1773007969243	13.3326439596855	14.642708479796
FBgn0038301	96.8500516417025	0.595627038080775	0.218852376453556	2.72159273631271	0.00649681536873603	1	46.5307302523088	66.1044350806785	58.2436922209207	94.3740811761632	77.5717466745336	85.6035264972688
FBgn0264747	259.680703906127	-3.57279589605041	1.32421043681097	-2.69805749655213	0.00697453933808552	1	5.8163412815386	0	1.38675457668859	0	0	0
FBgn0031249	282.531809180465	-3.57121940241931	1.32587830289398	-2.69347450261795	0.00707115537401036	1	5.8163412815386	1.13973163932204	0	0	0	0
FBgn0043470	178.892571466629	-3.571323599703	1.32614288674671	-2.69301568887811	0.00708089369248424	1	6.97960953784632	0	0	0	0	0
FBgn0039777	375.660555948576	-3.57108681062992	1.32645377303986	-2.69220600311308	0.00709810864712793	1	5.8163412815386	1.13973163932204	0	0	0	0
FBgn0027584	765.457849105263	-1.54202106134924	0.572777223739006	-2.69218292459877	0.00709859987615995	1	3493.29457369208	888.990678671194	2053.7835280758	510.43185840441	1088.42857052705	611.614669579171
FBgn0034512	5376.32598697985	-0.602540574047844	0.224429052006769	-2.68477083808949	0.00725795515885413	1	12452.7866837741	7876.68535935465	10080.3190179494	6867.9976494653	6694.19932630389	6465.31897492531
FBgn0030805	213.02139565586	0.962700481138327	0.358742579001709	2.68354117266281	0.00728470048429541	1	9.30614605046176	12.5370480325425	12.4807911901973	24.3546015938486	20.604995210423	21.4008816243172
FBgn0039128	79.8020450543406	-1.98705749715406	0.740928434173972	-2.6818480780392	0.00732167013898888	1	4.65307302523088	5.69865819661022	12.4807911901973	3.04432519923107	1.21205854178959	1.12636219075354
FBgn0038466	303.5291973845	-0.558899726909571	0.209356701547267	-2.66960514174602	0.00759404930558548	1	147.73506855108	115.112895571526	187.211867852959	95.3888562425736	105.449093135694	103.625321549325
FBgn0259682	2223.32079685606	0.407539701863763	0.153720967413813	2.65116534666788	0.00802145613052856	1	467.633839035704	552.769845071191	459.015764883923	748.903999010844	629.058383188796	584.581977001086
FBgn0031670	502.862184574783	-0.29878113201058	0.112826128346267	-2.64815549722321	0.00809322896699394	1	395.511207144625	420.560974909834	449.308482847103	371.407674306191	316.347279407082	337.908657226061
FBgn0033395	408.900360075665	-0.478392391466993	0.180971940662931	-2.64346168646123	0.00820630525024567	1	513.001301031705	500.342189662377	822.345463976333	448.530579353378	452.097836087516	414.501286197302
FBgn0000500	127.729480709981	0.413958403488267	0.15824586626652	2.61591922275601	0.00889876068742081	1	157.041214601542	152.724039669154	170.570812932696	252.678991536179	198.777600853492	185.849761474334
FBgn0035496	20.247048982695	-1.4378483524507	0.550288061286811	-2.61290123047261	0.00897772433014164	1	13.9592190756926	10.2575847538984	15.2543003435745	4.05910026564143	4.84823416715835	5.63181095376769
FBgn0016684	147.364826175899	1.19315854822276	0.456663042664321	2.6127766794122	0.00898099652413031	1	9.30614605046176	5.69865819661022	4.16026373006577	12.1773007969243	18.1808781268438	14.642708479796
FBgn0032069	411.022213178442	-3.3409606259411	1.28664180749905	-2.59665169161197	0.00941373289795209	1	11.6326825630772	0	0	0	0	1.12636219075354
FBgn0015351	104.226344497531	-0.659217603439057	0.254661350120246	-2.58860483983057	0.00963656077757249	1	79.102241428925	86.6196045884753	109.553611558399	48.7092031876971	75.1476295909544	50.6862985839092
FBgn0036833	100.412792307975	2.12283989740832	0.820642699502322	2.58680166008388	0.00968713349630927	1	2.32653651261544	10.2575847538984	6.93377288344294	17.2511761289761	1.21205854178959	66.4553692544587
FBgn0034085	124.038735192745	-0.577461812899333	0.227543274746002	-2.53781094406737	0.0111548225525746	1	65.1430223532323	46.7289972122038	42.9893918773463	31.4580270587211	24.2411708357917	48.4335742024021
FBgn0030675	45.9344513536239	0.706649778243652	0.27858045863592	2.53660928589102	0.0111931800146188	1	31.4082429203084	23.9343644257629	19.4145640736402	47.6944281212868	41.209990420846	33.7908657226061
FBgn0030774	226.170475055618	-1.11464373180092	0.441354808224746	-2.52550490224482	0.0115532169588249	1	27.9184381513853	13.6767796718645	59.6304467976093	10.1477506641036	19.3929366686334	16.8954328613031
FBgn0034295	1305.20489126195	-2.82601234292768	1.12107716965894	-2.52080090417632	0.0117088080549818	1	15.1224873320004	0	0	1.01477506641036	1.21205854178959	0
FBgn0263748	97.2302059396684	1.03662251396375	0.414796087977271	2.49911352592253	0.0124504418768842	1	54.6736080464629	49.0084604908479	55.4701830675435	65.9603793166732	49.6944002133731	210.629729670912
FBgn0034225	292.742372645353	0.438184693179905	0.175419501862361	2.49792462370413	0.0124922753088355	1	87.245119223079	87.7593362277974	69.3377288344294	115.684357570781	99.3888004267462	117.141667838368
FBgn0038080	116.032362488034	-0.614368992101046	0.247120762614963	-2.48610835285537	0.0129148636916919	1	66.3062906095401	95.7374577030517	110.940366135087	63.9308291838525	59.3908685476898	54.0653851561698
FBgn0037012	263.930068854797	-0.301451849927095	0.121808918126314	-2.47479293440972	0.0133313443313753	1	355.960086430162	364.714124583054	359.169435362344	318.639370852852	264.22876211013	291.727807405166
FBgn0038609	237.774165020352	-0.552239797363563	0.223468474542455	-2.47122015082556	0.0134652895599942	1	70.9593636347709	70.6633616379667	52.6966739141664	42.620552789235	39.9979318790564	50.6862985839092
FBgn0027791	199.998378044578	-0.480687782308816	0.194636892737056	-2.46966428383235	0.0135239904570423	1	159.367751114158	164.121356062374	242.682050920503	135.979858898988	144.234966472961	123.899840982889
FBgn0011761	9359.91052444138	-2.18626951698066	0.886394811787972	-2.46647372920727	0.0136450737330957	1	41.8776572270779	9.11785311457635	4.16026373006577	5.07387533205179	4.84823416715835	2.25272438150707
FBgn0040364	144.221325557849	0.457039762458712	0.185405707966001	2.46507924417582	0.0136982952459104	1	84.9185827104636	83.2004096705092	84.5920291780039	131.920758633346	112.721444386432	101.372597167818
FBgn0052702	423.24787042526	-0.534792275186517	0.217098434807714	-2.46336310835307	0.0137640443927225	1	509.511496262781	443.355607696275	850.080555510105	419.102102427477	448.461660462147	375.078609520928
FBgn0015316	14.3078219755271	-1.07661579337123	0.438136692401996	-2.45726005614573	0.0140001299418486	1	13.9592190756926	14.8165113111866	23.574827803706	6.08865039846214	4.84823416715835	13.5163462890425
FBgn0029924	234.275788678914	-1.54075300365144	0.627792272371999	-2.45424015467725	0.0141182658531523	1	5.8163412815386	4.55892655728818	16.6410549202631	5.07387533205179	2.42411708357917	1.12636219075354
FBgn0010097	487.351047571058	-3.308962047718	1.3501817714143	-2.45075301546391	0.0142557733458125	1	5.8163412815386	0	0	0	0	0
FBgn0031653	972.931235566858	-3.30867556883146	1.35174678227485	-2.44770367661855	0.0143769841135736	1	5.8163412815386	0	0	0	0	0
FBgn0032066	192.378576143738	-3.30755849488857	1.35793999757856	-2.43571770533788	0.0148622781581999	1	5.8163412815386	0	0	0	0	0
FBgn0033381	148.559707790824	-0.530017910010252	0.21812101336556	-2.42992594721705	0.0151019080642691	1	74.4491684036941	87.7593362277974	76.2715017178724	61.9012790510318	58.1788100059002	45.0544876301415
FBgn0033292	15.1981804965861	-2.37880021446256	0.98292352523896	-2.42012745995091	0.0155150677671076	1	5.8163412815386	0	12.4807911901973	0	2.42411708357917	1.12636219075354
FBgn0266637	32.3782406383876	-1.11545204467525	0.461578596378552	-2.41660261855045	0.0156661096467944	1	103.530874811387	71.8030932772888	41.6026373006577	38.5614525235936	27.8773464611605	33.7908657226061
FBgn0039114	630.425312930993	0.411285145832054	0.170375838767714	2.41398750437137	0.0157790034911196	1	874.777728743406	1041.71471834035	895.843456540828	1276.58703354423	1119.94209261358	1343.75009356897
FBgn0267161	1199.07116315264	0.399629399841123	0.16577624498611	2.41065539803129	0.0159238860394213	1	1970.57642618528	2451.56275618172	2729.13300692314	3405.58512287316	3342.85745825568	2682.99473837493
FBgn0040759	14.4795433502465	-3.315106700455	1.38795171435163	-2.38848849435919	0.0169178380471523	1	3.48980476892316	0	2.77350915337718	0	0	0
FBgn0029672	329.851540958213	0.38419689314329	0.162412729796839	2.36555899050451	0.0180028749922932	1	116.326825630772	112.833432292882	97.0728203682012	145.112834496681	156.355551890857	126.152565364396
FBgn0037315	906.775775678804	-0.210914709741702	0.0891716200236089	-2.36526721938954	0.0180170657193503	1	1420.35054095173	1375.65608866171	1099.69637931405	1124.37077358268	1088.42857052705	1157.90033209464
FBgn0035996	71.9962726106496	-0.837035407536317	0.354611010755348	-2.3604326491537	0.01825363254351	1	63.9797540969246	52.427655408814	112.327120711776	43.6353278556454	55.754692922321	28.1590547688384
FBgn0034511	239.709677103883	-0.601924144867352	0.256073369857966	-2.35059250870645	0.0187435478372426	1	499.042081956012	281.513714912545	457.629010307234	293.269994192593	259.380527942972	262.442390445574
FBgn0011335	101.598111154994	0.47395516012677	0.201819185756734	2.34841478697699	0.0188535126439989	1	55.8368763027706	51.287923769492	48.5364101841006	77.1229050471871	78.7838052163232	60.823558300691
FBgn0035476	108.013102082784	-0.748330833982545	0.319201954898219	-2.34438048545523	0.0190587175928095	1	141.918727269542	99.1566526210178	245.45556007388	94.3740811761632	104.237034593905	90.108975260283
FBgn0015625	464.338905295449	-1.12875882009073	0.482027879410948	-2.34168783239282	0.0191967636978542	1	16.2857555883081	10.2575847538984	12.4807911901973	4.05910026564143	10.9085268761063	3.37908657226061
FBgn0035025	258.602260324248	-0.457189521705624	0.195401978346297	-2.33973844878571	0.0192972487373763	1	63.9797540969246	94.5977260637297	62.4039559509865	56.82740371898	47.2702831297939	57.4444717284304
FBgn0039003	255.562615030895	-0.320301486449374	0.137559357086473	-2.32846018790291	0.0198876808975185	1	218.694432185851	213.129816553222	293.991970257981	204.984563414892	189.081132519176	183.597037092827
FBgn0054008	26.3375237539112	-0.99142824398084	0.426042360062378	-2.32706495155947	0.0199618085630745	1	13.9592190756926	19.3754378684747	15.2543003435745	6.08865039846214	10.9085268761063	7.88453533527476
FBgn0259977	68.8799977625819	0.481875003566585	0.207110525828131	2.32665627031657	0.0199835670529759	1	117.49009388708	86.6196045884753	90.1390474847583	139.024184098219	121.205854178959	150.932533560974
FBgn0039809	99.4640611838947	-0.447885415965255	0.192743073385266	-2.32374325104797	0.0201392588843327	1	179.143311471389	159.562429505086	213.560204810043	149.171934762322	139.386732305803	114.888943456861
FBgn0050272	8.69888139196906	-3.29656944235662	1.42122281510921	-2.31953034197759	0.0203662978970814	1	4.65307302523088	1.13973163932204	0	0	0	0
FBgn0042627	545.854402239026	-0.770718094669661	0.333200801709598	-2.31307395034836	0.0207185736586576	1	91.8981922483099	113.973163932204	203.852922773223	89.3002058441114	79.9958637581128	69.8344558267193
FBgn0004378	293.009745986524	1.39018869998999	0.601496297312167	2.31121738604568	0.0208208505120765	1	2.32653651261544	2.27946327864409	5.54701830675435	6.08865039846214	14.544702501475	5.63181095376769
FBgn0030316	173.042596431648	-0.373092434293033	0.161495539851158	-2.31023367355465	0.0208752207145826	1	174.490238446158	191.474915406103	213.560204810043	135.979858898988	143.022907931171	167.827966422277
FBgn0037345	98.7983337044146	-0.942026609590483	0.407948975590056	-2.30917753434223	0.0209337316780208	1	65.1430223532323	71.8030932772888	187.211867852959	61.9012790510318	66.6632197984273	39.4226766763738
FBgn0034140	1181.82944305704	-0.383282014708193	0.16623251358873	-2.30569824418619	0.0211274992960561	1	2089.22978832867	2020.74419651798	1698.77435644352	1496.79322295528	1513.86111869519	1443.99632854604
FBgn0036911	192.207822315761	-0.302254635268196	0.131225507386847	-2.30332228304641	0.0212607168064395	1	177.980043215081	172.099477537629	185.825113276271	155.260585160785	134.538498138644	143.047998225699
FBgn0004650	736.85146982132	-2.21199218762107	0.962175996497699	-2.29894758928998	0.0215079156068852	1	13.9592190756926	3.41919491796613	2.77350915337718	2.02955013282071	0	2.25272438150707
FBgn0039135	557.918350355487	-0.318941313749124	0.138879720120566	-2.29652906466286	0.0216456492855422	1	476.939985086165	529.97521228475	589.37069509265	466.796530548764	386.646674830878	423.51218372333
FBgn0283467	189.574279641079	-0.545561281482316	0.237833317201424	-2.29388080653256	0.0217973461838435	1	72.1226318910787	69.5236299986447	48.5364101841006	57.8421787853904	30.3014635447397	41.6754010578809
FBgn0017456	11.5920261320693	-0.885545090787751	0.386135629804222	-2.29335244519326	0.0218277221129202	1	20.938828613539	23.9343644257629	40.2158827239691	15.2216259961554	12.1205854178959	18.0217950520566
FBgn0001218	4064.05129731886	0.280309581210849	0.122575420252726	2.28683353181989	0.0222055414720548	1	4359.92942464134	4090.49685352682	3568.11952581974	4930.79204768793	5009.43795321636	4658.63402095663
FBgn0026718	544.416411909611	-0.304075255986904	0.133011051636818	-2.28609015750939	0.0222489846817824	1	501.368618468627	631.411328184412	619.879295779799	476.944281212868	423.008431084566	518.126607746627
FBgn0065047	32.0592843250484	-0.945255210070158	0.414709068505355	-2.27932129257972	0.0226479732089004	1	40.7143889707702	23.9343644257629	42.9893918773463	17.2511761289761	18.1808781268438	20.2745194335637
FBgn0000147	275.603663254495	-0.720790349751293	0.316426292012745	-2.27790916224579	0.0227319902826107	1	23.2653651261544	23.9343644257629	26.3483369570832	16.2364010625657	15.7567610432646	12.3899840982889
FBgn0024250	61.4735698697159	0.437630190502035	0.19252272885946	2.27313519341138	0.0230180341846387	1	69.7960953784632	83.2004096705092	73.4979925644952	95.3888562425736	98.1767418849566	113.762581266107
FBgn0039251	212.453556795631	-1.72254678790352	0.758244363112901	-2.27175679992102	0.0231012034219592	1	5.8163412815386	3.41919491796613	9.70728203682012	2.02955013282071	2.42411708357917	1.12636219075354
FBgn0010038	197.308038881288	-0.744804218205011	0.32805968598332	-2.2703314367096	0.0231874810432139	1	137.265654244311	120.811553768137	214.946959386731	80.1672302464182	115.145561470011	86.7298886880224
FBgn0031321	180.36432359276	-0.436832399679925	0.192467364795021	-2.26964399988099	0.0232291916955626	1	77.9389731726173	75.2222881952549	97.0728203682012	57.8421787853904	67.8752783402169	58.5708339191839
FBgn0026085	35.4098442578461	2.93184298323816	1.29236335020102	2.26859031771686	0.0232932509580113	1	0	1.13973163932204	0	2.02955013282071	7.27235125073752	1.12636219075354
FBgn0005626	191.605866631749	0.392519271806023	0.173507692366689	2.26225861488882	0.0236814297477124	1	342.00086735447	349.897613271867	292.605215681292	426.20552789235	418.160196917408	449.418514110661
FBgn0039685	69.9447651817043	-1.11030521499145	0.490834949147452	-2.26207448536413	0.0236928016926452	1	67.4695588658478	107.134774096272	205.239677349911	43.6353278556454	69.0873368820065	63.0762826821981
FBgn0033205	508.039073800379	-0.608240522608893	0.269408898073696	-2.25768535099576	0.0239652831664514	1	446.695010422165	475.268093597292	805.70440905607	384.599750169525	376.950206496562	370.573160757914
FBgn0036734	220.780484884261	0.339467930395909	0.150858736377799	2.25023713274232	0.0244338963039157	1	298.959941871084	313.426200813562	228.814505153617	350.097397911573	370.889913787614	346.91955475209
FBgn0051373	105.497225960227	-2.1396392534539	0.950919883922478	-2.2500731025079	0.0244443051954104	1	4.65307302523088	3.41919491796613	6.93377288344294	2.02955013282071	0	1.12636219075354
FBgn0263241	413.20937379019	-0.267695902774485	0.118983550733986	-2.24985639715004	0.0244580625918255	1	546.736080464628	566.446624743056	643.454123583505	473.899956013637	523.609290053102	460.682136018197
FBgn0042083	464.250723372687	0.232786458475518	0.104208974808587	2.23384270791556	0.0254934243476666	1	425.756181808626	378.390904254919	406.319090969756	503.328432939537	473.914889839729	443.786703156894
FBgn0040609	47.692812396058	-0.610445973019291	0.27382028250437	-2.22936726029252	0.0257894787471993	1	38.3878524581548	34.1919491796613	30.5086006871489	24.3546015938486	27.8773464611605	15.7690706705495
FBgn0028978	541.182716941207	-0.362739136817218	0.163256905225944	-2.22189154152588	0.0262906361795069	1	645.613882250785	665.603277364074	868.108365007056	518.550058935693	540.578109638156	634.141913394242
FBgn0267408	3123.59294056886	-0.64889177889981	0.29221246582527	-2.22061634868041	0.0263769575387242	1	3715.47881064686	3563.94083616003	7767.21238403278	3240.17678704827	3439.82214159885	2915.02534967016
FBgn0265362	14.0116268717747	3.04481613262974	1.37387338350471	2.21622761543171	0.0266759175012408	1	0	0	0	1.01477506641036	3.63617562536876	1.12636219075354
FBgn0032646	477.391943520316	-0.230199345225752	0.103915504738407	-2.21525503634175	0.0267425641916046	1	387.368329350471	413.722585073902	348.075398748836	344.008747513111	335.740216075716	301.865067121948
FBgn0038893	177.683225363348	-0.465147061302358	0.210330823870302	-2.21150211244922	0.0270010857525917	1	150.061605063696	117.392358850171	194.145640736402	107.566157039498	115.145561470011	110.383494693847
FBgn0051272	254.094265469945	-0.687572257858757	0.311266084168789	-2.20895334515761	0.0271778861677869	1	94.2247287609253	87.7593362277974	198.305904466468	78.1376801135975	83.6320393834815	73.2135423989799
FBgn0029514	158.178930157888	-0.414475103509748	0.187774521185598	-2.20730214564136	0.0272929575096422	1	98.8778017861562	115.112895571526	138.675457668859	92.3445310433425	92.1164491760086	78.8453533527476
FBgn0031939	181.915671148962	-0.344102366706035	0.156008959274127	-2.2056577282937	0.0274079737836677	1	283.837454539084	249.601229011528	302.312497718112	225.280064743099	236.35141564897	195.987021191116
FBgn0033773	270.54872711977	1.52956678745626	0.693835482671034	2.20450931907942	0.0274885452973008	1	3.48980476892316	2.27946327864409	1.38675457668859	7.1034254648725	7.27235125073752	6.75817314452123
FBgn0004649	3470.26893341297	-3.37533137320681	1.53238563932873	-2.20266445115304	0.0276184075875643	1	50.020535021232	6.83838983593226	0	3.04432519923107	2.42411708357917	0
FBgn0266581	410.422871852986	0.343172279302963	0.155926607894771	2.20085772361929	0.0277460976222649	1	145.408532038465	151.584308029832	163.637040049253	191.792487551557	181.808781268438	209.503367480158
FBgn0027783	316.904041105804	0.459740161667696	0.209562535227836	2.19380893234502	0.0282491484057647	1	48.8572667649242	38.7508757369495	47.149655607412	54.7978535861593	60.6029270894794	69.8344558267193
FBgn0032228	39.5690037550002	-2.13772532719501	0.97495208222251	-2.19264655789219	0.0283328539341186	1	2.32653651261544	5.69865819661022	6.93377288344294	1.01477506641036	2.42411708357917	0
FBgn0261631	10.0566319105429	3.04306266237792	1.38993456924153	2.18935677241158	0.0285709189592016	1	0	0	0	0	0	5.63181095376769
FBgn0033816	314.400803863055	0.318330952093795	0.145630434832912	2.18588204079065	0.0288242364842113	1	198.91887182862	209.710621635256	163.637040049253	234.413040340792	233.92729856539	247.799681965778
FBgn0005683	157.992087187255	-0.893697052572281	0.409124248888067	-2.18441477131019	0.0289317837748704	1	24.4286333824621	10.2575847538984	12.4807911901973	9.13297559769321	10.9085268761063	5.63181095376769
FBgn0030411	178.980045695271	-0.387260582048401	0.177323138993397	-2.18392582178923	0.0289676992404128	1	103.530874811387	123.091017046781	134.515193938793	101.477506641036	93.3285077177982	79.9717155435012
FBgn0039505	125.549558641489	-0.383902646253538	0.175990493791458	-2.18138285757893	0.0291551104847458	1	105.857411324003	118.532090489493	105.393347828333	89.3002058441114	79.9958637581128	83.3508021157618
FBgn0051343	498.527120301576	-0.882734611916662	0.404998609210678	-2.17959911920949	0.029287190157021	1	22.1020968698467	9.11785311457635	13.8675457668859	6.08865039846214	10.9085268761063	7.88453533527476
FBgn0036024	1512.36763763081	-1.1986858007809	0.550539831019347	-2.17729169306693	0.0294588105882094	1	8.14287779415404	10.2575847538984	9.70728203682012	3.04432519923107	2.42411708357917	6.75817314452123
FBgn0042103	8.70716971519102	3.04196575631395	1.39924736166581	2.17400142365998	0.0297050282835429	1	0	0	0	1.01477506641036	1.21205854178959	3.37908657226061
FBgn0034493	95.8858195784013	-0.497496861488165	0.228847040434059	-2.17392744317144	0.0297105846776693	1	126.796239937542	99.1566526210178	178.891340392828	88.2854307777011	96.964683343167	100.246234977065
FBgn0032513	427.537179651792	0.225538282920961	0.103797022444042	2.17287815787347	0.0297894888016008	1	348.980476892316	314.565932452884	324.50057094513	387.644075368756	370.889913787614	396.479491145245
FBgn0034468	28.1621295031623	0.94555845564417	0.435639448277829	2.17050696254013	0.0299684617551589	1	4.65307302523088	10.2575847538984	15.2543003435745	17.2511761289761	20.604995210423	19.1481572428101
FBgn0263121	19.9813832962454	-1.33112516032823	0.61343712635326	-2.16994554640255	0.0300109713625672	1	5.8163412815386	14.8165113111866	6.93377288344294	4.05910026564143	2.42411708357917	4.50544876301415
FBgn0032346	169.464852557571	-0.456372328060558	0.210529078690108	-2.16774010934767	0.0301784659054715	1	60.4899493280015	56.9865819661022	52.6966739141664	40.5910026564143	31.5135220865293	51.8126607746627
FBgn0030506	205.287624447403	-0.32852049644922	0.151626119686543	-2.16664844505927	0.0302616704521722	1	151.224873320004	147.025381472544	228.814505153617	128.876433434115	134.538498138644	153.185257942481
FBgn0037718	858.568889202695	0.172197160696025	0.079514374947997	2.16561044224574	0.0303409677619961	1	935.267678071407	842.26168145899	848.693800933416	997.523890281381	1021.76535072862	941.638791469957
FBgn0032593	9.51224203291059	1.21856368068823	0.562774328550336	2.16527943594577	0.0303662922081515	1	9.30614605046176	4.55892655728818	4.16026373006577	10.1477506641036	12.1205854178959	20.2745194335637
FBgn0031970	68.4491272118473	0.497822252049623	0.229948927319186	2.16492530690787	0.0303934058201025	1	115.163557374464	137.907528357967	76.2715017178724	158.304910360016	151.507317723698	157.690706705495
FBgn0037167	808.778062939987	-0.397197240626609	0.183748170422868	-2.16163915924997	0.0306460005954326	1	1508.75892843111	1354.00118751459	1460.25256925308	1063.48426959805	1118.73003407179	1100.45586036621
FBgn0053281	14.9248474550256	-1.13492740350937	0.525700098384382	-2.15888756155326	0.0308588910878794	1	11.6326825630772	10.2575847538984	9.70728203682012	6.08865039846214	4.84823416715835	3.37908657226061
FBgn0011476	87.3116102278096	-0.596353606834878	0.276516074452818	-2.15666885917923	0.0310314750374796	1	76.7757049163095	86.6196045884753	80.4317654479381	57.8421787853904	63.0270441730585	40.5490388671274
FBgn0032297	742.181771550531	0.295889649998874	0.137617774011859	2.15008309881089	0.0315486422464854	1	1265.6358628628	1385.91367341561	1267.49368309337	1570.87180280323	1585.37257266078	1655.7524204077
FBgn0039085	95.7354528162074	-2.98690432063257	1.38968377480376	-2.14934100461406	0.0316073783132134	1	3.48980476892316	1.13973163932204	0	0	0	0
FBgn0024177	687.789017322531	-2.98681559451126	1.39024448028796	-2.14841032412703	0.0316811733511357	1	3.48980476892316	1.13973163932204	0	0	0	0
FBgn0037763	404.611853981907	-2.82833435596261	1.31708487810531	-2.1474199597761	0.0317598630277711	1	4.65307302523088	3.41919491796613	0	0	0	1.12636219075354
FBgn0028950	287.403437118418	-2.986737741385	1.39187843659174	-2.14583232476721	0.0318863586753468	1	4.65307302523088	0	0	0	0	0
FBgn0040734	527.046076709323	-0.66918228559892	0.312327591819515	-2.14256538047276	0.0321480135198645	1	928.288068533561	641.668912938311	1071.96128778028	642.352617037756	558.758987765	459.555773827443
FBgn0039873	217.98859937513	-2.98628788805242	1.39489230164306	-2.14087344559493	0.032284245082497	1	4.65307302523088	0	0	0	0	0
FBgn0026563	148.922358967881	-0.389967902658601	0.182498865829715	-2.13682370509891	0.0326123333101511	1	322.225306997239	320.264590649494	251.002578380635	242.531240872075	218.170537522126	221.893351578447
FBgn0036262	9546.20172459413	-0.362947023979646	0.169861982854596	-2.13671722112378	0.0326209984594114	1	18262.1483557749	20314.5767392761	14516.5469087761	13798.911353048	13781.1056201476	13705.575137089
FBgn0039580	592.938620164157	-0.207755854211087	0.0972694888476603	-2.13587895518261	0.0326892813610596	1	523.470715338474	531.114943924072	565.795867288944	464.766980415944	481.187241090466	456.176687255183
FBgn0030963	163.531038422071	0.516998590716057	0.243193080592016	2.12587705808695	0.033513497606665	1	25.5919016387698	31.9124859010172	48.5364101841006	44.6501029220557	54.5426343805314	50.6862985839092
FBgn0036240	270.284263290293	-0.323472313528078	0.152547391656454	-2.12047095670149	0.0339663482960343	1	187.286189265543	168.680282619663	212.173450233354	123.802558102064	166.052020225173	164.448879850016
FBgn0050373	171.153158396098	-0.429608319830555	0.203006421833539	-2.11623019582516	0.0343252342505965	1	180.306579727697	155.003502947798	227.427750576929	154.245810094374	133.326439596855	128.405289745903
FBgn0019940	1026.58593565586	-0.267352161709484	0.12640932876092	-2.11497176933144	0.0344323534816483	1	1905.43340383205	1829.26928111188	1714.0286567871	1593.19685426426	1445.98584035498	1487.92445398542
FBgn0265101	420.490640900985	-0.427134697136251	0.201964936493542	-2.1148953108002	0.0344388709448932	1	266.388430694468	258.719082126104	368.876717399165	238.472140606434	224.230830231074	200.49246995413
FBgn0053861	9.87435659378065	-2.99294998061383	1.41529485030813	-2.11471834293908	0.0344539600480019	1	1.16326825630772	1.13973163932204	2.77350915337718	0	0	0
FBgn0036382	23.3675756984961	-0.912252692121664	0.433142654910401	-2.10612527253953	0.0351934720859398	1	9.30614605046176	19.3754378684747	26.3483369570832	13.1920758633346	9.6964683343167	5.63181095376769
FBgn0031090	299.425183938585	0.352642852481768	0.167562222579755	2.10454866886191	0.0353306138772941	1	329.204916535085	327.102980485427	300.925743141424	415.043002161836	402.403435874143	405.490388671273
FBgn0038047	51.0720988978303	0.836484497717671	0.398197915989688	2.10067522738952	0.0356694853652662	1	11.6326825630772	6.83838983593226	8.32052746013153	13.1920758633346	25.4532293775813	10.1372597167818
FBgn0038467	1326.47105661079	-0.270660684936482	0.128959680514336	-2.09880083338445	0.0358344613534457	1	1885.65784347481	1635.51490242713	1729.28295713067	1280.64613380987	1519.92141140414	1553.25346104913
FBgn0034354	83.522848866929	-0.483319643755695	0.230530954372501	-2.09654987579121	0.0360334403790577	1	48.8572667649242	56.9865819661022	54.083428490855	38.5614525235936	31.5135220865293	43.928125439388
FBgn0053108	28.2186431637907	0.649882549187936	0.310430578712252	2.09348754199351	0.0363056550154678	1	29.081706407693	21.6549011471188	20.8013186503288	35.5171273243625	47.2702831297939	30.4117791503455
FBgn0040350	45.0555217509591	-2.01018431612993	0.96057882130757	-2.0926802377275	0.0363777085432956	1	6.97960953784632	2.27946327864409	4.16026373006577	2.02955013282071	1.21205854178959	0
FBgn0033926	26477.5333553086	-1.00427387805262	0.480589695974271	-2.08967001678369	0.0366474521688042	1	18383.1282544309	18097.7987007947	52932.4221922034	16570.2620594147	15690.0978234662	12313.3914693177
FBgn0032929	455.981042358973	1.45269596183686	0.695277287247013	2.08937640921493	0.0366738530953556	1	3.48980476892316	2.27946327864409	1.38675457668859	5.07387533205179	7.27235125073752	7.88453533527476
FBgn0267588	31.3293914085976	0.828746690625217	0.39677993534075	2.08868094580816	0.0367364531845616	1	10.4694143067695	6.83838983593226	12.4807911901973	22.3250514610279	18.1808781268438	11.2636219075354
FBgn0000451	12.223527353462	-1.42475799465813	0.682581212006056	-2.0873091283466	0.0368602001682959	1	8.14287779415404	9.11785311457635	9.70728203682012	3.04432519923107	3.63617562536876	3.37908657226061
FBgn0010750	483.921314441011	0.264017773733022	0.126545050471404	2.08635401186776	0.0369465674633164	1	535.103397901551	429.678828024411	356.395926208967	493.180682275434	544.214285263525	554.17019785074
FBgn0000359	7543.06246199367	-2.00210657718054	0.960279483934225	-2.08492070347894	0.0370764990362665	1	10.4694143067695	2.27946327864409	0	0	0	3.37908657226061
FBgn0015663	89.8361027683028	0.354724367379736	0.17043517554879	2.08128613261638	0.0374077236995497	1	94.2247287609253	94.5977260637297	105.393347828333	118.728682770012	130.902322513275	126.152565364396
FBgn0030748	52.4254140012486	1.18889644635274	0.572168750078825	2.07787728041588	0.0377206635921149	1	3.48980476892316	5.69865819661022	2.77350915337718	12.1773007969243	13.3326439596855	2.25272438150707
FBgn0031782	127.164585818002	-0.471314232082253	0.227209118664171	-2.07436318952887	0.0380455932976409	1	46.5307302523088	67.2441667200006	83.2052746013153	34.5023522579521	55.754692922321	51.8126607746627
FBgn0010173	1244.81189986518	-0.339453781294648	0.163729721843907	-2.07325693509862	0.038148374237865	1	568.838177334475	524.27655408814	865.334855853679	544.934210662362	550.274577972473	449.418514110661
FBgn0053774	115.330879007614	-0.514730361328019	0.248326360249214	-2.07279791324388	0.0381910907329908	1	79.102241428925	79.7812147525431	130.354930208727	67.9899294494939	65.4511612566377	67.5817314452123
FBgn0032486	89.0922510044749	-0.416044154493356	0.20093029821993	-2.07058944409654	0.038397179467936	1	63.9797540969246	60.4057768840683	72.1112379878066	51.7535283869282	46.0582245880043	48.4335742024021
FBgn0037906	278.569448432356	0.744263702549433	0.359605095632016	2.06966951133261	0.0384833037437399	1	150.061605063696	139.047259997289	187.211867852959	143.08328436386	391.494908998037	263.568752636328
FBgn0031413	133.656780713723	0.30832871143606	0.149036675791091	2.06881098091757	0.0385638275811819	1	147.73506855108	124.230748686103	141.448966822236	164.393560758478	157.567610432646	189.228848046594
FBgn0028707	22.2685573033497	0.788553352665534	0.381507164805691	2.06694244672223	0.0387395774214601	1	13.9592190756926	10.2575847538984	9.70728203682012	21.3102763946175	24.2411708357917	13.5163462890425
FBgn0050083	104.718021736489	0.319561779043294	0.154628781172006	2.06663841376218	0.0387682383103075	1	152.388141576311	172.099477537629	155.316512589122	217.161864211816	204.83789356244	176.838863948305
FBgn0031322	114.430129723123	0.380443292333039	0.18424561776469	2.06487023652809	0.0389352799449796	1	141.918727269542	143.606186554578	156.703267165811	210.058438746944	202.413776478861	162.196155468509
FBgn0050001	41.2682447571235	-0.94042894487211	0.456449507555116	-2.06031319851639	0.0393686089642585	1	6.97960953784632	14.8165113111866	19.4145640736402	8.11820053128286	4.84823416715835	7.88453533527476
FBgn0011297	228.266109159798	-0.271566829107718	0.132071857583457	-2.05620511497776	0.0397627494669004	1	200.082140084928	199.453036881358	208.013186503288	173.526536356171	153.931434807278	174.586139566798
FBgn0038590	60.4793421408494	0.483370145022654	0.235135067291864	2.05571270414832	0.0398102166480134	1	33.7347794329239	47.8687288515258	54.083428490855	66.9751543830836	52.1185172969523	68.7080936359658
FBgn0034479	223.372386027526	0.631614867872231	0.307505837640261	2.05399309723392	0.0399763598083233	1	347.817208636008	379.530635894241	224.654241423551	534.786459998258	476.339006923308	465.187584781211
FBgn0036290	600.923490867452	-0.413036997983184	0.201236445538473	-2.05249599235352	0.040121484136345	1	595.593347229553	548.210918513903	852.854064663482	539.86033533031	532.093699845629	425.764908104837
FBgn0038919	25.5396179698397	-0.561290458125341	0.273826382152536	-2.04980416318203	0.0403835451952343	1	51.1838032775397	39.8906073762715	56.8569376442321	37.5466774571832	29.0894050029501	32.6645035318526
FBgn0259231	32.7256484710744	0.420489460879194	0.205823094210258	2.04296540430806	0.0410558629381999	1	69.7960953784632	70.6633616379667	61.0172013742979	86.2558806448803	92.1164491760086	92.3616996417901
FBgn0038959	30.3528270739521	0.469483924720174	0.22981368033958	2.04288937032142	0.0410633908141679	1	61.6532175843092	51.287923769492	47.149655607412	69.0047045159043	67.8752783402169	85.6035264972688
FBgn0035825	222.999074006193	-0.411913063433196	0.201923791886246	-2.03994318641385	0.0413559847032166	1	166.347360652004	159.562429505086	202.466168196534	119.743457836422	143.022907931171	134.037100699671
FBgn0038470	310.505989062204	-0.549628765142379	0.269914436874335	-2.03630739988269	0.0417194972354699	1	52.3470715338474	38.7508757369495	113.713875288464	45.6648779884661	42.4220489626356	49.5599363931557
FBgn0028426	289.113133790002	-0.271931564269711	0.133859999194751	-2.03146246754478	0.042208103173694	1	177.980043215081	184.636525570171	244.068805497192	176.570861555402	155.143493349067	166.701604231524
FBgn0003295	16.2926288621742	0.862094245018985	0.424894676937974	2.02895986184556	0.042462378724103	1	30.2449746640007	35.3316808189834	11.0940366135087	49.7239782541075	48.4823416715835	42.8017632486344
FBgn0036486	756.205521998231	0.362526372123776	0.178979191719956	2.02552245677258	0.0428137449105228	1	74.4491684036941	85.4798729491533	63.7907105276751	90.3149809105218	95.7526248013774	103.625321549325
FBgn0036690	402.631500075705	-0.989405445761766	0.489999055819236	-2.01919867806187	0.0434665736772724	1	12.7959508193849	5.69865819661022	15.2543003435745	8.11820053128286	4.84823416715835	3.37908657226061
FBgn0031607	182.817637740158	-0.283064880748741	0.140357095024674	-2.01674792926557	0.0437218253925564	1	145.408532038465	162.981624423052	171.957567509385	126.846883301295	133.326439596855	134.037100699671
FBgn0262647	299.438608098133	0.4445779684252	0.22057840543269	2.015509938759	0.0438512457496278	1	131.449312962772	99.1566526210178	94.299311214824	150.186709828733	163.627903141594	129.531651936657
FBgn0010385	393.94258116017	1.91520116825736	0.950753747893679	2.01440296449038	0.043967243377419	1	10.4694143067695	60.4057768840683	81.8185200246267	59.8717289182111	345.436684410032	170.080690803784
FBgn0030189	216.91425958407	-0.544116588376606	0.270374176055929	-2.01245768480512	0.0441717129828063	1	236.143456030467	202.872231799324	440.987955386971	169.46743609053	230.291122940022	202.745194335637
FBgn0000566	780.927014367756	-0.302703074175804	0.150536829692059	-2.01082402754873	0.044344047251774	1	599.083151998476	508.320311137632	744.687207681772	490.136357076202	527.245465678471	482.083017642514
FBgn0032699	776.340512927795	-0.444370560599157	0.221196680493604	-2.00893864956534	0.0445436404330779	1	815.451047671712	738.546102280685	1059.48049659008	570.303587322621	707.842188405119	642.026448729516
FBgn0043806	412.783945166733	-0.389036932137973	0.193818252054397	-2.00722547032766	0.0447256607596108	1	657.246564813862	792.11348932882	786.28984498243	608.865039846214	567.243397557527	530.516591844916
FBgn0036397	322.78344200185	-0.302937569667877	0.151995961999676	-1.99306327406594	0.0462545189062488	1	193.102530547082	201.732500160002	213.560204810043	157.290135293605	153.931434807278	181.34431271132
FBgn0030610	145.674334804615	-0.366608911138688	0.184024060675941	-1.99217922804275	0.0463513964884906	1	137.265654244311	170.959745898307	184.438358699582	145.112834496681	129.690263971486	105.878045930833
FBgn0036948	284.11229644906	-1.30866866940726	0.657296502645932	-1.99098681362102	0.0464823369614592	1	8.14287779415404	4.55892655728818	9.70728203682012	2.02955013282071	2.42411708357917	4.50544876301415
FBgn0000594	14.9976007508352	-0.664482828798887	0.333937323920691	-1.98984294716544	0.0466082387996404	1	39.5511207144625	38.7508757369495	31.8953552638375	25.3693766602589	18.1808781268438	25.9063303873314
FBgn0032168	120.460482545743	0.403537987317112	0.203544329781576	1.98255577912757	0.0474170710051007	1	60.4899493280015	61.5455085233904	38.8291281472805	64.9456042502628	83.6320393834815	67.5817314452123
FBgn0051523	1397.79821062708	0.231413314145479	0.116801293852513	1.98125642715644	0.0475625241327413	1	1470.37107597296	1461.13596161086	1256.39964647986	1657.12768344811	1556.28316765783	1705.31235680086
FBgn0004192	241.204009618708	-0.756209388672477	0.381872786561123	-1.98026519638219	0.0476737373736465	1	240.796529055698	227.946327864409	246.842314650569	149.171934762322	153.931434807278	120.520754410629
FBgn0001120	483.622817660626	-2.61196850581875	1.31902423016199	-1.98022784274249	0.0476779326149663	1	2.32653651261544	1.13973163932204	4.16026373006577	0	1.21205854178959	0
FBgn0030720	331.021578816249	0.318840636841839	0.161191075233721	1.97802909608694	0.0479254243680778	1	150.061605063696	156.14323458712	126.194666478662	181.644736887454	175.74848855949	183.597037092827
FBgn0031381	1128.00216264756	-0.357754204632832	0.180887406634045	-1.97777286594974	0.0479543358416012	1	1013.20665124402	1051.97230309425	1346.53869396462	962.006762957019	859.349506128817	839.139832111385
FBgn0032235	497.982404081153	-0.771635713778395	0.391769625730316	-1.96961597607255	0.0488823992638742	1	15.1224873320004	20.5151695077968	19.4145640736402	13.1920758633346	10.9085268761063	7.88453533527476
FBgn0035620	232.002432412297	-2.61228763533227	1.32684848435846	-1.96879121175265	0.0489770718999322	1	4.65307302523088	0	2.77350915337718	0	0	1.12636219075354
FBgn0015331	95.699630418354	0.381666083649892	0.194033376052671	1.96701253884429	0.0491817652362532	1	80.2655096852327	98.0169209816958	90.1390474847583	106.551381973087	115.145561470011	128.405289745903
FBgn0051148	391.115085007776	-2.61054950111041	1.32776450262867	-1.96612388412412	0.0492843020861649	1	4.65307302523088	1.13973163932204	1.38675457668859	1.01477506641036	0	0
FBgn0036194	532.278010743518	-0.195994351082928	0.0996980091946039	-1.96588028854578	0.0493124405071431	1	411.796962732933	413.722585073902	404.932336393068	379.525874837474	349.072860035401	344.666830370582
FBgn0031048	604.073572804625	-0.280908864275347	0.143078570331778	-1.96331892067387	0.0496091282887813	1	507.184959750166	453.613192450173	590.757449669339	425.19075282594	442.401367753199	407.743113052781
FBgn0038769	76.5806863316757	0.493988007110959	0.25162984780732	1.96315346297558	0.049628344918606	1	36.0613159455393	33.0522175403393	44.3761464540348	53.7830785197489	46.0582245880043	58.5708339191839
FBgn0265186	88.1129218139664	-2.61793502707849	1.33387785706915	-1.96264973828318	0.0496868870801164	1	2.32653651261544	0	5.54701830675435	1.01477506641036	0	0
FBgn0260991	300.088371354378	1.37976098548108	0.703525532722334	1.96120953868158	0.0498545846093724	1	2.32653651261544	2.27946327864409	4.16026373006577	6.08865039846214	8.48440979252711	7.88453533527476
FBgn0030739	143.102828251356	0.311716532049558	0.15911008621712	1.95912490188832	0.0500981611712139	1	119.816630399695	90.0387995064415	126.194666478662	138.009409031809	116.3576200118	159.943431087002
FBgn0037606	269.35836092418	0.246343664295577	0.12588121058849	1.95695340983717	0.0503529462413736	1	225.674041723698	266.697203601358	220.493977693486	282.107468462079	287.257874404132	278.211461116124
FBgn0036767	103.069105961426	2.71712547931708	1.38985115141862	1.95497588108173	0.0505859171293616	1	0	0	0	2.02955013282071	1.21205854178959	1.12636219075354
FBgn0030460	170.325081302132	-0.342096336261597	0.175260306989275	-1.9519327686818	0.0509461871907168	1	110.510484349233	128.789675243391	120.647648171907	100.462731574625	84.8440979252711	97.9935105955578
FBgn0003023	785.289945971682	-2.1170025647948	1.08598903512392	-1.94937747649841	0.0512503623022822	1	10.4694143067695	2.27946327864409	1.38675457668859	1.01477506641036	0	2.25272438150707
FBgn0000618	95.0551571839034	-0.477311559389855	0.245704846325574	-1.94262167200963	0.0520618864264059	1	66.3062906095401	53.5673870481361	77.658256294561	45.6648779884661	42.4220489626356	52.9390229654163
FBgn0029714	193.877313135142	-0.391492206027961	0.201584135612568	-1.94207845194913	0.0521276036670403	1	107.02067958031	79.7812147525431	76.2715017178724	67.9899294494939	69.0873368820065	64.2026448729516
FBgn0030894	192.587291858559	0.283995717759939	0.146356904067946	1.94043266744762	0.0523271297233577	1	94.2247287609253	125.370480325425	95.6860657915126	131.920758633346	126.054088346117	127.27892755515
FBgn0038865	349.94036980024	-0.258619133603809	0.13342786249574	-1.93826932970665	0.0525903722064589	1	728.205928448633	749.943418673905	568.569376442321	554.067186260055	545.426343805314	613.867393960678
FBgn0264744	57.0329579749792	0.688972113779646	0.355737181125003	1.93674473835094	0.0527765540501314	1	15.1224873320004	14.8165113111866	12.4807911901973	27.3989267930796	23.0291122940022	18.0217950520566
FBgn0051793	723.14023939614	-0.252669207007126	0.130520967241538	-1.93585147541501	0.0528858942955565	1	1201.65610876587	1108.95888506035	1279.97447428357	980.272714152405	1012.06888239431	1020.4841448227
FBgn0036449	2207.95974273851	-0.256220884193121	0.132469696732596	-1.93418487784666	0.0530904009951731	1	3892.29558560563	3320.03826534511	2745.77406184341	2796.72008302694	2599.86557213866	2943.18440443899
FBgn0033927	218.808728802745	-0.893018417090742	0.461807872381856	-1.93374446495431	0.0531445539030817	1	147.73506855108	132.208870161357	424.346900466708	126.846883301295	152.719376265488	99.1198727863113
FBgn0026316	452.333045039455	-0.25273758504219	0.130819317669358	-1.93195920560431	0.0533645412168246	1	390.858134119394	400.045805402037	409.092600123134	337.920097114649	329.679923366768	339.035019416815
FBgn0035755	176.901898384596	0.254450511903456	0.131746063723809	1.93137088662386	0.0534372028167677	1	330.368184791393	297.469957863053	246.842314650569	347.053072712342	351.49697711898	348.045916942843
FBgn0032116	120.661890658043	0.465011101397672	0.240865184651547	1.93058661454286	0.0535341945016446	1	84.9185827104636	74.0825565559329	108.16685698171	115.684357570781	95.7526248013774	155.437982323988
FBgn0260487	11.7891081265109	0.698979971026545	0.362144324310292	1.93011438839408	0.0535926660418155	1	31.4082429203084	22.7946327864409	13.8675457668859	31.4580270587211	41.209990420846	39.4226766763738
FBgn0263606	64.9098528267532	0.455209304472941	0.236221691007715	1.92704278142719	0.0539742985720651	1	40.7143889707702	43.3098022942377	41.6026373006577	59.8717289182111	60.6029270894794	51.8126607746627
FBgn0030878	396.157458471005	-0.268167227252217	0.13918155871652	-1.92674395749806	0.0540115467922327	1	316.4089657157	329.382443764071	391.064790626182	280.077918329259	293.31816711308	286.095996451399
FBgn0031002	270.847883431219	-0.341952682867974	0.177735558254681	-1.92394074784958	0.0543620108966899	1	386.205061094163	421.700706549156	507.552175068023	394.747500833629	299.378459822028	341.287743798322
FBgn0087007	531.799984915439	0.311145608808748	0.161790093611233	1.92314375907589	0.0544619980700505	1	682.838466452632	642.808644577633	524.193229988286	728.608497682636	746.628061742386	822.244399250082
FBgn0250785	539.803898263346	-0.194564449276777	0.101310698640903	-1.92047288081995	0.0547981954644233	1	798.002023827096	708.913079658311	734.979925644952	648.441267436218	672.692490693221	638.647362157256
FBgn0029819	473.297405376056	-0.192826953728031	0.100439209553441	-1.9198374278865	0.0548784376041446	1	414.123499245548	467.289972122038	474.270065227497	373.437224439011	378.162265038351	433.649443440112
FBgn0011232	327.656374420878	0.266303135112158	0.138964214430888	1.9163432557279	0.0553214184326953	1	208.225017879082	233.644986061019	255.1628421107	270.944942731565	276.349347528026	289.475083023659
FBgn0083945	12.5361055364801	2.18690024278774	1.1412821769688	1.91617838858753	0.0553423932138935	1	1.16326825630772	1.13973163932204	0	5.07387533205179	3.63617562536876	2.25272438150707
FBgn0040503	52.0678246577364	-0.419247704926696	0.218808919989452	-1.91604485295621	0.0553593867853213	1	89.5716557356945	79.7812147525431	94.299311214824	49.7239782541075	69.0873368820065	78.8453533527476
FBgn0037819	650.947060279316	0.303081865720641	0.158264861898821	1.91502941388469	0.0554887525643141	1	804.981633364942	826.305438508482	718.338870724689	969.110188421891	877.530384255661	1053.14864835456
FBgn0027790	156.592000368402	0.25751211282625	0.134718457387665	1.91148353254398	0.0559424710355345	1	355.960086430162	281.513714912545	305.086006871489	368.36334910696	336.952274617505	421.259459341823
FBgn0004396	204.761036192774	0.40055005702724	0.209979279329523	1.90756944354806	0.0564468876375058	1	332.694721304008	339.640028517969	249.615823803946	342.993972446701	486.035475257625	390.847680191478
FBgn0011278	31.705476300529	0.441451444557398	0.232131710548687	1.90172830551218	0.0572066833830454	1	65.1430223532323	64.9647034413565	47.149655607412	77.1229050471871	96.964683343167	68.7080936359658
FBgn0027583	176.082553973501	0.312216698470524	0.164384609140762	1.89930614613181	0.0575242352451654	1	133.775849475388	149.304844751188	113.713875288464	165.408335824888	163.627903141594	165.57524204077
FBgn0037340	134.888776287259	-0.409725986910459	0.216128480110302	-1.8957519467187	0.057992852755068	1	88.4083874793867	117.392358850171	131.741684785416	70.0194795823146	81.2079222999024	102.498959358572
FBgn0000279	144.768782373736	1.4213711747794	0.75003115999788	1.89508283200317	0.0580814287314881	1	25.5919016387698	51.287923769492	88.7522929080697	72.0490297151353	212.110244813178	158.817068896249
FBgn0039464	860.813886726998	-0.315075495246597	0.166279780618377	-1.89485152118233	0.058112075300149	1	1295.8808375268	1275.35970440137	1722.34918424723	1110.16392265293	1212.05854178959	1127.48855294429
FBgn0031097	13.071655096871	-0.678821326445779	0.358740132945417	-1.89223692613467	0.0584594204755635	1	37.2245842018471	34.1919491796613	20.8013186503288	14.206850929745	21.8170537522126	22.5272438150708
FBgn0031494	37.1450756915758	0.657297391369083	0.347901267274429	1.88932163575765	0.0588487441724196	1	22.1020968698467	10.2575847538984	12.4807911901973	26.3841517266693	26.6652879193709	18.0217950520566
FBgn0042179	45.2809627164755	-1.22601037905556	0.649024143341168	-1.88900581224001	0.0588910498982404	1	6.97960953784632	5.69865819661022	8.32052746013153	4.05910026564143	2.42411708357917	2.25272438150707
FBgn0031834	108.038322401587	0.330530621857666	0.174989551699365	1.88885918415017	0.058910699853042	1	79.102241428925	85.4798729491533	70.724483411118	92.3445310433425	95.7526248013774	109.257132503093
FBgn0038535	1475.78145202262	0.275258748835216	0.145925296990914	1.88629904828876	0.059254667462442	1	1623.92248580558	1513.56361701967	1352.08571227137	1751.50176462428	1858.08574456344	1825.83311121148
FBgn0028932	96.1251209825185	-0.377049097367249	0.200180551671707	-1.88354510075287	0.0596265337953483	1	88.4083874793867	84.3401413098313	108.16685698171	59.8717289182111	73.9355710491648	82.2244399250082
FBgn0040736	1440.18628532499	-0.38053796506705	0.20205630012666	-1.88332640372267	0.059656147311513	1	2662.72103868837	2209.93964864544	2045.46300061567	1998.09210576199	1542.95052369814	1772.89408824607
FBgn0052202	76.6476841550666	-0.480311258170509	0.255252129511103	-1.88171303052583	0.0598749895504549	1	50.020535021232	47.8687288515258	54.083428490855	42.620552789235	36.3617562536876	29.285416959592
FBgn0034688	386.691184104832	0.206494608797294	0.109748864203619	1.88151932410145	0.059901309117811	1	417.613304014472	381.810099172885	310.633025178244	397.79182603286	429.068723793514	459.555773827443
FBgn0051871	11.7998883284384	0.68476734253163	0.36433382438708	1.8795052687837	0.0601755347841008	1	25.5919016387698	18.2357062291527	20.8013186503288	39.5762275900039	29.0894050029501	34.9172279133597
FBgn0043578	1492.10579704014	0.727185112259264	0.38706173072484	1.8787316196243	0.0602811480656059	1	1415.6974679265	1282.1980942373	1999.70009958494	1916.91010044916	3164.68485261261	2694.25836028246
FBgn0005585	3248.39332148596	0.135973807991479	0.0724735091547636	1.87618634142737	0.0606296969360864	1	2712.7415737096	2638.47874503053	2601.55158586779	2999.67509630902	2978.02783717702	2761.84009172767
FBgn0039126	204.101341824756	0.276683746520653	0.147538130299934	1.8753372159331	0.0607463465381912	1	101.204338298772	95.7374577030517	98.4595749448898	124.817333168474	119.993795637169	112.636219075354
FBgn0015781	254.481105865308	-0.251499886058959	0.134159381699177	-1.87463510097931	0.060842940795788	1	301.2864783837	305.448079338308	339.754871288704	271.959717797976	230.291122940022	290.601445214413
FBgn0038344	523.331191780445	-0.442906556539682	0.236323834807094	-1.87415102205504	0.0609096125879569	1	536.266666157859	499.202458023055	1038.67917793975	515.505733736461	527.245465678471	480.956655451761
FBgn0039500	17.4434590524792	-0.582051170783236	0.311218214985863	-1.87023491157057	0.0614512036466887	1	36.0613159455393	39.8906073762715	38.8291281472805	25.3693766602589	23.0291122940022	28.1590547688384
FBgn0037135	3171.55459530746	-0.22569021312254	0.120752974965253	-1.8690240400908	0.0616194698421029	1	3250.17150812377	3328.01638682037	3781.67973062978	2921.53741619542	3003.4810665546	2933.04714472221
FBgn0035243	55.8322046013638	0.480392947265443	0.257045795891279	1.86890023079246	0.0616366962126713	1	31.4082429203084	30.7727542616952	29.1218461104604	49.7239782541075	44.8461660462147	32.6645035318526
FBgn0031894	31.4387165792502	-0.673238417241612	0.360374477716623	-1.86816342130367	0.061739295652654	1	23.2653651261544	38.7508757369495	16.6410549202631	14.206850929745	10.9085268761063	24.7799681965778
FBgn0050488	17.4652739843485	-0.80050252029111	0.428863556220953	-1.86656690380725	0.061962092990122	1	30.2449746640007	44.4495339335597	22.1880732270174	15.2216259961554	23.0291122940022	18.0217950520566
FBgn0042127	13.0407027088849	1.01879001106652	0.546326653430248	1.86480012400968	0.0622094259212074	1	6.97960953784632	7.97812147525431	1.38675457668859	13.1920758633346	8.48440979252711	12.3899840982889
FBgn0024196	346.242810605806	-0.403371858090818	0.216509785734377	-1.86306525001919	0.0624530865736424	1	212.878090904313	221.107938028477	298.152233988047	196.866362883609	181.808781268438	173.459777376045
FBgn0028411	244.067901926562	-0.432321833681892	0.232187514227139	-1.86195125573794	0.0626099613000619	1	98.8778017861562	79.7812147525431	113.713875288464	70.0194795823146	72.7235125073752	73.2135423989799
FBgn0027296	240.050132480212	-0.296451790401862	0.159317706133499	-1.86075859109754	0.0627782755881988	1	278.021113257545	289.491836387799	338.368116712016	228.32438994233	246.047883983286	262.442390445574
FBgn0024912	126.403421323621	-0.359027500431663	0.193246218429925	-1.8578759436985	0.0631866332997658	1	87.245119223079	96.8771893423737	144.222475975613	95.3888562425736	81.2079222999024	76.5926289712405
FBgn0035781	239.419075076992	0.964316693923035	0.520039245042766	1.85431523315848	0.0636940740298945	1	1.16326825630772	4.55892655728818	11.0940366135087	7.1034254648725	4.84823416715835	19.1481572428101
FBgn0010039	220.187341085306	-0.583463422067313	0.314980614224126	-1.85237883132753	0.0639714428831015	1	241.959797312006	256.43961884746	475.656819804186	198.89591301643	236.35141564897	214.008816243172
FBgn0003356	831.593399283302	-1.58776024924473	0.857962949763499	-1.85061633451934	0.0642247680822731	1	2.32653651261544	10.2575847538984	0	0	0	4.50544876301415
FBgn0034000	54.00463933055	-0.51897310352765	0.280525281116513	-1.85000475344716	0.0643128644810953	1	30.2449746640007	30.7727542616952	33.2821098405261	22.3250514610279	25.4532293775813	18.0217950520566
FBgn0037552	145.737731981974	0.256796688800752	0.138818049322253	1.84987968102493	0.0643308930649941	1	198.91887182862	170.959745898307	198.305904466468	219.191414344637	232.715240023601	226.398800341461
FBgn0053294	25.9439402567711	0.454568619853496	0.245744916423916	1.84975797859173	0.0643484398859349	1	36.0613159455393	41.0303390155936	38.8291281472805	54.7978535861593	52.1185172969523	51.8126607746627
FBgn0033264	519.998038709644	0.236462582579156	0.128194163690108	1.84456589732722	0.0651007116553914	1	182.633116240312	160.702161144408	153.929758012433	211.073213813354	191.505249602755	183.597037092827
FBgn0028988	472.141746412659	-0.272066849681062	0.147507565400733	-1.84442641258392	0.0651210209946999	1	892.226752588021	922.042896211534	832.052746013153	758.036974608537	716.326598197646	717.492715510003
FBgn0263979	917.195009246343	0.228835433700703	0.124251935794952	1.84170517937315	0.0655182861938522	1	240.796529055698	232.505254421697	210.786695656665	269.930167665155	259.380527942972	273.70601235311
FBgn0033649	122.131404117615	0.271116710583622	0.147418284901338	1.83909825545096	0.0659007355774142	1	188.449457521851	184.636525570171	145.609230552302	200.925463149251	203.625835020651	224.146075959954
FBgn0038871	122.553812747806	-0.335980676777613	0.182784980615341	-1.83811971665583	0.0660447664506588	1	115.163557374464	98.0169209816958	126.194666478662	103.507056773856	78.7838052163232	84.4771643065153
FBgn0026737	229.288297639015	-0.36062960769388	0.196354507112931	-1.83662505636536	0.066265265736201	1	111.673752605541	119.671822128815	173.344322086074	119.743457836422	98.1767418849566	94.6144240232971
FBgn0037517	77.6000088198454	-1.58964984157661	0.868317108826019	-1.83072500290343	0.0671415992200907	1	6.97960953784632	2.27946327864409	4.16026373006577	0	3.63617562536876	1.12636219075354
FBgn0027556	566.257598656195	0.370341638543453	0.202329220672394	1.8303912668309	0.0671914526647394	1	925.961532020945	870.754972442042	540.83428490855	897.061158706756	992.675945725672	1135.37308827957
FBgn0264848	330.783619059173	0.346718728229144	0.189491811874451	1.8297293418613	0.0672904210582819	1	105.857411324003	107.134774096272	76.2715017178724	132.935533699757	134.538498138644	102.498959358572
FBgn0030048	161.38993104874	0.447431201609627	0.24473360468369	1.82823769619998	0.0675138858272718	1	32.5715111766162	30.7727542616952	34.6688644172147	47.6944281212868	42.4220489626356	42.8017632486344
FBgn0029999	332.731837002676	-0.28129962769568	0.153904290443398	-1.82775689284072	0.0675860454022358	1	129.122776450157	150.44457639051	160.863530895876	118.728682770012	119.993795637169	122.773478792136
FBgn0023511	514.190668727452	-0.200416057044361	0.109660032527255	-1.82761259891611	0.0676077135913731	1	694.471149015709	678.140325396616	722.499134454755	568.2740371898	631.482500272375	624.00465367746
FBgn0036754	130.200403884322	-0.442667794115935	0.242410783417406	-1.82610603321927	0.0678342916135988	1	54.6736080464629	41.0303390155936	42.9893918773463	36.5319023907729	37.5738147954772	28.1590547688384
FBgn0029913	130.400957387921	-0.311055942816227	0.170403929423007	-1.82540358000823	0.0679401494665105	1	94.2247287609253	83.2004096705092	106.780102405021	72.0490297151353	66.6632197984273	88.9826130695295
FBgn0052452	81.2612676337408	0.610788897197619	0.335009666559782	1.82319783028895	0.0682734335822855	1	27.9184381513853	23.9343644257629	27.7350915337718	44.6501029220557	50.9064587551627	25.9063303873314
FBgn0037850	36.6374308307956	-0.787061276186963	0.431740891136263	-1.82299451440785	0.068304221725606	1	32.5715111766162	37.6111440976275	69.3377288344294	33.4875771915418	20.604995210423	25.9063303873314
FBgn0037670	138.69579348231	0.337994904084754	0.18575838202785	1.8195405256818	0.0688290059117125	1	77.9389731726173	74.0825565559329	63.7907105276751	91.3297559769321	105.449093135694	77.7189911619941
FBgn0038343	64.2347914651682	-0.345138932806391	0.19009602058664	-1.8156031448806	0.0694312708571086	1	141.918727269542	142.466454915255	138.675457668859	109.595707172319	126.054088346117	97.9935105955578
FBgn0030156	59.71310160409	-0.413839997565288	0.228081735187222	-1.81443725524793	0.0696104344511677	1	91.8981922483099	96.8771893423737	130.354930208727	78.1376801135975	64.2391027148481	95.7407862140507
FBgn0050489	118.350623499923	-0.311092128685564	0.171463644454761	-1.81433288482121	0.0696264916684527	1	159.367751114158	127.649943604069	149.769494282368	119.743457836422	101.812917510325	129.531651936657
FBgn0032782	392.607808091261	-0.181125260699585	0.0998786488523132	-1.81345325333153	0.0697619423697707	1	503.695154981243	592.660452447463	514.485947951466	479.988606412099	464.218421505412	477.5775688795
FBgn0032381	1114.03223530283	-0.407302507756574	0.22465974725881	-1.81297501099455	0.0698356755946271	1	76.7757049163095	142.466454915255	62.4039559509865	75.0933549143664	67.8752783402169	70.9608180174729
FBgn0011703	1378.87789414261	-0.4677143758211	0.258088712745807	-1.8122232888261	0.0699517019841222	1	58.163412815386	44.4495339335597	106.780102405021	47.6944281212868	58.1788100059002	43.928125439388
FBgn0031836	1438.95894677442	-0.184366411136943	0.10177279044173	-1.81154914134444	0.0700558894429005	1	1655.33072872589	1722.13450701561	1583.67372657837	1447.06924470117	1424.16878660277	1495.8089893207
FBgn0000644	239.950734060014	-1.60037759555081	0.883804458550544	-1.81078244182595	0.0701745352807983	1	4.65307302523088	2.27946327864409	6.93377288344294	1.01477506641036	1.21205854178959	2.25272438150707
FBgn0032734	22.7950070500736	0.471221859226376	0.260240685364908	1.81071556342403	0.0701848924478227	1	44.2041937396934	55.8468503267801	37.4423735705919	69.0047045159043	58.1788100059002	64.2026448729516
FBgn0261436	303.834454875789	0.287253563843145	0.159261955021258	1.80365463807601	0.0712854649185042	1	339.674330841854	296.330226223731	343.91513501877	400.836151232091	378.162265038351	415.627648388055
FBgn0036428	3312.70975381054	0.358264410554893	0.1986379014125	1.80360549526199	0.0712931739963068	1	5227.7275438469	5677.0032954631	4336.38156130522	6596.03793166732	6208.16385104627	6734.5195385154
FBgn0039161	14.1156781109486	0.565228369467849	0.314086878605889	1.79959243116644	0.0719250170839733	1	29.081706407693	23.9343644257629	19.4145640736402	35.5171273243625	37.5738147954772	34.9172279133597
FBgn0032321	156.260553034531	-0.335753213063237	0.187050030889153	-1.79499148686164	0.072655056309718	1	105.857411324003	119.671822128815	109.553611558399	90.3149809105218	90.9043906342191	84.4771643065153
FBgn0039131	101.370294360923	-0.331274902437471	0.184564330994485	-1.79490208456026	0.0726693017673144	1	172.163701933543	177.798135734239	201.079413619845	172.511761289761	126.054088346117	137.416187271932
FBgn0050154	38.192728551965	-0.722379344593719	0.402519789376469	-1.79464305522155	0.0727105886854209	1	34.8980476892316	33.0522175403393	38.8291281472805	19.2807262617968	20.604995210423	24.7799681965778
FBgn0260959	366.486187287831	-0.299435369223385	0.16689111672272	-1.79419597102271	0.0727818950018137	1	196.592335316005	180.077599012883	189.985377006337	152.216259961554	152.719376265488	155.437982323988
FBgn0054043	47.6274769811358	-1.60234644678324	0.89446729962571	-1.79139745796604	0.0732295365712799	1	5.8163412815386	2.27946327864409	5.54701830675435	2.02955013282071	0	2.25272438150707
FBgn0038363	128.225235726766	-0.337373195164047	0.188493086757706	-1.78984386625126	0.0734790150006589	1	112.837020861849	113.973163932204	113.713875288464	101.477506641036	90.9043906342191	76.5926289712405
FBgn0025709	72.3859394436829	-0.552782704647015	0.308918177009348	-1.78941462751895	0.073548065319221	1	45.3674619960011	43.3098022942377	34.6688644172147	29.4284769259004	29.0894050029501	25.9063303873314
FBgn0052115	63.0381898757313	-0.428549657452007	0.239532420777708	-1.78910919891597	0.0735972309886796	1	89.5716557356945	90.0387995064415	94.299311214824	82.1967803792389	63.0270441730585	57.4444717284304
FBgn0034647	176.303049160714	0.526970277541107	0.294913468071269	1.78686406215181	0.0739594622064469	1	104.694143067695	95.7374577030517	140.062212245547	110.610482238729	209.686127729599	170.080690803784
FBgn0036126	150.764851808208	-0.4886675609145	0.273500163842035	-1.78671761672779	0.0739831403100895	1	144.245263782157	148.165113111866	246.842314650569	144.098059430271	127.266146887907	111.5098568846
FBgn0036500	260.388870105638	-0.253192316739025	0.142091454649613	-1.78189685905727	0.074766052849239	1	151.224873320004	169.820014258985	160.863530895876	139.024184098219	132.114381055065	132.910738508917
FBgn0261456	529.170703645134	-0.173418277129578	0.0973686021756233	-1.78104926284948	0.0749044032954278	1	385.041792837855	455.892655728818	446.534973693726	371.407674306191	393.919026081616	376.204971711682
FBgn0011774	363.143994565983	-0.337940374957315	0.189813701473657	-1.78037924730221	0.0750139157163444	1	105.857411324003	124.230748686103	181.664849546205	103.507056773856	126.054088346117	94.6144240232971
FBgn0000810	121.475449439645	0.407917632166363	0.229170620991414	1.77997349922809	0.0750802977977799	1	107.02067958031	78.641483113221	84.5920291780039	112.64003237155	126.054088346117	120.520754410629
FBgn0033740	130.860169249508	0.604345779541858	0.339570502522877	1.77973579875697	0.0751192088653322	1	11.6326825630772	15.9562429505086	13.8675457668859	27.3989267930796	8.48440979252711	25.9063303873314
FBgn0015222	6182.58979566617	-0.250319820882209	0.140650743445568	-1.77972625490659	0.0751207715173525	1	5009.03311166104	5175.5213741614	6545.48160197014	4762.33938666381	4649.45656630486	4650.74948562136
FBgn0037999	192.320818727041	-0.498225889152215	0.280049465580388	-1.77906388115995	0.0752292894298486	1	123.306435168618	134.488333440001	223.267486846863	120.758232902832	130.902322513275	87.8562508787759
FBgn0038136	143.178374589626	-2.57284242766412	1.44670036296666	-1.77842108395421	0.0753347224173792	1	3.48980476892316	0	0	0	0	0
FBgn0039768	129.912898638929	-2.57353510597411	1.4473797015544	-1.77806494260649	0.0753931894030754	1	2.32653651261544	0	1.38675457668859	0	0	0
FBgn0034578	38.1522467937792	-0.694393614353982	0.39081817097392	-1.77676900903444	0.0756062528224531	1	16.2857555883081	14.8165113111866	29.1218461104604	14.206850929745	7.27235125073752	14.642708479796
FBgn0051344	292.524734999131	-0.238062011474389	0.134113521691746	-1.77507836996156	0.0758849479117992	1	295.470137102161	287.212373109155	317.566798061687	251.664216469769	267.864937735499	243.294233202764
FBgn0005390	791.450508365733	-1.12663748089329	0.634930852509422	-1.77442547710591	0.075992798791138	1	12.7959508193849	5.69865819661022	2.77350915337718	3.04432519923107	2.42411708357917	4.50544876301415
FBgn0015270	203.424075006776	1.34921959285815	0.761033970016475	1.77287696215314	0.0762490968841687	1	1.16326825630772	0	5.54701830675435	5.07387533205179	7.27235125073752	3.37908657226061
FBgn0285954	146.521285517412	0.555595600381353	0.313543533191769	1.77198870831611	0.0763964316320992	1	146.571800294773	172.099477537629	170.570812932696	259.782417001051	247.259942525076	211.756091861665
FBgn0000808	38.2646619963704	2.34407369492947	1.32592454543735	1.76787864965295	0.0770811927983848	1	0	1.13973163932204	0	0	4.84823416715835	2.25272438150707
FBgn0022069	567.658688775315	0.311091188091868	0.176155038731349	1.76600788902955	0.0773945253450327	1	237.306724286775	177.798135734239	169.184058356008	242.531240872075	269.076996277288	215.135178433926
FBgn0003638	391.398558107281	0.409159670877956	0.231710185161154	1.76582514313467	0.0774251888969332	1	405.980621451394	437.656949499665	474.270065227497	574.362687588262	578.151924433633	596.971961099375
FBgn0035926	494.14676292386	-2.57165398908064	1.4566920610923	-1.7654067443412	0.077495430717026	1	3.48980476892316	0	0	0	0	0
FBgn0267826	11.1674690820782	-2.58102235933803	1.4622828800158	-1.76506365123425	0.077553068762718	1	0	0	4.16026373006577	0	0	0
FBgn0001230	323.398587305529	0.53987261395181	0.306282177569446	1.76266414923669	0.0779571507185464	1	451.348083447395	439.936412778309	553.315076098747	428.235078025171	951.465955304826	720.871802082264
FBgn0030662	173.501555613169	0.266326044533185	0.151202010686831	1.76139221511279	0.0781720417534005	1	278.021113257545	273.535593437291	305.086006871489	330.816671649776	357.557269827928	341.287743798322
FBgn0044872	14.339658141414	-2.57006769771454	1.46320786543641	-1.75646110058874	0.07900970786493	1	1.16326825630772	2.27946327864409	0	0	0	0
FBgn0039184	103.708116070845	2.34444069821967	1.33643714333012	1.75424688689647	0.0793882123332313	1	0	0	1.38675457668859	1.01477506641036	3.63617562536876	2.25272438150707
FBgn0024491	287.883041912396	0.450897707764387	0.257060331301747	1.75405402101931	0.0794212511043214	1	100.041070042464	123.091017046781	221.880732270174	193.822037684378	230.291122940022	181.34431271132
FBgn0265267	13.609836901018	-2.57333141209094	1.46712143993029	-1.75400027704129	0.0794304596750549	1	0	2.27946327864409	1.38675457668859	0	0	0
FBgn0262987	24.3386797976342	2.34089415255449	1.33541035487078	1.75293994390287	0.0796123162723663	1	0	0	1.38675457668859	1.01477506641036	0	5.63181095376769
FBgn0025807	66.9521833190792	-0.524110562155321	0.299155956570979	-1.75196432042618	0.0797799432637672	1	20.938828613539	22.7946327864409	36.0556189939033	19.2807262617968	24.2411708357917	11.2636219075354
FBgn0002985	27.1908428694173	-0.65344467044973	0.373080064948481	-1.75148642836214	0.0798621570228052	1	20.938828613539	25.074096065085	12.4807911901973	12.1773007969243	10.9085268761063	14.642708479796
FBgn0034687	14.5802273696065	0.582022277430697	0.332440700673162	1.75075517604239	0.079988090679271	1	26.7551698950776	13.6767796718645	16.6410549202631	27.3989267930796	31.5135220865293	27.0326925780849
FBgn0001276	83.6625572942223	-0.405367848995982	0.23171314595476	-1.7494382864023	0.0802152876636742	1	62.8164858406169	56.9865819661022	49.9231647607892	49.7239782541075	42.4220489626356	36.0435901041132
FBgn0003979	587.566100564456	-2.56991019480861	1.4718414515367	-1.74605097045301	0.0808020953341711	1	3.48980476892316	0	0	0	0	0
FBgn0028398	136.169631278057	0.308215194363027	0.176529336132506	1.74597152584133	0.080815899785207	1	102.367606555079	88.8990678671194	104.006593251644	125.832108234884	133.326439596855	105.878045930833
FBgn0260944	343.103222058318	0.230260599595122	0.132039670722303	1.74387438514135	0.0811809960603248	1	229.163846492621	247.321765732884	249.615823803946	283.12224352849	272.713171902657	295.106893977427
FBgn0264712	236.731400201753	0.295569375139617	0.169696994897013	1.74174784485131	0.0815525765125193	1	172.163701933543	160.702161144408	194.145640736402	219.191414344637	210.898186271388	215.135178433926
FBgn0083039	61.9249376331569	-0.791611717236377	0.454869197086509	-1.74030627333472	0.0818052530951527	1	15.1224873320004	20.5151695077968	36.0556189939033	17.2511761289761	13.3326439596855	10.1372597167818
FBgn0038799	237.274214169743	-0.229765846359582	0.132045991896481	-1.74004407903353	0.0818512783225457	1	513.001301031705	435.377486221021	490.91112014776	411.998676962605	424.220489626356	390.847680191478
FBgn0031003	178.235572826341	0.397571459967149	0.228732598567002	1.73814953556212	0.0821844684478309	1	58.163412815386	38.7508757369495	61.0172013742979	40.5910026564143	82.4199808416919	85.6035264972688
FBgn0035440	313.548421459555	-0.229614924288489	0.132138016126629	-1.73769011386131	0.0822654316318438	1	279.184381513853	312.28646917424	280.124424491095	229.339165008741	247.259942525076	268.074201399342
FBgn0027514	218.309559171854	0.323969868426036	0.186614334550268	1.736039566343	0.0825568387966561	1	73.2859001473864	80.9209463918651	108.16685698171	99.447956508215	128.478205429696	99.1198727863113
FBgn0010269	236.502712268403	0.288918206577314	0.166431695963983	1.73595663316342	0.0825715028502456	1	138.428922500619	145.885649833222	126.194666478662	164.393560758478	163.627903141594	174.586139566798
FBgn0036332	134.20882307851	0.370926891850206	0.213673514119791	1.73595166147852	0.0825723819991831	1	47.6939985086165	95.7374577030517	85.9787837546925	106.551381973087	89.6923320924295	99.1198727863113
FBgn0037974	148.489745430352	-0.67442617589189	0.388992332560713	-1.73377755662222	0.0829575592945723	1	172.163701933543	139.047259997289	373.03698112923	142.06850929745	173.324371475911	112.636219075354
FBgn0051266	41.201115450369	-2.56880479217825	1.48167047175279	-1.73372206651281	0.0829674092727439	1	3.48980476892316	0	0	0	0	0
FBgn0037540	101.148983694514	0.475915837962278	0.274642768010691	1.73285406861233	0.0831216098559937	1	37.2245842018471	28.4932909830511	20.8013186503288	33.4875771915418	44.8461660462147	43.928125439388
FBgn0040827	3399.83978984405	-0.385704333414139	0.222605311315507	-1.73268252736102	0.0831521117699005	1	4960.17584489612	5657.62785759463	4334.99480672853	4513.71949539327	3931.91790956542	2999.50251397667
FBgn0086856	197.092659573174	0.39986076719654	0.230978441267083	1.73116055768243	0.083423131965812	1	68.6328271221555	71.8030932772888	56.8569376442321	96.4036313089839	77.5717466745336	86.7298886880224
FBgn0035205	635.111833824999	-0.207238546586263	0.119742300141049	-1.73070457425779	0.083504468992855	1	597.919883742168	564.167161464412	579.66341305583	513.476183603641	498.15606067552	496.72572612231
FBgn0031031	8.05974520764539	1.22905830020975	0.711230998474074	1.72807189625686	0.083975335319676	1	3.48980476892316	3.41919491796613	1.38675457668859	8.11820053128286	6.06029270894794	5.63181095376769
FBgn0034707	132.261744092102	-0.330724338327001	0.191397803115776	-1.72794218608114	0.0839985900141772	1	81.4287779415404	99.1566526210178	80.4317654479381	63.9308291838525	69.0873368820065	75.466266780487
FBgn0036843	342.701151700067	-0.209374393142425	0.121232143931675	-1.72705345589224	0.0841580635584425	1	322.225306997239	341.919491796613	350.848907902213	325.742796317725	296.954342738449	253.431492919546
FBgn0038611	878.716354892638	-2.34520225349138	1.35802949596386	-1.72691554967065	0.0841828313681148	1	3.48980476892316	2.27946327864409	0	0	0	1.12636219075354
FBgn0032169	83.2395031033193	0.420188484634323	0.243473314714204	1.72580919238543	0.084381745533692	1	34.8980476892316	30.7727542616952	24.9615823803946	40.5910026564143	38.7858733372668	42.8017632486344
FBgn0037359	74.1862406798998	-0.446577827499711	0.258832081768469	-1.72535732220083	0.0844630974843224	1	25.5919016387698	44.4495339335597	42.9893918773463	22.3250514610279	35.149697711898	25.9063303873314
FBgn0266361	33.1536049965487	0.37689777558692	0.21856295163531	1.72443578734151	0.0846292016773332	1	47.6939985086165	60.4057768840683	47.149655607412	66.9751543830836	67.8752783402169	67.5817314452123
FBgn0033457	210.522950467458	-0.295959830267077	0.171647758795643	-1.724227757727	0.0846667349971544	1	104.694143067695	110.553969014238	141.448966822236	111.625257305139	79.9958637581128	95.7407862140507
FBgn0030999	640.070388062943	-2.34536125911107	1.36024229254117	-1.72422315639777	0.0846675653348163	1	5.8163412815386	0	0	1.01477506641036	0	0
FBgn0038660	31.3715382182066	-0.420974523217302	0.244165367988505	-1.72413691051026	0.0846831301452958	1	54.6736080464629	56.9865819661022	61.0172013742979	44.6501029220557	37.5738147954772	46.180849820895
FBgn0033494	232.269328270676	0.264072604584008	0.153502698573821	1.7203124572889	0.0853756602447286	1	500.20535021232	411.443121795258	303.699252294801	447.515804286967	482.399299632256	533.895678417177
FBgn0034494	658.234760414073	-0.153321031119807	0.0892080751263141	-1.71869005023045	0.0856708247202527	1	754.96109834371	679.280057035938	685.056760884163	662.648118365963	627.846324647006	614.993756151432
FBgn0287825	1202.5861467122	0.172054254211437	0.100146036011177	1.71803359438246	0.08579048783817	1	1149.30903723203	1230.91017046781	1167.64735357179	1348.63606325936	1335.68851305213	1313.33831441862
FBgn0033830	1284.76012913551	-0.654695105747841	0.381604752373759	-1.71563666771793	0.086228562921686	1	1540.16717135142	1401.86991636611	2555.78868483707	1157.85835077422	1469.01495264898	865.046162498717
FBgn0031611	147.977110768795	-0.228915067505211	0.133450928776386	-1.71535012610356	0.0862810534968623	1	191.939262290774	159.562429505086	198.305904466468	157.290135293605	146.65908355654	163.322517659263
FBgn0015872	455.851957113016	-0.257276446236926	0.150001502698255	-1.71515912580201	0.0863160565202847	1	951.553433659715	816.047853754583	628.199823239931	623.071890775959	741.779827575228	643.15281092027
FBgn0034158	370.555818277278	0.239182650831538	0.139513358675246	1.71440680019968	0.0864540405014737	1	446.695010422165	416.002048352546	403.545581816379	450.560129486199	517.548997344154	528.263867463409
FBgn0035923	174.705993670016	0.341358120103039	0.199166507913594	1.71393334993418	0.0865409672691664	1	91.8981922483099	85.4798729491533	130.354930208727	120.758232902832	122.417912720748	144.174360416453
FBgn0035360	138.614487870517	-1.25195042809298	0.73060527502502	-1.71357978225672	0.0866059292890888	1	3.48980476892316	5.69865819661022	6.93377288344294	2.02955013282071	1.21205854178959	3.37908657226061
FBgn0030341	253.577050573816	0.223912795386865	0.130671960490604	1.71354890939258	0.0866116035191292	1	200.082140084928	200.59276852068	224.654241423551	243.546015938486	255.744352317603	229.777886913722
FBgn0039543	383.211962197352	0.281012569844373	0.164012686800406	1.71335873661011	0.0866465626499677	1	390.858134119394	416.002048352546	282.897933644472	443.456704021326	515.124880260575	369.44679856716
FBgn0034066	583.712407907764	-0.264890538818759	0.154613571740256	-1.71324247824611	0.0866679398332819	1	589.777005948014	568.7260880217	622.652804933176	504.343208005947	506.640470468048	470.819395734979
FBgn0029831	1184.89809394625	-0.432797470577353	0.252657744464823	-1.71297923795726	0.0867163592791781	1	2238.12812513605	1709.59745898307	1059.48049659008	1296.88253487244	1389.01908889087	1024.98959358572
FBgn0039681	68.0830460308034	0.324929381561493	0.189753347015025	1.71237760320383	0.0868271037551862	1	98.8778017861562	111.69370065356	115.100629865153	146.127609563091	138.174673764013	122.773478792136
FBgn0014455	2286.66173231707	-0.27031451085771	0.157866546323857	-1.71229761562764	0.0868418358720116	1	1955.45393885328	1575.10912554306	2098.15967452983	1366.90201445475	1716.27489517406	1583.66524019947
FBgn0262109	5154.25405900626	0.328091219880351	0.19168014782083	1.71165988554552	0.0869593652330898	1	9781.92276729162	9648.96805850042	8057.0440905607	11314.7419904755	11720.6060991053	11473.1252750155
FBgn0038407	544.882410188317	0.154396149927524	0.0902675659813936	1.71042775163949	0.087186802880355	1	771.246853932019	765.899661624414	705.858079534492	838.204204854955	808.443047373655	851.529816209674
FBgn0030850	1148.12310287024	-0.1644851739256	0.0961983404011389	-1.70985459041924	0.0872927652788609	1	1183.04381666495	1200.13741620611	1198.15595425894	1046.23309346908	1111.45768282105	1038.50593987476
FBgn0036121	42.6356181541252	0.419267889449806	0.245562185882991	1.70737969261108	0.0877515023671633	1	26.7551698950776	34.1919491796613	44.3761464540348	41.6057777228246	50.9064587551627	47.3072120116486
FBgn0040732	1033.70550056723	-0.322290450656475	0.188780440169325	-1.70722374821988	0.0877804725911682	1	1462.2281981788	1622.97785439459	1610.02206353545	1447.06924470117	1216.90677595675	1090.31860064942
FBgn0036680	58.4395871909013	0.342821699286075	0.200934370697402	1.70613767120185	0.0879824501579888	1	105.857411324003	117.392358850171	95.6860657915126	129.891208500526	143.022907931171	132.910738508917
FBgn0031776	269.941980959046	-0.408410603561502	0.239909761555836	-1.70235092108351	0.0886896044779438	1	108.183947836618	107.134774096272	151.156248859056	111.625257305139	65.4511612566377	96.8671484048042
FBgn0033188	1411.81067439061	-0.225743910347035	0.132614182902452	-1.70226068891204	0.088706510538201	1	2407.96529055698	2576.93323650714	1958.09746228429	2075.21501080918	1986.56394999313	1877.64577198615
FBgn0052750	22.6605773896904	-0.567384108822968	0.333714087851674	-1.70021023827784	0.0890913871512834	1	30.2449746640007	23.9343644257629	26.3483369570832	18.2659511953864	12.1205854178959	23.6536060058243
FBgn0023178	104.902752327687	-0.284116024280216	0.167122409088634	-1.70004744324583	0.0891220018899594	1	182.633116240312	209.710621635256	178.891340392828	171.49698622335	144.234966472961	153.185257942481
FBgn0265192	733.867053133594	-0.169302046854909	0.0996372375975483	-1.69918447095802	0.0892844313936576	1	575.817786872322	566.446624743056	590.757449669339	481.003381478509	543.002226721735	518.126607746627
FBgn0052707	174.134311821043	-0.29292805885864	0.172411975722611	-1.69900065022121	0.0893190611011436	1	96.5512652735408	74.0825565559329	85.9787837546925	66.9751543830836	78.7838052163232	64.2026448729516
FBgn0002989	130.415406380168	-0.360056570067379	0.211950251232444	-1.69877868968652	0.0893608903233165	1	54.6736080464629	64.9647034413565	81.8185200246267	51.7535283869282	55.754692922321	48.4335742024021
FBgn0050094	56.6007476313479	0.460498896105372	0.271431275465009	1.69655797887129	0.0897802599764908	1	27.9184381513853	33.0522175403393	23.574827803706	33.4875771915418	48.4823416715835	36.0435901041132
FBgn0027784	119.463199706096	-0.317138107754755	0.187035535612929	-1.69560349435988	0.0899609955787207	1	63.9797540969246	80.9209463918651	94.299311214824	74.0785798479561	58.1788100059002	57.4444717284304
FBgn0039877	493.006870360597	0.18253029376451	0.107664017408291	1.69536952231966	0.0900053438187209	1	373.409110274778	335.081101960681	296.765479411358	365.319023907729	380.58638212193	398.732215526752
FBgn0013983	291.296925179043	-0.212365948763565	0.125355029155253	-1.69411590579703	0.0902432604224148	1	255.919016387698	257.579350486782	245.45556007388	215.132314078996	232.715240023601	208.377005289404
FBgn0033235	388.317801380627	-0.197625331713698	0.116713067476669	-1.69325797004867	0.0904063745612721	1	312.919160946777	300.88915278102	320.340307215064	279.063143262848	258.168469401182	275.958736734617
FBgn0037244	316.596063143507	-0.196701631828611	0.116574779117395	-1.68734295117579	0.0915374266134318	1	208.225017879082	210.850353274578	228.814505153617	181.644736887454	192.717308144544	190.355210237348
FBgn0034503	172.567726101687	0.260358399300453	0.154399459570989	1.68626496507098	0.0917447759115604	1	95.3879970172331	98.0169209816958	97.0728203682012	116.699132637191	113.933502928221	117.141667838368
FBgn0011336	973.806608154538	0.141228808589812	0.0838857270010999	1.68358567826396	0.0922617684535822	1	1079.51294185356	1023.4790121112	1012.33084098267	1177.13907703601	1099.33709740316	1159.02669428539
FBgn0016034	211.317363724148	-0.569243970103207	0.338512416595111	-1.68160440266529	0.0926455763162615	1	23.2653651261544	18.2357062291527	19.4145640736402	14.206850929745	12.1205854178959	14.642708479796
FBgn0036839	19.2029920618628	-0.635817248034153	0.378122145886767	-1.68151285226376	0.0926633421755172	1	30.2449746640007	33.0522175403393	33.2821098405261	25.3693766602589	24.2411708357917	12.3899840982889
FBgn0033032	260.716449687591	-0.217053459087124	0.129092214365581	-1.68138303424281	0.0926885387659905	1	214.041359160621	258.719082126104	231.588014306994	196.866362883609	204.83789356244	204.997918717144
FBgn0034729	92.4704547737299	0.44168692217015	0.262957800061108	1.67968747102199	0.0930181387490009	1	24.4286333824621	28.4932909830511	37.4423735705919	34.5023522579521	41.209990420846	46.180849820895
FBgn0000405	6282.50040300952	-1.37126216385446	0.816975529477758	-1.67846173401427	0.0932569946825924	1	43.0409254833856	13.6767796718645	6.93377288344294	8.11820053128286	13.3326439596855	3.37908657226061
FBgn0030500	172.709488243352	-1.13487969760013	0.676327770009291	-1.67800251287115	0.0933466084552231	1	3.48980476892316	7.97812147525431	5.54701830675435	4.05910026564143	2.42411708357917	1.12636219075354
FBgn0038422	36.2990110659176	0.397679218388895	0.237375151059379	1.67531949580272	0.0938715622984022	1	73.2859001473864	78.641483113221	73.4979925644952	101.477506641036	86.0561564670607	109.257132503093
FBgn0044030	138.615563836199	-0.343553433551646	0.205286884047277	-1.67352841437511	0.0942233176688505	1	96.5512652735408	67.2441667200006	90.1390474847583	72.0490297151353	59.3908685476898	67.5817314452123
FBgn0038042	98.0239021811588	-0.251964010610568	0.150651572220961	-1.67249506192349	0.0944267407985723	1	160.531019370465	173.239209176951	183.051604122894	158.304910360016	128.478205429696	145.300722607206
FBgn0041160	125.838784653973	0.235087664489994	0.140660925743743	1.6713075308368	0.0946609497084342	1	157.041214601542	196.033841963392	188.598622429648	224.265289676689	202.413776478861	209.503367480158
FBgn0036422	399.736578330834	-1.94071870446255	1.16192635029087	-1.67025965456135	0.0948680018436795	1	4.65307302523088	3.41919491796613	0	1.01477506641036	0	1.12636219075354
FBgn0034507	21.8971342943667	-1.03894231801523	0.622168492459524	-1.66987292125343	0.0949445089235715	1	12.7959508193849	11.3973163932204	29.1218461104604	10.1477506641036	13.3326439596855	2.25272438150707
FBgn0034484	66.5007802819202	-0.46882015255196	0.281505311579178	-1.66540428641289	0.0958321248275679	1	94.2247287609253	93.4579944244076	108.16685698171	72.0490297151353	72.7235125073752	68.7080936359658
FBgn0039509	241.333682920105	-0.220005863381282	0.13231431542973	-1.66275177910075	0.0963621327442801	1	275.69457674493	258.719082126104	292.605215681292	254.708541669	207.262010646019	245.546957584271
FBgn0013770	7447.80075459218	-0.17482046892721	0.105145744696905	-1.66264901571766	0.0963827133967974	1	7005.20143948509	7660.13634788346	7953.03749730906	6857.84989880119	6417.84997877587	6759.29950671198
FBgn0266369	1073.94345172525	0.216641921553006	0.130498289944458	1.66011310680938	0.0968917006630762	1	1993.84179131143	1811.03357488273	1596.15451776857	2007.22508135969	2077.46834062735	2194.15354758789
FBgn0038128	84.1458187506961	0.399148853065438	0.240732764134833	1.65805786553374	0.0973057872750893	1	37.2245842018471	36.4714124583054	29.1218461104604	46.6796530548764	36.3617562536876	52.9390229654163
FBgn0037530	1324.02037736808	0.141805315061651	0.0855321936593062	1.65791743429957	0.097334132683538	1	1234.22761994249	1123.77539637154	1096.92287016067	1216.71530462602	1266.60117617012	1331.36010947068
FBgn0036689	267.253867824711	0.68988920401545	0.416480187729205	1.65647544431097	0.0976255738498346	1	10.4694143067695	10.2575847538984	4.16026373006577	11.1625257305139	21.8170537522126	9.0108975260283
FBgn0083120	34.4674977595636	-0.575544755843735	0.347557506365478	-1.65596986197304	0.0977279222659547	1	23.2653651261544	19.3754378684747	34.6688644172147	17.2511761289761	19.3929366686334	14.642708479796
FBgn0030959	240.701847642152	-0.315773040324124	0.190718932900507	-1.65569844336773	0.0977829027111593	1	101.204338298772	109.414237374916	117.87413901853	96.4036313089839	99.3888004267462	67.5817314452123
FBgn0051410	908.061522573382	-1.94490852648719	1.17494138371191	-1.65532387696037	0.097858818081127	1	5.8163412815386	0	2.77350915337718	2.02955013282071	0	0
FBgn0001269	44.0618844166365	0.351107079808628	0.212145184884546	1.65503204798029	0.0979179972472196	1	123.306435168618	100.29638426034	79.0450108712495	125.832108234884	118.78173709538	143.047998225699
FBgn0033792	78.7730988242759	0.531673001105151	0.321247637822502	1.65502540254915	0.0979193451881329	1	19.7755603572312	29.6330226223731	8.32052746013153	31.4580270587211	35.149697711898	19.1481572428101
FBgn0038828	122.13632250144	0.313459329500674	0.189420434901164	1.65483375468033	0.0979582248921387	1	91.8981922483099	80.9209463918651	66.5642196810523	81.1820053128286	99.3888004267462	119.394392219875
FBgn0030040	1017.49094069163	-0.52483514054346	0.317193056530464	-1.65462367393611	0.0980008582521082	1	343.164135610777	366.993587861698	872.268628737122	393.732725767219	374.526089412983	330.024121890786
FBgn0034946	145.208854710859	0.285792588521248	0.172743150127566	1.6544365916113	0.0980388368363911	1	91.8981922483099	100.29638426034	115.100629865153	116.699132637191	130.902322513275	126.152565364396
FBgn0028895	77.0488266328969	0.411483013392547	0.248815367606565	1.65376848444183	0.0981745616858307	1	22.1020968698467	43.3098022942377	45.7629010307234	51.7535283869282	49.6944002133731	45.0544876301415
FBgn0052054	82.9545438358538	-1.94238879727615	1.17521817844717	-1.65278995245177	0.0983736196597857	1	5.8163412815386	1.13973163932204	1.38675457668859	2.02955013282071	0	0
FBgn0029823	5934.31988488164	-0.246057564108641	0.14891662293018	-1.65231764773503	0.0984698135645785	1	9115.37005642729	8453.3895688516	9316.21724619394	7326.67597948278	7440.82738804628	7901.43076813607
FBgn0001253	23.6259865570394	-0.530238838462821	0.320974984340568	-1.65196312588714	0.0985420680712981	1	67.4695588658478	77.501751473899	51.3099193374778	51.7535283869282	48.4823416715835	36.0435901041132
FBgn0037236	384.483119329651	0.31787105971934	0.192564154472683	1.65072809417618	0.098794108503742	1	60.4899493280015	50.1481921301699	65.1774651043637	63.9308291838525	60.6029270894794	93.4880618325436
FBgn0027073	1244.74645728927	-0.198554436593134	0.120302591913975	-1.65045850994727	0.0988491925651353	1	1971.73969444159	1985.412515699	2053.7835280758	1737.29491369453	1678.70108037858	1821.32766244847
FBgn0039107	13.566360034226	1.6025769923894	0.971110449828321	1.65025203124188	0.098891398872618	1	2.32653651261544	1.13973163932204	0	5.07387533205179	3.63617562536876	2.25272438150707
FBgn0030855	276.791978996116	-0.322874648594292	0.195719032975295	-1.64968446699329	0.0990074887870482	1	132.61258121908	105.99504245695	145.609230552302	89.3002058441114	117.56967855359	100.246234977065
FBgn0028952	32.4705340844744	1.60509236118571	0.972974400343698	1.64967584000022	0.099009254195991	1	0	1.13973163932204	2.77350915337718	2.02955013282071	7.27235125073752	2.25272438150707
FBgn0267495	14.0207690787365	-0.681721610196067	0.413358261164836	-1.649227012604	0.0991011359119333	1	30.2449746640007	21.6549011471188	29.1218461104604	14.206850929745	23.0291122940022	13.5163462890425
FBgn0013278	42.0958475597715	0.845049913357712	0.512544746079245	1.64873392971442	0.0992021558254138	1	24.4286333824621	37.6111440976275	67.9509742577408	36.5319023907729	151.507317723698	45.0544876301415
FBgn0259749	984.105929315748	-0.148588425862016	0.0901368065142169	-1.64847670566828	0.0992548869766146	1	725.879391936017	816.047853754583	837.599764319908	713.386871686481	738.143651949859	693.839109504179
FBgn0000636	725.402060567519	0.231392634176792	0.140449963573912	1.64750939258893	0.0994533872298502	1	1158.61518328249	1040.57498670103	851.467310086793	1031.01146747292	1295.69058117307	1259.27292926245
FBgn0033397	112.235216076551	-0.31057634034286	0.188575078124282	-1.6469638694153	0.0995654724745469	1	187.286189265543	186.915988848815	144.222475975613	145.112834496681	150.295259181909	123.899840982889
FBgn0036995	124.062737224971	-0.357458633306926	0.217094037013847	-1.64656127005518	0.0996482566646362	1	342.00086735447	313.426200813562	242.682050920503	217.161864211816	289.681991487711	195.987021191116
FBgn0037439	311.237695292542	0.213874793073201	0.129937523906434	1.64598175063894	0.099767516296371	1	147.73506855108	141.326723275933	142.835721398925	176.570861555402	168.476137308753	155.437982323988
FBgn0003124	1091.60968891034	1.04379007874268	0.634145173583989	1.6459796939611	0.0997679397439146	1	6.97960953784632	2.27946327864409	0	5.07387533205179	14.544702501475	1.12636219075354
FBgn0030503	107.202691292789	-0.359703439831457	0.218668508396663	-1.64497138828494	0.0999757115713907	1	59.3266810716937	67.2441667200006	54.083428490855	45.6648779884661	52.1185172969523	43.928125439388
FBgn0051706	461.869891979337	-0.242820916695858	0.147683391249644	-1.64419921997453	0.100135058031069	1	668.879247376939	769.31885654238	895.843456540828	652.50036770186	676.32866631859	642.026448729516
FBgn0033555	242.975474521163	-0.299437184160014	0.182157336702017	-1.64383817627862	0.100209633297947	1	187.286189265543	219.968206389154	202.466168196534	182.659511953864	141.810849389382	170.080690803784
FBgn0016122	1275.9069733804	0.318561525710081	0.19395231160825	1.64247346715579	0.100491920454965	1	2021.76022946282	1952.36029815866	1564.25916250473	2373.55888033383	2213.21889730779	2321.43247514304
FBgn0030679	1083.64582949024	-0.25583047653135	0.155810534756089	-1.64193311403389	0.100603866352791	1	1249.35010727449	1299.29406882713	1300.7757929339	1088.85364625831	1089.64062906884	1045.26411301928
FBgn0037535	117.531747769389	-0.325268251847102	0.198151794537433	-1.64151050262457	0.100691488738923	1	58.163412815386	63.8249718020345	83.2052746013153	52.7683034533386	53.3305758387418	56.3181095376769
FBgn0264385	11.8144844382626	0.805851235236933	0.491049234526087	1.64108032062134	0.100780743229034	1	9.30614605046176	11.3973163932204	6.93377288344294	19.2807262617968	18.1808781268438	11.2636219075354
FBgn0030510	271.768275841927	-0.349102966261866	0.212864169507426	-1.64002691044576	0.100999571792842	1	162.857555883081	177.798135734239	273.190651607652	165.408335824888	163.627903141594	150.932533560974
FBgn0086698	151.29259596561	-0.282075939313252	0.172201689219195	-1.6380555881435	0.101410098352672	1	160.531019370465	166.400819341018	165.023794625942	123.802558102064	139.386732305803	141.921636034946
FBgn0037282	187.964294579809	0.289756956139546	0.177018256380443	1.63687611698541	0.101656357144321	1	171.000433677235	164.121356062374	160.863530895876	189.762937418737	216.958478980336	200.49246995413
FBgn0052481	18.3997804412836	-0.828510698241887	0.50623044809544	-1.63662755047418	0.101708315410851	1	11.6326825630772	21.6549011471188	27.7350915337718	15.2216259961554	7.27235125073752	11.2636219075354
FBgn0032906	365.310606146757	-0.502524191921847	0.307260183201975	-1.63550052820061	0.1019441640508	1	30.2449746640007	15.9562429505086	52.6966739141664	16.2364010625657	27.8773464611605	24.7799681965778
FBgn0259111	626.538570649796	0.19778489062985	0.120966009783771	1.6350451749495	0.102039577877897	1	1254.00318029972	1225.2115122712	1102.46988846743	1342.5474128609	1318.71969346707	1448.50177730905
FBgn0004797	773.252169303293	0.221788413589519	0.135904819086728	1.63193928721531	0.102692276661266	1	1131.86001338741	1156.82761391187	988.756013178964	1265.42450781372	1250.84441512685	1307.70650346486
FBgn0034650	215.167317307561	-0.278815236568211	0.170894866058916	-1.63150153657682	0.102784535891906	1	87.245119223079	98.0169209816958	101.233084098267	79.1524551800078	77.5717466745336	78.8453533527476
FBgn0052699	537.720064097841	-0.213804789338953	0.131235020834742	-1.62917480394343	0.10327601921373	1	482.756326367704	477.547556875936	510.325684221401	456.648779884661	414.524021292039	395.353128954492
FBgn0030787	336.962352138541	-0.265681312884498	0.163251980191489	-1.62743087448534	0.103645618697791	1	122.143166912311	164.121356062374	131.741684785416	112.64003237155	122.417912720748	113.762581266107
FBgn0000360	4134.18819426354	-1.5744731570698	0.967715557447897	-1.62699994327059	0.103737109838933	1	11.6326825630772	0	1.38675457668859	0	0	4.50544876301415
FBgn0032521	305.240983116587	-0.205180008070707	0.126138404879133	-1.62662599283154	0.103816555375572	1	196.592335316005	217.68874311051	202.466168196534	172.511761289761	186.657015435596	176.838863948305
FBgn0029092	2968.32793927646	-0.141581609503651	0.0870924741846962	-1.62564688658861	0.104024794907158	1	3363.00852898562	3331.43558173833	3221.43088164759	3135.654955208	2954.99872488301	2898.12991680885
FBgn0036783	38.9135397764934	-2.16372390458921	1.33111705498228	-1.62549484020999	0.104057162377925	1	0	11.3973163932204	13.8675457668859	0	0	5.63181095376769
FBgn0035922	81.4347340869288	0.383579710699506	0.236216972687458	1.62384483356759	0.104408928801686	1	112.837020861849	141.326723275933	155.316512589122	184.689062086685	201.201717937072	147.553446988713
FBgn0052407	132.086395192649	0.293693166150479	0.181051413269005	1.62215340299007	0.104770506054175	1	162.857555883081	198.313305242036	177.504585816139	218.176639278227	219.382596063915	223.0197137692
FBgn0023529	1570.699059611	0.216248043224841	0.133428351844732	1.62070534661542	0.105080846431315	1	1982.20910874836	1660.58899849222	1683.52005609995	2113.77646333277	2145.34361896757	1929.45843276081
FBgn0032171	86.2293580679384	-0.379582799004175	0.234295772918308	-1.62010092745687	0.10521059823682	1	57.0001445590783	43.3098022942377	65.1774651043637	51.7535283869282	39.9979318790564	33.7908657226061
FBgn0039705	281.692443433919	0.200609872806243	0.123847479661214	1.61981393044908	0.105272252933335	1	187.286189265543	178.937867373561	188.598622429648	213.102763946175	214.534361896757	209.503367480158
FBgn0040075	369.582319949192	-0.249161312737656	0.15382704600565	-1.61974970726867	0.105286053729566	1	138.428922500619	127.649943604069	131.741684785416	114.66958250437	119.993795637169	100.246234977065
FBgn0034961	117.575293944201	-0.264482893670458	0.163462156980431	-1.61800687422791	0.105661116216854	1	97.7145335298485	111.69370065356	92.9125566381354	83.2115554456493	89.6923320924295	79.9717155435012
FBgn0050054	151.128979718548	-0.228990313154607	0.141573998747936	-1.6174602340809	0.105778972796765	1	243.123065568314	288.352104748477	235.74827803706	218.176639278227	214.534361896757	223.0197137692
FBgn0011722	1212.77845731152	0.378743019951376	0.234270371538557	1.61669193361501	0.105944795977585	1	2813.94591200838	2909.73487518918	1969.1914988978	2999.67509630902	3279.83041408262	3724.87976482195
FBgn0038586	125.789220842359	-0.351280315023119	0.217497638591733	-1.61509944336688	0.106289161494816	1	90.7349239920022	109.414237374916	117.87413901853	71.034254648725	82.4199808416919	95.7407862140507
FBgn0021765	1201.04536990245	0.202749954779681	0.125537286498989	1.6150576488788	0.106298211214285	1	966.675920991716	1021.19954883255	990.142767755652	1147.71060011011	1094.488863236	1184.93302467272
FBgn0030851	131.939581895366	-0.363764514243954	0.225439079862177	-1.61358232328815	0.106618053580265	1	46.5307302523088	61.5455085233904	54.083428490855	58.8569538518007	39.9979318790564	25.9063303873314
FBgn0037562	205.008513648648	-0.67259511744569	0.417297518068576	-1.61178796499614	0.107008087970198	1	43.0409254833856	67.2441667200006	115.100629865153	57.8421787853904	56.9667514641106	25.9063303873314
FBgn0051015	112.392050311036	1.86043700140624	1.15782408551701	1.60683909125581	0.108089670503654	1	2.32653651261544	0	0	6.08865039846214	0	2.25272438150707
FBgn0039311	155.756127160619	-0.393939674064457	0.245197070222553	-1.60662471907555	0.108136716633544	1	143.08199552585	237.064180978985	277.350915337718	158.304910360016	156.355551890857	184.72339928358
FBgn0039111	156.319080448698	-0.267103726170767	0.166333634645429	-1.6058311161188	0.108311021855014	1	129.122776450157	134.488333440001	113.713875288464	92.3445310433425	113.933502928221	109.257132503093
FBgn0033548	192.357489252662	0.364271556926375	0.226930923912192	1.60520898010059	0.108447821869077	1	48.8572667649242	44.4495339335597	73.4979925644952	73.0638047815457	73.9355710491648	65.3290070637052
FBgn0032721	885.682616786977	0.136169891874161	0.0848607721301368	1.60462706685417	0.108575901106408	1	533.940129645244	463.870777204072	447.921728270414	528.697809599796	517.548997344154	545.159300324712
FBgn0027526	276.755602220175	-0.265560697579063	0.165499284958148	-1.60460329267415	0.108581136352375	1	124.469703424926	155.003502947798	108.16685698171	117.713907703601	110.297327302852	95.7407862140507
FBgn0028550	307.893432602386	0.24438964218973	0.152406253401445	1.60354077825138	0.108815313682394	1	502.531886724935	458.172119007462	429.893918773462	516.520508802872	581.788100059002	550.79111127848
FBgn0031549	139.621447433407	0.617855207725805	0.385375067525905	1.60325682637544	0.108877964051062	1	10.4694143067695	10.2575847538984	9.70728203682012	11.1625257305139	20.604995210423	15.7690706705495
FBgn0263659	438.81234003178	0.272599329723813	0.170146004368777	1.60214946413303	0.109122562076278	1	773.573390444634	796.672415886109	649.001141890259	919.386210167783	843.592745085553	919.111547654887
FBgn0034047	8.39519232094151	1.61882828619096	1.01065138201193	1.60176725130314	0.109207087382103	1	1.16326825630772	2.27946327864409	0	2.02955013282071	6.06029270894794	3.37908657226061
FBgn0052425	692.793385705456	0.188316738814357	0.11762791885667	1.60095273847207	0.109387387350549	1	937.594214584023	891.270141949838	854.240819240171	866.617906714445	1170.84855136874	1023.86323139497
FBgn0036745	274.171602280536	-0.291622950381454	0.1821772561368	-1.60076486256039	0.109429008810594	1	237.306724286775	237.064180978985	318.953552638375	229.339165008741	206.04995210423	210.629729670912
FBgn0015239	597.68951965206	-0.129438814611743	0.0808651351507504	-1.60067517812764	0.109448881642383	1	609.552566305245	615.455085233904	579.66341305583	591.613863717238	513.912821718785	542.906575943205
FBgn0000278	43.8394057659881	1.73642081148521	1.08663119078536	1.59798543076076	0.110046219547289	1	3.48980476892316	7.97812147525431	23.574827803706	7.1034254648725	59.3908685476898	49.5599363931557
FBgn0020307	114.512029478902	0.328177853067113	0.205452339502279	1.59734298408158	0.110189274242043	1	194.265798803389	202.872231799324	162.250285472565	210.058438746944	229.079064398232	264.695114827081
FBgn0030457	238.654239335877	0.217679627443385	0.136392886306112	1.59597493196851	0.110494390246221	1	164.020824139389	156.14323458712	144.222475975613	169.46743609053	187.869073977386	184.72339928358
FBgn0010611	687.77689215456	0.155141399515966	0.0972259661504486	1.59567866135573	0.110560555161353	1	595.593347229553	555.049308349835	522.806475411598	624.08666584237	647.23926131564	594.719236717868
FBgn0032919	299.9458263764	0.306074046826091	0.191922116013435	1.59478257734854	0.110760864427148	1	217.531163929544	183.496793930849	191.372131583025	231.368715141561	242.411708357917	259.063303873314
FBgn0034792	370.152105016125	0.239635425910151	0.15049204424828	1.59234614100134	0.111306950759969	1	267.551698950776	299.749421141698	317.566798061687	364.304248841318	367.253738162245	312.00232683873
FBgn0001280	178.527127831419	0.278268910922987	0.174821532841414	1.59173132966071	0.111445085620981	1	87.245119223079	86.6196045884753	106.780102405021	112.64003237155	100.600858968536	125.026203173643
FBgn0263239	29.9600408425836	0.484663160767702	0.304503052823311	1.59165287925349	0.1114627214653	1	74.4491684036941	45.5892655728818	59.6304467976093	57.8421787853904	104.237034593905	90.108975260283
FBgn0030501	158.862489425314	2.30274729183948	1.44767999513311	1.59064662051074	0.111689126246811	1	0	0	0	1.01477506641036	1.21205854178959	1.12636219075354
FBgn0036330	73.9396486388812	-1.27098429920862	0.799041875219685	-1.59063540801185	0.111691651063237	1	4.65307302523088	4.55892655728818	4.16026373006577	1.01477506641036	1.21205854178959	3.37908657226061
FBgn0037205	130.30223113392	2.30345140275689	1.44887213210947	1.5898238027418	0.111874526946965	1	0	0	0	0	1.21205854178959	2.25272438150707
FBgn0038488	419.477468239451	-0.191661517806749	0.120665702269708	-1.5883678145622	0.112203191011234	1	487.409399392935	467.289972122038	495.071383877826	460.707880150302	425.432548168145	381.836782665449
FBgn0039066	347.739600814169	0.255156789342735	0.160694730823782	1.58783544447726	0.112323554250958	1	223.347505211082	201.732500160002	214.946959386731	260.797192067462	261.804645026551	241.041508821257
FBgn0031419	34.254483656161	0.61073146258107	0.384901224768209	1.58672257524994	0.112575491047049	1	10.4694143067695	11.3973163932204	12.4807911901973	18.2659511953864	16.9688195850542	16.8954328613031
FBgn0042105	78.9616723475297	0.562033590790928	0.354280315986204	1.58640930763089	0.112646490398922	1	12.7959508193849	25.074096065085	13.8675457668859	17.2511761289761	25.4532293775813	34.9172279133597
FBgn0261064	156.610072625788	0.284977749237096	0.17971744740181	1.58569884759127	0.11280764072215	1	82.5920461978481	95.7374577030517	63.7907105276751	109.595707172319	98.1767418849566	88.9826130695295
FBgn0265977	13.6354249040467	-0.844308335691764	0.53271177745968	-1.58492522864424	0.11298332367949	1	8.14287779415404	7.97812147525431	16.6410549202631	5.07387533205179	8.48440979252711	4.50544876301415
FBgn0031741	240.506629578774	-0.300245396773564	0.189508546172587	-1.5843369749675	0.113117055851383	1	141.918727269542	82.0606780311872	92.9125566381354	70.0194795823146	93.3285077177982	95.7407862140507
FBgn0015569	419.75452600844	0.248921670904096	0.157150653378574	1.58396841217355	0.113200907561158	1	383.878524581548	439.936412778309	341.141625865393	438.382828689274	496.944002133731	451.671238492169
FBgn0000448	14.4565487015575	0.647324758392745	0.40873759654196	1.5837171913455	0.113258090866225	1	37.2245842018471	29.6330226223731	30.5086006871489	56.82740371898	46.0582245880043	49.5599363931557
FBgn0035445	46.6883225757373	-0.388042727090556	0.245143944039901	-1.5829178591799	0.11344018760555	1	68.6328271221555	83.2004096705092	90.1390474847583	74.0785798479561	52.1185172969523	57.4444717284304
FBgn0035667	140.764091904924	2.30382173540702	1.45610806845593	1.58217771422008	0.113609006412538	1	0	0	0	1.01477506641036	2.42411708357917	0
FBgn0035085	40.9022195640778	0.853919154530537	0.540109764762527	1.58101039870291	0.113875660113031	1	2.32653651261544	5.69865819661022	8.32052746013153	13.1920758633346	8.48440979252711	6.75817314452123
FBgn0037652	397.559109847721	-0.234607044664841	0.148408405314799	-1.58082046746072	0.113919093306263	1	209.38828613539	153.863771308476	206.6264319266	159.319685426426	143.022907931171	180.217950520566
FBgn0003479	183.732906611556	-0.345603216066861	0.219062035193719	-1.57764998285184	0.114646042836777	1	55.8368763027706	86.6196045884753	88.7522929080697	57.8421787853904	56.9667514641106	66.4553692544587
FBgn0037134	161.563929183916	-0.260219939460747	0.164988187161618	-1.57720345885031	0.114748717387446	1	108.183947836618	136.767796718645	108.16685698171	113.65480743796	87.2682150088503	93.4880618325436
FBgn0033960	56.8825001478422	-0.360484800105047	0.228560852282902	-1.5771939792159	0.114750897936052	1	115.163557374464	134.488333440001	123.421157325284	89.3002058441114	94.5405662595878	107.004408121586
FBgn0035064	129.805506801464	-0.29734368174265	0.188653883806093	-1.57613337050762	0.114995069917879	1	90.7349239920022	76.3620198345769	92.9125566381354	76.1081299807768	70.2993954237961	64.2026448729516
FBgn0035336	114.175612399096	0.377564724988176	0.239696801439397	1.57517631741797	0.115215752077658	1	65.1430223532323	47.8687288515258	54.083428490855	62.9160541174421	65.4511612566377	88.9826130695295
FBgn0262619	262.28403461645	0.504791098562145	0.320619084274522	1.57442623761576	0.115388941990421	1	12.7959508193849	19.3754378684747	11.0940366135087	21.3102763946175	25.4532293775813	15.7690706705495
FBgn0260746	382.155899132404	0.265794382511921	0.168859141222505	1.5740597789828	0.115473629978597	1	615.368907586784	519.717627530852	622.652804933176	581.466113053135	787.838052163232	744.525408088088
FBgn0030775	188.401418222799	-1.55779180786672	0.989766266828507	-1.57389866686236	0.115510878188027	1	1.16326825630772	0	9.70728203682012	2.02955013282071	1.21205854178959	0
FBgn0259748	159.325258568751	2.2996523534664	1.4625074687773	1.57240383557766	0.115856925318657	1	0	0	0	2.02955013282071	0	1.12636219075354
FBgn0010607	179.98841861629	-0.334703158124952	0.212985133856685	-1.57148600967694	0.116069801566559	1	82.5920461978481	107.134774096272	90.1390474847583	78.1376801135975	76.359688132744	67.5817314452123
FBgn0003741	67.714025182107	0.307786311254578	0.196011097044986	1.57024941901089	0.116357096537679	1	58.163412815386	54.7071186874581	63.7907105276751	70.0194795823146	66.6632197984273	81.0980777342547
FBgn0010638	565.172560408456	0.230021534548518	0.146532321674769	1.56976653286812	0.116469436206146	1	479.266521598781	465.010508843394	533.900512025107	641.337841971346	568.455456099317	521.505694318888
FBgn0040290	431.290858553008	0.450233112622582	0.28684772699861	1.56958926373073	0.116510697853169	1	32.5715111766162	23.9343644257629	22.1880732270174	33.4875771915418	42.4220489626356	32.6645035318526
FBgn0261119	398.388579260712	0.217888716867852	0.138822929418288	1.56954415081769	0.116521200290415	1	205.898481366466	191.474915406103	166.410549202631	192.807262617968	216.958478980336	248.926044156532
FBgn0067102	173.704617251938	0.331646788757027	0.211366235088752	1.56906228952684	0.116633425612808	1	150.061605063696	155.003502947798	159.476776319188	186.718612219506	213.322303354967	184.72339928358
FBgn0050051	95.6457086670214	-0.370687278924829	0.236410585755255	-1.56798088266904	0.116885593946162	1	52.3470715338474	75.2222881952549	76.2715017178724	61.9012790510318	47.2702831297939	47.3072120116486
FBgn0030177	148.536938682571	0.332682754461667	0.212451594651802	1.56592260466164	0.117366737182412	1	68.6328271221555	54.7071186874581	83.2052746013153	76.1081299807768	107.873210219273	75.466266780487
FBgn0050295	149.115104470995	-0.228186380500125	0.14583829426463	-1.56465338305501	0.117664204563691	1	202.408676597543	205.151695077968	171.957567509385	168.452661024119	149.083200640119	177.965226139059
FBgn0035099	39.5130115992489	0.408806385631348	0.261311846177098	1.56443877922889	0.117714559672967	1	38.3878524581548	33.0522175403393	44.3761464540348	54.7978535861593	41.209990420846	56.3181095376769
FBgn0030638	305.392650816213	-0.210900670625221	0.134924496324751	-1.56310141130786	0.118028743742514	1	302.449746640007	321.404322288816	342.528380442081	267.900617532334	288.469932945922	278.211461116124
FBgn0012037	540.984774902417	-0.19682400240999	0.125925942960848	-1.56301392534488	0.118049319475439	1	317.572233972008	355.596271468478	338.368116712016	318.639370852852	281.197581695184	281.590547688384
FBgn0014342	49.8845703745883	0.398919357014203	0.255338468985381	1.56231592755827	0.118213581649245	1	80.2655096852327	55.8468503267801	69.3377288344294	78.1376801135975	81.2079222999024	111.5098568846
FBgn0027509	445.873759516207	-0.160550769998392	0.10276884690139	-1.56225135183666	0.11822878752743	1	330.368184791393	355.596271468478	317.566798061687	303.417744856697	301.802576905607	293.980531786673
FBgn0263607	195.842006306421	0.205110378012685	0.131356897860327	1.56147397931687	0.118411958658707	1	303.613014896315	280.373983273223	259.323105840766	287.181343794131	303.014635447397	384.089507046956
FBgn0036665	42.7991652534328	0.476971348673643	0.305574701245277	1.56089933731389	0.118547503703568	1	118.653362143387	98.0169209816958	54.083428490855	104.521831840267	139.386732305803	135.163462890425
FBgn0033258	125.049854218702	0.360020756195464	0.230911478797944	1.55912888380268	0.118965878568126	1	43.0409254833856	31.9124859010172	31.8953552638375	49.7239782541075	43.6341075044251	43.928125439388
FBgn0017430	190.220740130173	-0.264982106613862	0.170109155793903	-1.55771807447509	0.119300093971562	1	122.143166912311	137.907528357967	119.260893595219	114.66958250437	103.024976052115	97.9935105955578
FBgn0025680	1036.07053575668	-0.21623807879376	0.138850587283696	-1.55734363839562	0.119388919898497	1	1757.69833528097	1886.25586307798	1801.39419511848	1556.66495187349	1454.4702501475	1676.02693984126
FBgn0033216	11.8541678436666	2.29976165882233	1.47711258654889	1.55693051414277	0.119486983780396	1	0	0	0	2.02955013282071	1.21205854178959	0
FBgn0003008	136.986084131817	-0.267755116309735	0.172133351383564	-1.55550980770192	0.119824700586574	1	104.694143067695	123.091017046781	115.100629865153	110.610482238729	92.1164491760086	81.0980777342547
FBgn0031514	66.2558606403111	1.32548709633218	0.852495191267922	1.55483234381742	0.119986003876519	1	0	2.27946327864409	2.77350915337718	3.04432519923107	6.06029270894794	3.37908657226061
FBgn0013432	107.421420399572	-0.265569896186209	0.171247324320166	-1.55079734670597	0.120950256673448	1	112.837020861849	105.99504245695	120.647648171907	97.4184063753943	78.7838052163232	104.751683740079
FBgn0038720	310.170016819431	-0.16241323810437	0.104775827371949	-1.55010217698221	0.121116993631011	1	442.041937396934	427.399364745766	432.66742792684	387.644075368756	374.526089412983	400.984939908259
FBgn0052267	252.719704523642	0.237278925956076	0.153122496540683	1.54960199393714	0.121237074093657	1	140.755459013234	139.047259997289	159.476776319188	176.570861555402	166.052020225173	173.459777376045
FBgn0003248	875.373760766864	-0.189272954924491	0.122148592905087	-1.54953037462791	0.121254275578145	1	1689.06550815881	1831.54874439052	1865.18490564615	1605.37415506118	1553.85905057425	1563.39072076591
FBgn0037199	610.55599283454	-0.25309424329306	0.163381996065141	-1.54909506180932	0.121358869830867	1	433.89905960278	427.399364745766	521.419720834909	380.540649903884	402.403435874143	376.204971711682
FBgn0035767	243.12130437265	-0.265733627858753	0.1715683282623	-1.54885013189899	0.121417751079893	1	267.551698950776	272.395861797969	287.058197374538	242.531240872075	237.563474190759	207.250643098651
FBgn0000152	154.067238959238	-0.22612808644044	0.146024301838393	-1.54856474979555	0.12148638523369	1	124.469703424926	136.767796718645	135.901948515482	115.684357570781	123.629971262538	100.246234977065
FBgn0052850	519.920003335144	-0.201652855068426	0.130225042748805	-1.54849521115075	0.121503113815392	1	865.471582692944	904.946921621703	956.860657915126	851.39628071829	764.80893986923	753.536305614117
FBgn0032050	426.539646048872	0.289425248301524	0.187057528537383	1.54725260493155	0.121802345507159	1	175.653506702466	135.628065079323	109.553611558399	162.364010625657	168.476137308753	185.849761474334
FBgn0025820	133.309322656308	-0.322986671516704	0.20886881170721	-1.54636141641608	0.122017306957608	1	109.347216092926	94.5977260637297	122.034402748596	85.24110557847	103.024976052115	72.0871802082264
FBgn0035998	148.795865497254	-0.425383948500709	0.275159002094922	-1.54595686589226	0.122114985435297	1	47.6939985086165	56.9865819661022	84.5920291780039	45.6648779884661	38.7858733372668	55.1917473469233
FBgn0027932	1123.86868900962	0.236188946360431	0.152780599861612	1.54593545629727	0.122120156471355	1	751.471293574787	934.579944244076	765.488526332101	968.095413355481	941.769486970509	978.808743764824
FBgn0031865	157.743474653958	0.29799255569822	0.192880187667115	1.54496197511232	0.122355461186205	1	123.306435168618	133.348601800679	83.2052746013153	124.817333168474	144.234966472961	152.058895751728
FBgn0030877	218.057990471825	-0.379439490015991	0.245694976856984	-1.54435184174261	0.122503119920023	1	122.143166912311	120.811553768137	169.184058356008	113.65480743796	99.3888004267462	102.498959358572
FBgn0037855	154.067244214107	0.315020653983945	0.203998309163668	1.54423169130879	0.122532213999263	1	138.428922500619	132.208870161357	120.647648171907	189.762937418737	151.507317723698	145.300722607206
FBgn0041156	14.1829908786756	1.25990348715194	0.815879293222287	1.54422780136508	0.122533156028075	1	0	4.55892655728818	1.38675457668859	2.02955013282071	8.48440979252711	4.50544876301415
FBgn0002023	54.1063148604147	0.380739060297774	0.246561832555666	1.54419301783789	0.122541579816603	1	105.857411324003	88.8990678671194	101.233084098267	138.009409031809	111.509385844642	135.163462890425
FBgn0046763	130.683049012202	0.236921812044091	0.153451443544712	1.54395297021144	0.122599726293602	1	169.837165420927	189.195452127459	201.079413619845	213.102763946175	249.684059608655	197.113383381869
FBgn0025583	3141.64379032223	-0.312796465955739	0.202629340095169	-1.54368792697458	0.122663952468307	1	5356.85032029705	5001.14243334513	4924.36550182118	4614.18222696789	3940.40231935795	3748.53337082777
FBgn0263080	15.137115472867	2.30029913451006	1.49099348744355	1.54279623209766	0.12288022398563	1	0	0	0	1.01477506641036	0	2.25272438150707
FBgn0036116	846.775241958076	-0.141788551382005	0.091906385978865	-1.54274972159835	0.122891512801585	1	1209.79898656003	1381.35474685832	1429.74396856593	1211.64142929397	1231.45147845822	1199.57573315252
FBgn0035020	672.151641299831	-0.246086457442576	0.159527637069135	-1.54259451192103	0.122929190447744	1	873.614460487098	976.750014898992	1206.47648171907	902.135034038807	832.684218209447	840.266194302139
FBgn0266095	111.680774550389	-0.242237485051579	0.157118219397134	-1.54175299326233	0.123133628893814	1	214.041359160621	226.806596225087	206.6264319266	192.807262617968	169.688195850542	184.72339928358
FBgn0266572	537.927616763769	0.256519948570579	0.166386381829704	1.54171240308071	0.123143496576047	1	400.164280169856	393.207415566105	348.075398748836	398.80660109927	484.823416715835	482.083017642514
FBgn0037556	200.446056857517	0.305409463869712	0.19810345434714	1.54166652407049	0.123154650743217	1	225.674041723698	180.077599012883	214.946959386731	235.427815407203	289.681991487711	242.167871012011
FBgn0285892	320.976504000358	0.27440989209159	0.177996111561619	1.54166228511455	0.123155681363747	1	245.449602080929	197.173573602714	166.410549202631	243.546015938486	269.076996277288	226.398800341461
FBgn0031997	186.311205089794	-0.237063310809762	0.153773836370786	-1.54163618730396	0.123162026692349	1	140.755459013234	158.422697865764	152.543003435745	141.05373423104	105.449093135694	135.163462890425
FBgn0263584	65.1279948576797	0.485896139240653	0.315345852070535	1.54083567629096	0.123356784130109	1	177.980043215081	176.658404094917	105.393347828333	185.703837153095	215.746420438547	244.420595393518
FBgn0030403	434.149112791573	-0.208714456378121	0.135461393141133	-1.54076708897175	0.123373482011753	1	481.593058111396	479.827020154581	511.712438798089	425.19075282594	424.220489626356	424.638545914084
FBgn0051897	18.6865796219405	0.491189888455611	0.318819382672474	1.54065252977488	0.123401375882618	1	16.2857555883081	27.3535593437291	22.1880732270174	28.41370185949	37.5738147954772	27.0326925780849
FBgn0036811	61.0528919054445	-0.411712071054708	0.267410423639016	-1.53962611274453	0.123651516579881	1	31.4082429203084	44.4495339335597	45.7629010307234	34.5023522579521	31.5135220865293	24.7799681965778
FBgn0035227	539.59195135357	0.167563151583372	0.108862407565196	1.53921960143148	0.123750693869156	1	907.349239920022	857.078192770177	754.394489718592	862.558806448803	986.615653016724	984.440554718592
FBgn0000490	136.264563542552	0.255583868647312	0.166047863730283	1.53921804777004	0.12375107303777	1	285.000722795391	253.020423929494	256.549596687389	264.856292333103	322.40757211603	362.688625422639
FBgn0038672	143.044948172577	-0.242322605980456	0.157563866902613	-1.53793259040939	0.124065097721026	1	118.653362143387	123.091017046781	130.354930208727	95.3888562425736	106.661151677484	112.636219075354
FBgn0053516	128.043880847841	0.399252712365809	0.259655542177262	1.53762445822646	0.124140463711167	1	368.756037249547	274.675325076613	196.91914988978	346.038297645932	390.282850456247	373.952247330174
FBgn0034417	270.903995297217	0.223386474350561	0.145296949118606	1.53744779711934	0.124183689324701	1	374.572378531086	315.705664092206	352.235662478902	391.703175634398	390.282850456247	434.775805630865
FBgn0266421	165.341066597207	-0.589966526516851	0.383774902403475	-1.53727229900146	0.124226642003167	1	48.8572667649242	34.1919491796613	116.487384441841	52.7683034533386	41.209990420846	37.1699522948667
FBgn0015320	586.869014819293	-0.178648472663663	0.116216483503968	-1.53720425259265	0.124243299291264	1	325.715111766162	322.544053928138	371.650226552542	302.402969790286	296.954342738449	299.612342740441
FBgn0037942	202.923493630573	-0.233550717171657	0.152031388670364	-1.53620064392127	0.124489178145453	1	159.367751114158	172.099477537629	199.692659043157	142.06850929745	136.962615222223	171.207052994538
FBgn0260027	24.0088796283351	-0.516392695974186	0.336371238506807	-1.53518683186624	0.124737941955962	1	31.4082429203084	34.1919491796613	31.8953552638375	17.2511761289761	26.6652879193709	24.7799681965778
FBgn0260750	159.361947889635	0.288160015203974	0.188038885876225	1.53244906691083	0.125411657159981	1	100.041070042464	85.4798729491533	92.9125566381354	123.802558102064	94.5405662595878	120.520754410629
FBgn0031662	344.084422565834	0.199440804628766	0.1301763811487	1.53208134124535	0.125502363523348	1	259.408821156622	253.020423929494	266.256878724209	302.402969790286	298.166401280239	292.85416959592
FBgn0033904	24.6762960309994	0.470931932813157	0.307702845440607	1.5304763663749	0.125898859029032	1	27.9184381513853	28.4932909830511	23.574827803706	39.5762275900039	46.0582245880043	25.9063303873314
FBgn0030628	156.97601583578	-0.416045766934481	0.272047518170245	-1.52931285583029	0.126186904112574	1	33.7347794329239	44.4495339335597	66.5642196810523	44.6501029220557	30.3014635447397	31.538141341099
FBgn0033899	143.16136516126	-0.301070723101499	0.19695888172931	-1.52859683431426	0.126364421299794	1	104.694143067695	83.2004096705092	83.2052746013153	67.9899294494939	75.1476295909544	77.7189911619941
FBgn0259236	172.041293671187	0.250060800713196	0.163902586057619	1.52566720713784	0.127092765303938	1	291.980332333238	242.762839175595	266.256878724209	295.299544325414	335.740216075716	322.139586555512
FBgn0051922	31.3467111320369	0.486023320271481	0.318821436267052	1.52443739656319	0.127399484267861	1	19.7755603572312	22.7946327864409	24.9615823803946	37.5466774571832	31.5135220865293	24.7799681965778
FBgn0036196	384.334905858429	-0.192750250766295	0.126481802706794	-1.5239366188757	0.127524544803977	1	609.552566305245	503.761384580343	644.840878160194	506.372758138768	499.36811921731	530.516591844916
FBgn0033388	33.4509341255791	0.529283806958569	0.347332332327032	1.52385412383728	0.127545155666574	1	31.4082429203084	33.0522175403393	44.3761464540348	43.6353278556454	50.9064587551627	61.9499204914446
FBgn0028979	17.0559156782993	0.488874030403679	0.321257911438325	1.52174938887858	0.12807188726824	1	34.8980476892316	27.3535593437291	26.3483369570832	41.6057777228246	46.0582245880043	37.1699522948667
FBgn0052023	81.1393051321158	2.08218506973925	1.3685872408772	1.52141201346044	0.128156475998801	1	1.16326825630772	0	0	1.01477506641036	3.63617562536876	1.12636219075354
FBgn0260744	1080.70998274285	-0.186550535413498	0.122781118184279	-1.51937478801511	0.12866818438928	1	1475.02414899819	1428.08374407052	1374.27378549839	1315.14848606782	1109.03356573747	1333.61283385219
FBgn0032166	282.889960280948	0.198350649551064	0.130594484719701	1.51882868542872	0.128805623428218	1	211.714822648005	207.431158356612	162.250285472565	218.176639278227	241.199649816128	211.756091861665
FBgn0039015	13.7009791276811	-0.930281968279792	0.612614095000001	-1.51854483250143	0.128877106463886	1	9.30614605046176	4.55892655728818	9.70728203682012	5.07387533205179	4.84823416715835	2.25272438150707
FBgn0039067	165.394467017551	0.275602884881974	0.181544449257347	1.51810141268101	0.128988835107086	1	83.7553144541559	62.6852401627124	73.4979925644952	86.2558806448803	95.7526248013774	84.4771643065153
FBgn0004584	287.083398228128	0.289119273952253	0.190522114512594	1.51751031470492	0.129137891264489	1	53.5103397901551	72.9428249166108	76.2715017178724	71.034254648725	94.5405662595878	82.2244399250082
FBgn0038966	365.09618907538	-0.20330413545904	0.133983404013966	-1.51738296959412	0.129170021172215	1	533.940129645244	565.306893103734	535.287266601795	506.372758138768	490.883709424783	422.385821532577
FBgn0030955	188.096032973494	-0.47473589228485	0.313120925333883	-1.51614233950873	0.129483364323052	1	34.8980476892316	35.3316808189834	62.4039559509865	31.4580270587211	29.0894050029501	33.7908657226061
FBgn0011638	1200.18109814675	-0.190563288731324	0.125700751827466	-1.51600754936524	0.129517443484833	1	579.307591641245	515.158700973564	669.802460540588	491.151132142613	519.973114427733	532.769316226423
FBgn0036411	14.961354495589	1.03605965940101	0.684012068213655	1.51468037999206	0.129853365400528	1	3.48980476892316	3.41919491796613	2.77350915337718	6.08865039846214	4.84823416715835	9.0108975260283
FBgn0030719	40.8646568131967	0.597868710319153	0.394809691729016	1.51432126121542	0.129944378684577	1	46.5307302523088	21.6549011471188	20.8013186503288	47.6944281212868	44.8461660462147	42.8017632486344
FBgn0035989	400.439836263899	0.214535917918461	0.141967390737166	1.51116335099549	0.130746837317058	1	625.838321893553	561.887698185768	520.032966258221	647.426492369808	723.598949448384	612.741031769924
FBgn0265042	32.9181499900214	0.342363438096399	0.226688247277416	1.51028314086977	0.130971191725942	1	60.4899493280015	42.1700706549156	48.5364101841006	57.8421787853904	71.5114539655857	63.0762826821981
FBgn0000259	676.275911476362	0.176203188615169	0.116792465572369	1.50868626457746	0.131378977279414	1	504.858423237551	500.342189662377	438.214446233594	520.579609068513	546.638402347104	566.560181949029
FBgn0022724	91.2718068748297	-0.399033471220712	0.264587112404562	-1.50813646059441	0.131519605273537	1	32.5715111766162	41.0303390155936	36.0556189939033	27.3989267930796	19.3929366686334	36.0435901041132
FBgn0025574	897.326448713588	0.214154669635441	0.142162882506325	1.50640354120502	0.131963612195474	1	1305.18698357726	1184.1811732556	1019.26461386611	1319.20758633346	1413.26025972666	1340.37100699671
FBgn0046876	120.91755949453	0.227690988619953	0.151215607101693	1.50573735730089	0.132134609934868	1	180.306579727697	191.474915406103	183.051604122894	194.836812750789	218.170537522126	237.662422248996
FBgn0028360	529.979622456146	-0.314533229644676	0.208996589316656	-1.50496824217604	0.132332241757537	1	637.471004456631	517.438164252208	450.695237423791	454.61922975184	469.06665567257	368.320436376407
FBgn0038207	16.9182547337393	0.609635420151911	0.405083159846179	1.50496362372459	0.132333429206032	1	17.4490238446158	18.2357062291527	11.0940366135087	24.3546015938486	20.604995210423	27.0326925780849
FBgn0010246	788.008635479155	0.279380845892398	0.185648944578288	1.50488787602335	0.132352905849728	1	262.898625925545	271.256130158646	298.152233988047	296.314319391824	306.650811072766	406.616750862027
FBgn0035121	2312.26771164274	0.246059470485816	0.163581864821032	1.5041977346023	0.132530460895978	1	1983.37237700466	1577.38858882171	1353.47246684806	1891.54072378891	1995.04835978566	1944.10114124061
FBgn0262146	108.73938040591	-0.53690969314364	0.357351462664103	-1.50246955515701	0.132975884865845	1	24.4286333824621	17.0959745898307	31.8953552638375	18.2659511953864	18.1808781268438	13.5163462890425
FBgn0031637	1198.6357420842	-0.120851696560684	0.0804401719023783	-1.50237988933377	0.132999027077849	1	1509.92219668742	1521.54173849493	1537.91082554764	1410.5373423104	1401.13967430876	1389.93094338987
FBgn0034312	192.963545675575	-0.389909968101179	0.259557082275048	-1.50221278758249	0.133042163358458	1	204.735213110159	160.702161144408	285.671442797849	156.275360227195	185.444956893807	154.311620133235
FBgn0035528	480.739908402037	-0.250079539712868	0.166507284894433	-1.50191350409336	0.133119448603128	1	423.42964529601	395.486878844749	550.54156694537	361.259923642087	383.01049920551	405.490388671273
FBgn0085279	87.6661404796713	-0.318055938877403	0.211902509906703	-1.50095408977194	0.133367436511548	1	76.7757049163095	69.5236299986447	91.5258020614469	66.9751543830836	60.6029270894794	61.9499204914446
FBgn0037265	171.689011802298	0.257943276684609	0.171945087796259	1.50014914639638	0.133575772693824	1	189.612725778158	180.077599012883	171.957567509385	237.457365540024	208.474069187809	201.618832144883
FBgn0027493	1939.60387171428	-0.202310758715877	0.135065470186719	-1.49787179829305	0.1341665621189	1	1697.20838595296	1626.39704931256	1776.43261273808	1502.88187335374	1505.37670890267	1423.72180911247
FBgn0027094	1411.18122120608	0.142039557855721	0.0948671087253296	1.49724767376405	0.134328824717228	1	977.145335298485	854.798729491533	844.53353720335	1065.51381973087	936.921252803351	950.649688995986
FBgn0051460	73.3320869758822	0.442494960361696	0.295725460938271	1.49630322312376	0.134574655579409	1	22.1020968698467	26.213827704407	36.0556189939033	37.5466774571832	38.7858733372668	37.1699522948667
FBgn0038499	263.705138295114	0.245904308783033	0.164384104869579	1.49591293500142	0.134676345094846	1	283.837454539084	266.697203601358	230.201259730306	270.944942731565	329.679923366768	327.771397509279
FBgn0051100	92.8723813591013	0.319245441993151	0.213608195280697	1.49453742434197	0.135035207809765	1	176.816774958773	177.798135734239	145.609230552302	205.999338481302	210.898186271388	208.377005289404
FBgn0030311	432.980639408557	-0.193038302330318	0.129205832775643	-1.49403705841606	0.135165933500367	1	429.245986577549	419.421243270512	424.346900466708	366.333798974139	375.738147954772	371.699522948667
FBgn0030331	72.6179568760458	0.428196377018495	0.286619263891361	1.49395533016509	0.135187295124866	1	22.1020968698467	31.9124859010172	38.8291281472805	39.5762275900039	50.9064587551627	33.7908657226061
FBgn0033451	273.928321077744	0.210322332124518	0.140878284281492	1.49293649619035	0.135453810635492	1	233.816919517852	242.762839175595	210.786695656665	269.930167665155	263.01670356834	263.568752636328
FBgn0052446	590.361662027559	-0.181350113509885	0.121492830908992	-1.49268160230566	0.13552055144096	1	608.389298048938	616.594816873226	718.338870724689	555.081961326465	556.334870681421	600.351047671635
FBgn0025874	108.46026739312	0.320325874287313	0.214643064809827	1.4923653581406	0.135603391361094	1	55.8368763027706	50.1481921301699	56.8569376442321	72.0490297151353	56.9667514641106	73.2135423989799
FBgn0039508	572.606092844846	-0.287892385577024	0.192915454487296	-1.49232411857383	0.135614196916511	1	468.797107292011	455.892655728818	744.687207681772	458.678330017481	472.702831297939	433.649443440112
FBgn0026666	229.415856943712	-0.250179359864183	0.167717240401258	-1.49167348130483	0.135784764355637	1	209.38828613539	248.461497372206	220.493977693486	225.280064743099	185.444956893807	158.817068896249
FBgn0031568	42.30762564423	0.391578786836898	0.262523674676725	1.49159418600662	0.135805563289659	1	102.367606555079	90.0387995064415	74.8847471411838	116.699132637191	119.993795637169	114.888943456861
FBgn0027578	793.186705053804	0.239844665763258	0.160913707812955	1.49051730286429	0.136088270355436	1	1401.7382488508	1579.66805210035	1241.14534613629	1608.41848026042	1585.37257266078	1794.29496987039
FBgn0036145	341.947077651633	-0.249065705183682	0.167218953681204	-1.48945857930983	0.136366652819894	1	457.164424728934	569.865819661022	612.945522896356	497.239782541075	449.673719003937	431.396719058605
FBgn0032025	378.34729252673	-0.214968586999595	0.144329966055444	-1.48942449634482	0.136375621946471	1	585.123932922783	612.035890315938	594.917713399405	560.155836658517	470.27871421436	512.49479679286
FBgn0025519	194.100567963405	0.22739311068683	0.152709950428645	1.48905235086879	0.136473583780647	1	132.61258121908	123.091017046781	135.901948515482	157.290135293605	152.719376265488	147.553446988713
FBgn0024244	73.1981537216219	0.336175716980308	0.225890772307427	1.48822244284856	0.136692240478082	1	43.0409254833856	53.5673870481361	49.9231647607892	57.8421787853904	66.6632197984273	60.823558300691
FBgn0035203	316.211488547861	-0.301816906820457	0.202847400345107	-1.4879012809973	0.136776929823835	1	153.551409832619	164.121356062374	169.184058356008	139.024184098219	121.205854178959	134.037100699671
FBgn0033791	43.0479352261797	0.384929410366747	0.258860899840302	1.48701256390679	0.137011492678907	1	104.694143067695	104.855310817628	76.2715017178724	109.595707172319	135.750556680434	129.531651936657
FBgn0000079	2682.91167810939	-0.203935550279949	0.137202453733827	-1.48638413330118	0.137177544229623	1	1105.10484349233	1057.67096129086	1144.07252576809	927.504410699066	887.226852589978	1055.40137273606
FBgn0051233	268.024582586807	-1.1298399394506	0.760447821308799	-1.48575603452456	0.137343663156991	1	8.14287779415404	2.27946327864409	4.16026373006577	1.01477506641036	3.63617562536876	2.25272438150707
FBgn0051957	85.6010317637042	-0.412134103635288	0.277421886047379	-1.48558612122226	0.137388628304663	1	40.7143889707702	33.0522175403393	37.4423735705919	25.3693766602589	29.0894050029501	29.285416959592
FBgn0010113	729.220284807102	0.354008355189004	0.238367063929362	1.48513955474113	0.137506859922108	1	1319.14620265295	1155.68788227255	883.362665350631	1311.08938580218	1598.70521662047	1384.2991324361
FBgn0032509	510.007063418894	-0.219463585051047	0.147817169905801	-1.48469616344911	0.137624328490058	1	403.654084938779	398.906073762715	409.092600123134	344.008747513111	339.376391701084	357.056814468871
FBgn0046113	24.400858039186	-0.541227733387246	0.364817539954439	-1.48355732417591	0.13792639809108	1	46.5307302523088	42.1700706549156	37.4423735705919	23.3398265274382	23.0291122940022	40.5490388671274
FBgn0004638	908.453085419823	0.134892942917804	0.0909505929428132	1.48314528309475	0.13803581507968	1	1073.69660057203	1134.03298112543	1002.62355894585	1200.47890356345	1138.12297074042	1188.31211124498
FBgn0033569	349.109609414479	-0.284494246241535	0.191833523752631	-1.48302674462879	0.138067305207713	1	104.694143067695	92.3182627850856	99.8463295215784	83.2115554456493	88.4802735506399	72.0871802082264
FBgn0038951	72.3942761219105	-0.312386661885194	0.210721773214402	-1.4824602940644	0.138217861086512	1	63.9797540969246	46.7289972122038	61.0172013742979	46.6796530548764	43.6341075044251	47.3072120116486
FBgn0038868	189.338827233918	0.205905608134884	0.138957665541799	1.48178660984303	0.138397083074423	1	190.775994034466	191.474915406103	169.184058356008	195.851587817199	221.806713147494	220.766989387693
FBgn0052581	170.252962819	-0.257282319761916	0.17366023338998	-1.48152697217762	0.138466202947762	1	252.429211618775	254.160155568816	245.45556007388	230.353940075151	202.413776478861	195.987021191116
FBgn0037307	11.1902067325076	1.17899632835468	0.796566739864565	1.4800973595196	0.138847266144362	1	3.48980476892316	1.13973163932204	2.77350915337718	6.08865039846214	3.63617562536876	6.75817314452123
FBgn0020764	691.856846337047	-0.212669775024088	0.143900121840043	-1.47789850560716	0.139434946389398	1	716.573245885556	721.450127690854	800.157390749316	617.998015443907	662.996022358904	649.910984064791
FBgn0004240	5041.1582686437	1.23078381540735	0.83287985493543	1.4777447288634	0.139476117306726	1	553.715690002475	1046.27364489764	3504.32881529206	1742.36878902658	5971.8124353973	4264.40725419289
FBgn0036549	358.437109498613	0.28360961923436	0.191954705000789	1.47748198843677	0.139546482913649	1	453.674619960011	420.560974909834	643.454123583505	499.269332673896	621.786031938058	724.250888654525
FBgn0037045	97.37403567362	0.291146333149174	0.197109969546365	1.47707563356246	0.139655364308074	1	66.3062906095401	59.2660452447463	56.8569376442321	56.82740371898	94.5405662595878	74.3399045897335
FBgn0010590	924.653157123782	-0.254058999943168	0.172002116964955	-1.47706902930114	0.139657134437039	1	517.654374056935	507.18057949831	622.652804933176	473.899956013637	489.671650882993	416.754010578809
FBgn0038419	61.4313277742667	-0.395211681589326	0.267597156734301	-1.47689043640226	0.13970500893644	1	36.0613159455393	30.7727542616952	27.7350915337718	23.3398265274382	25.4532293775813	23.6536060058243
FBgn0062449	242.250234863291	0.193623622977861	0.131188678615286	1.47591716771282	0.13996613016846	1	203.571944853851	197.173573602714	196.91914988978	256.73809180182	218.170537522126	207.250643098651
FBgn0027057	453.76252786656	-0.159090349219598	0.107848220665273	-1.4751318866295	0.140177089228009	1	352.470281661239	378.390904254919	367.489962822476	323.713246184904	313.923162323503	345.793192561336
FBgn0036691	140.291060936726	0.332936192409976	0.225700918835643	1.47512112102841	0.140179983013528	1	52.3470715338474	71.8030932772888	77.658256294561	81.1820053128286	98.1767418849566	74.3399045897335
FBgn0052196	66.4242002386767	-0.346461994862921	0.23496801627439	-1.47450704294294	0.140345122827532	1	61.6532175843092	71.8030932772888	94.299311214824	57.8421787853904	60.6029270894794	59.6971961099375
FBgn0053868	48.6221450486467	0.61086905712541	0.414376124040903	1.47418980410443	0.140430494294907	1	9.30614605046176	11.3973163932204	9.70728203682012	18.2659511953864	13.3326439596855	14.642708479796
FBgn0003651	542.283601126367	0.223969416187054	0.152142353203593	1.47210432513387	0.140992707728207	1	1078.34967359726	1043.99418161899	938.832848418175	1057.39561919959	1334.47645451034	1186.05938686348
FBgn0036821	959.494977464611	0.208197437612387	0.141522569742329	1.47112533351714	0.141257225032114	1	2035.71944853851	1921.58754389697	1646.07768252935	2162.48566652047	2267.76153168832	2045.47373840842
FBgn0033730	27.3845661149381	0.365939330509327	0.248851033727254	1.47051561341073	0.141422160161724	1	75.6124366600018	49.0084604908479	54.083428490855	67.9899294494939	75.1476295909544	87.8562508787759
FBgn0027329	2138.62928305465	-0.143189562614202	0.0974065851589598	-1.47001932549559	0.141556520015414	1	872.45119223079	772.738051460346	895.843456540828	771.229050471871	790.262169246811	737.767234943567
FBgn0010406	577.053499545171	-0.19005839885349	0.129376167540152	-1.46903716864627	0.141822708082862	1	529.287056620013	539.093065399327	615.719032049733	512.46140853723	471.49077275615	489.967552977789
FBgn0052791	108.712431695142	0.301821930877259	0.205750180585607	1.46693397798346	0.142394016313446	1	183.79638449662	178.937867373561	124.807911901973	205.999338481302	197.565542311703	199.366107763376
FBgn0004595	2183.44496329009	0.321546475322653	0.219266596841202	1.46646356515272	0.142522040177843	1	6627.13925618508	6221.79501905904	3455.79240510796	6681.27903724579	7389.92092929111	6307.62826821981
FBgn0031695	58.6774681964115	-0.419056461641866	0.285768252976275	-1.46642063027434	0.142533729396632	1	62.8164858406169	87.7593362277974	84.5920291780039	60.8865039846214	63.0270441730585	51.8126607746627
FBgn0037121	162.64887245225	0.250854592616928	0.171135065453665	1.46582812792885	0.142695116064327	1	74.4491684036941	72.9428249166108	99.8463295215784	92.3445310433425	103.024976052115	96.8671484048042
FBgn0026080	234.457591359783	-0.211019445063891	0.143984909873448	-1.46556639337665	0.142766452359837	1	138.428922500619	175.518672455595	169.184058356008	140.038959164629	139.386732305803	137.416187271932
FBgn0052645	69.628526880092	0.409646951743179	0.279676586400152	1.46471664652353	0.142998241326298	1	74.4491684036941	85.4798729491533	54.083428490855	100.462731574625	79.9958637581128	104.751683740079
FBgn0039611	335.742376906521	0.241750159415477	0.165176601242569	1.46358598976411	0.14330710287467	1	673.53232040217	646.227839495599	582.436922209207	747.889223944433	694.509544445434	807.601690770286
FBgn0015576	606.707363028502	0.181316754959256	0.124128266669737	1.46072091251928	0.144092047574742	1	1115.5742577991	1112.37807997831	1048.38645997657	1149.74015024293	1191.45354657916	1375.28823491007
FBgn0035641	285.684603639584	-2.02555014117184	1.3871447940662	-1.46022978267053	0.144226932645599	1	3.48980476892316	1.13973163932204	0	1.01477506641036	0	0
FBgn0042175	102.739407082508	-0.37085158850898	0.254126685687834	-1.45931777099761	0.144477666424902	1	148.898336807388	100.29638426034	119.260893595219	91.3297559769321	95.7526248013774	97.9935105955578
FBgn0052412	400.808418591427	0.252678385965517	0.173150479271933	1.45929937374696	0.144482727703429	1	109.347216092926	86.6196045884753	110.940366135087	121.773007969243	117.56967855359	125.026203173643
FBgn0030583	13.1890477866884	-1.30213573334117	0.892588694843031	-1.45883063595172	0.144611728277387	1	5.8163412815386	2.27946327864409	2.77350915337718	0	0	4.50544876301415
FBgn0032144	593.587165204747	-2.02642387150274	1.38926425077996	-1.45863097705499	0.14466670287739	1	2.32653651261544	1.13973163932204	1.38675457668859	0	1.21205854178959	0
FBgn0038446	88.9046927421219	-0.355790899398356	0.243969490097228	-1.4583417756727	0.144746360733647	1	48.8572667649242	69.5236299986447	76.2715017178724	64.9456042502628	48.4823416715835	37.1699522948667
FBgn0035228	1123.95258192544	-0.0916963842797574	0.0628826900396848	-1.45821344827787	0.144781718095326	1	1527.37122053204	1494.1881791512	1447.77177806289	1383.13841551732	1444.77378181319	1369.6564239563
FBgn0030598	23.4460196873931	-2.02623852819858	1.38961164233537	-1.45813295345835	0.144803899780017	1	1.16326825630772	2.27946327864409	1.38675457668859	0	1.21205854178959	0
FBgn0031942	47.857843096353	0.332517112767342	0.228092169763596	1.45781906109261	0.144890422909922	1	77.9389731726173	72.9428249166108	101.233084098267	96.4036313089839	94.5405662595878	125.026203173643
FBgn0034182	74.1176380183474	-0.277399129763377	0.190327177082126	-1.45748565189762	0.144982369145078	1	120.979898656003	121.951285407459	115.100629865153	99.447956508215	98.1767418849566	97.9935105955578
FBgn0035760	78.4444287385301	0.413958952192611	0.284131168950076	1.45692904344946	0.145135967953334	1	17.4490238446158	28.4932909830511	23.574827803706	23.3398265274382	38.7858733372668	31.538141341099
FBgn0033564	234.335345604547	0.1566644810989	0.107539557283112	1.45680794171822	0.145169403068237	1	248.939406849852	247.321765732884	252.389332957323	281.092693395669	259.380527942972	292.85416959592
FBgn0036208	298.946165018695	0.233111820731281	0.160110777100239	1.45594084891199	0.14540897207572	1	535.103397901551	517.438164252208	490.91112014776	533.771684931848	568.455456099317	712.987266746989
FBgn0024330	150.092134497533	0.220497379101457	0.151455191563698	1.455858837356	0.145431646704739	1	97.7145335298485	95.7374577030517	83.2052746013153	106.551381973087	115.145561470011	102.498959358572
FBgn0038312	83.9252264653952	0.335274613008332	0.230326246939363	1.4556509189185	0.145489144315341	1	51.1838032775397	56.9865819661022	47.149655607412	70.0194795823146	67.8752783402169	58.5708339191839
FBgn0051028	25.393545886804	0.425969960442871	0.292789302296151	1.45486859356634	0.145705643959139	1	36.0613159455393	31.9124859010172	49.9231647607892	60.8865039846214	48.4823416715835	47.3072120116486
FBgn0030291	96.6319822088958	-0.441745338675842	0.303682914487842	-1.45462690721617	0.145772577751243	1	27.9184381513853	28.4932909830511	44.3761464540348	25.3693766602589	24.2411708357917	23.6536060058243
FBgn0036039	136.835879784733	0.255362917760087	0.175657167438738	1.45375746110187	0.146013561039294	1	132.61258121908	99.1566526210178	119.260893595219	138.009409031809	150.295259181909	130.65801412741
FBgn0030484	971.181363278754	-0.200858107206814	0.138177129466427	-1.45362773117686	0.146049544246231	1	1015.53318775664	803.510805722041	929.125566381354	797.613202198541	747.840120284175	844.771643065153
FBgn0053169	69.0294805987551	-0.358798299465241	0.247015467253625	-1.45253373586052	0.146353255854903	1	38.3878524581548	60.4057768840683	58.2436922209207	45.6648779884661	41.209990420846	34.9172279133597
FBgn0040608	9.58271384983857	1.457572133247	1.0039151705298	1.45188774513468	0.146532820592247	1	3.48980476892316	0	0	2.02955013282071	3.63617562536876	4.50544876301415
FBgn0263336	113.000597981792	0.293137992953796	0.201921519947307	1.45174220672612	0.146573298863354	1	217.531163929544	192.614647045425	155.316512589122	190.777712485147	197.565542311703	306.370515884962
FBgn0029925	290.759478691107	-0.273406541460081	0.188502471835872	-1.45041356114489	0.146943227664733	1	243.123065568314	227.946327864409	299.538988564735	228.32438994233	203.625835020651	203.87155652639
FBgn0051457	160.037798297875	-0.282196211688799	0.19460265495253	-1.45011491111278	0.147026477645751	1	58.163412815386	76.3620198345769	63.7907105276751	53.7830785197489	53.3305758387418	56.3181095376769
FBgn0033653	202.243090196714	0.203582748597567	0.140418563994257	1.44982787750125	0.147106523484203	1	111.673752605541	134.488333440001	119.260893595219	142.06850929745	141.810849389382	137.416187271932
FBgn0038252	905.667372398054	-1.71762782136486	1.18494587552446	-1.44954116204222	0.147186513861186	1	2.32653651261544	4.55892655728818	0	1.01477506641036	1.21205854178959	0
FBgn0033249	114.796490936115	-0.193840119394448	0.133891599212956	-1.44773921989043	0.147689996852139	1	254.755748131391	250.74096065085	216.33371396342	207.014113547713	204.83789356244	220.766989387693
FBgn0035290	844.272113029878	0.340542240912782	0.235435499897171	1.44643539764189	0.148055119495364	1	1992.67852305512	1762.02511439188	1363.17974888488	2260.91884796228	1945.35395957229	2275.25162532215
FBgn0051259	16.4110690135072	-2.0254283125846	1.40104869871683	-1.4456516139943	0.148274942079987	1	0	3.41919491796613	1.38675457668859	0	0	1.12636219075354
FBgn0035211	114.777543178417	0.273190355137204	0.189061470262251	1.44498164939824	0.14846304014591	1	68.6328271221555	69.5236299986447	91.5258020614469	92.3445310433425	89.6923320924295	93.4880618325436
FBgn0003733	398.719957003591	-1.71737732251165	1.18897918533225	-1.44441327795973	0.148622757933012	1	3.48980476892316	2.27946327864409	1.38675457668859	0	1.21205854178959	1.12636219075354
FBgn0051865	8.36779374716819	-1.54536869169969	1.07043321255003	-1.44368529823383	0.148827518779754	1	2.32653651261544	5.69865819661022	12.4807911901973	0	6.06029270894794	1.12636219075354
FBgn0050466	57.6650110258234	-0.303839078285017	0.210637345663993	-1.44247487228451	0.149168455281507	1	80.2655096852327	93.4579944244076	73.4979925644952	65.9603793166732	56.9667514641106	77.7189911619941
FBgn0054056	40.4204979598732	-0.42861114486534	0.297142021856193	-1.44244540771407	0.149176761891305	1	75.6124366600018	66.1044350806785	85.9787837546925	60.8865039846214	59.3908685476898	48.4335742024021
FBgn0004597	205.791077076625	-0.252547549034582	0.175085213777726	-1.44242648242812	0.149182097467215	1	120.979898656003	107.134774096272	145.609230552302	91.3297559769321	106.661151677484	114.888943456861
FBgn0035023	221.702224376605	0.207831058541992	0.144132139438299	1.44194805788589	0.149317027328655	1	366.429500736932	428.539096385088	420.186636736642	457.663554951071	467.854597130781	477.5775688795
FBgn0036020	223.653479763815	-0.216371631928888	0.150183596899263	-1.44071414186478	0.149665457971412	1	157.041214601542	157.282966226442	141.448966822236	123.802558102064	139.386732305803	130.65801412741
FBgn0035006	22.7429178586687	-2.02562812529739	1.40620780878771	-1.44048988537738	0.14972884961186	1	1.16326825630772	2.27946327864409	1.38675457668859	1.01477506641036	0	0
FBgn0033951	122.630697399813	0.275671534552206	0.191402623705769	1.44027040598973	0.14979091071844	1	74.4491684036941	69.5236299986447	63.7907105276751	88.2854307777011	86.0561564670607	77.7189911619941
FBgn0034331	2666.84591610281	-0.286946578585518	0.199446274288964	-1.43871616358088	0.150230957835676	1	4273.84757367456	4476.86587925699	4584.61063053247	4012.42061258655	3214.37925282599	3702.35252100688
FBgn0037234	486.865662626894	0.141982681616051	0.0987068032482686	1.43842852714958	0.150312503302998	1	516.491105800628	506.040847858987	427.120409620085	535.801235064669	544.214285263525	523.758418700395
FBgn0035540	244.999106648784	-0.171794062543119	0.119439022456961	-1.43834116362618	0.150337277706645	1	267.551698950776	279.234251633901	244.068805497192	226.29483980951	246.047883983286	232.030611295229
FBgn0031929	98.0232281159661	1.67317661492804	1.16432096749586	1.43704069722852	0.150706430031508	1	0	1.13973163932204	1.38675457668859	2.02955013282071	3.63617562536876	2.25272438150707
FBgn0039714	1439.26550289111	-0.369001859918829	0.25685969678666	-1.43658917508305	0.150834761241034	1	979.4718718111	956.234845391195	1572.57968996486	980.272714152405	975.707126140618	759.168116567884
FBgn0032298	241.837952622694	0.217189078082842	0.151253356638135	1.43592897976112	0.151022551243708	1	118.653362143387	153.863771308476	151.156248859056	154.245810094374	183.020839810228	155.437982323988
FBgn0035480	66.1839020041864	0.285086191763245	0.198670487575567	1.43497001110851	0.151295643438434	1	90.7349239920022	109.414237374916	88.7522929080697	128.876433434115	119.993795637169	103.625321549325
FBgn0030246	441.898329087935	-0.308436674967795	0.215033654756697	-1.43436465941473	0.151468227267364	1	456.001156472626	396.626610484071	650.387896466948	411.998676962605	418.160196917408	381.836782665449
FBgn0283480	175.399031203143	-2.02137064441347	1.40930434596536	-1.43430384657535	0.151485573098786	1	2.32653651261544	2.27946327864409	0	0	0	1.12636219075354
FBgn0259704	185.775645154416	-0.258407731399049	0.180188512476781	-1.43409659054901	0.151544700732284	1	87.245119223079	93.4579944244076	83.2052746013153	77.1229050471871	73.9355710491648	69.8344558267193
FBgn0003321	697.546863921101	0.133622092409928	0.0931843412090726	1.43395436053067	0.151585287403214	1	845.696022335713	847.960339655601	741.913698528395	858.499706183162	905.407730716822	912.353374510365
FBgn0003015	475.74857529634	-2.02178040671618	1.41001254387841	-1.43387405700309	0.151608206425166	1	3.48980476892316	1.13973163932204	0	0	1.21205854178959	0
FBgn0032408	169.506784787717	0.304890307818485	0.21295961233352	1.43168136191473	0.152235032792429	1	73.2859001473864	62.6852401627124	44.3761464540348	74.0785798479561	78.7838052163232	72.0871802082264
FBgn0033301	124.040054524418	-1.03477807874857	0.723199672685401	-1.43083316797726	0.152478034703802	1	3.48980476892316	3.41919491796613	9.70728203682012	2.02955013282071	4.84823416715835	1.12636219075354
FBgn0028424	414.970807376645	-0.29542351352524	0.206494931297911	-1.43065745811954	0.152528411298298	1	424.592913552318	495.783263105089	590.757449669339	408.954351763374	418.160196917408	403.237664289766
FBgn0031752	704.001129245742	-0.153518571048604	0.107373159269067	-1.42976673214859	0.152783980236813	1	963.186116222792	1008.66250080001	894.45670196414	863.573581515214	814.503340082603	899.963390412076
FBgn0003250	3637.79094925634	-0.222424700350423	0.155587484610708	-1.42957964072076	0.152837702277323	1	5891.9537181986	6213.81689758378	6818.67225357779	5403.67722863515	5329.42140824882	5486.51023116048
FBgn0259209	652.674212544612	-0.251971283550284	0.17629740746735	-1.42923986898076	0.152935302186997	1	807.308169877558	796.672415886109	1045.6129508232	848.351955519058	665.420139442483	708.481817983975
FBgn0037933	386.681154611339	-0.193919606638195	0.135700376853534	-1.42902776790001	0.152996252553609	1	296.633405358469	371.552514418986	336.981362135327	288.196118860541	272.713171902657	317.634137792498
FBgn0033624	781.043846497409	-0.191083801391906	0.133850407326158	-1.4275922293332	0.153409261550206	1	752.634561831095	755.642076870515	795.99712701925	707.298221288019	633.906617355954	675.817314452122
FBgn0040467	49.7239019154931	-0.482867661297379	0.338594123313175	-1.42609581221456	0.153840687444703	1	16.2857555883081	21.6549011471188	26.3483369570832	16.2364010625657	13.3326439596855	15.7690706705495
FBgn0261461	721.126815684667	-0.132628195788277	0.0930441433674851	-1.42543303627882	0.154032064108424	1	1215.61532784157	1140.87137096137	1121.88445254107	1073.63202026216	1018.12917510325	1081.3077031234
FBgn0266129	48.6471294251319	0.3737543286336	0.262220828988607	1.42534187720778	0.154058400454383	1	90.7349239920022	102.575847538984	69.3377288344294	107.566157039498	128.478205429696	105.878045930833
FBgn0005648	243.765004744486	0.240143775781354	0.16852139379146	1.42500468562777	0.154155846657876	1	173.32697018985	151.584308029832	191.372131583025	223.250514610279	215.746420438547	168.954328613031
FBgn0086655	415.113822511483	0.381385498563812	0.267826342684433	1.42400293690744	0.154445621903762	1	828.246998491097	664.463545724752	479.817083534252	774.273375671102	913.892140509349	883.067957550773
FBgn0016920	20.1087605099778	0.428699611025017	0.301135716796081	1.42360931338915	0.154559598328691	1	36.0613159455393	51.287923769492	24.9615823803946	47.6944281212868	54.5426343805314	50.6862985839092
FBgn0036877	23.9399487168551	0.447356615297874	0.314331073269938	1.42320201004658	0.154677603097445	1	22.1020968698467	26.213827704407	40.2158827239691	50.7387533205179	37.5738147954772	30.4117791503455
FBgn0032879	109.749794396212	-0.215165034476921	0.151185981086632	-1.42318112387436	0.154683656126715	1	251.265943362468	226.806596225087	234.361523460371	213.102763946175	196.353483769913	203.87155652639
FBgn0029970	156.975905167998	-1.13511139356177	0.797841855453333	-1.42272730592305	0.154815221706991	1	3.48980476892316	2.27946327864409	6.93377288344294	0	2.42411708357917	3.37908657226061
FBgn0038471	209.745302211533	0.259150861378665	0.182326815016866	1.42135352583597	0.155214009992157	1	88.4083874793867	103.715579178306	97.0728203682012	122.787783035653	107.873210219273	114.888943456861
FBgn0039250	234.899073785985	0.32731449386128	0.230348222419254	1.42095515399958	0.155329797265446	1	51.1838032775397	38.7508757369495	51.3099193374778	50.7387533205179	72.7235125073752	54.0653851561698
FBgn0037222	15.7235892799801	0.465412041382165	0.327729102441035	1.42011203129543	0.155575068171219	1	18.6122921009235	22.7946327864409	15.2543003435745	26.3841517266693	26.6652879193709	25.9063303873314
FBgn0036005	181.294080529939	0.241692683366287	0.170227932749057	1.41981800203484	0.155660672650938	1	116.326825630772	111.69370065356	112.327120711776	141.05373423104	146.65908355654	114.888943456861
FBgn0261805	28.4892690664457	-0.362259516892936	0.255272160737571	-1.41911094357583	0.155866673918546	1	55.8368763027706	44.4495339335597	51.3099193374778	39.5762275900039	38.7858733372668	39.4226766763738
FBgn0061198	117.366554378603	-0.352152155127691	0.248250755262913	-1.41853407356099	0.156034898010213	1	79.102241428925	69.5236299986447	88.7522929080697	63.9308291838525	59.3908685476898	61.9499204914446
FBgn0031313	1053.24063099491	-0.205122306341665	0.144629033975737	-1.41826506547832	0.15611339194887	1	1734.43297015481	1792.79786865358	2046.84975519236	1737.29491369453	1604.76550932941	1491.30354055768
FBgn0001977	405.108822546959	-0.201997735114348	0.142451621505137	-1.41800937735948	0.156188027016833	1	335.021257816623	325.963248846105	399.385318086314	292.255219126183	336.952274617505	291.727807405166
FBgn0036887	473.967795166755	-0.240435895123404	0.169563579355294	-1.41796897681434	0.156199822365496	1	246.612870337237	254.160155568816	318.953552638375	239.486915672844	216.958478980336	235.409697867489
FBgn0030159	245.030649149432	-0.298553230091055	0.210689845818199	-1.41702714210855	0.15647499209294	1	383.878524581548	364.714124583054	465.949537767366	359.230373509266	329.679923366768	297.359618358934
FBgn0036731	11.7711718940109	0.584834748076189	0.412959695079661	1.41620297342425	0.156716085583963	1	22.1020968698467	23.9343644257629	12.4807911901973	24.3546015938486	39.9979318790564	24.7799681965778
FBgn0036406	69.5419459059766	-0.387967958225394	0.274091358942035	-1.41546949791818	0.15693088545249	1	52.3470715338474	29.6330226223731	56.8569376442321	36.5319023907729	24.2411708357917	43.928125439388
FBgn0003861	5435.70558306908	-0.173468266544123	0.122551967661702	-1.41546700435666	0.156931616077803	1	11131.3139446086	11017.7857573262	10783.4035883305	9493.22074626889	9601.92776805711	10106.8479376315
FBgn0034527	335.994353203716	-0.1986885689852	0.140420737044413	-1.41495175974157	0.157082640510487	1	255.919016387698	239.343644257629	332.821098405261	251.664216469769	242.411708357917	224.146075959954
FBgn0039602	189.44831552661	0.203902348553738	0.144216892728695	1.41385897793073	0.157403312662387	1	148.898336807388	155.003502947798	163.637040049253	187.733387285916	183.020839810228	166.701604231524
FBgn0028381	180.221279156252	1.66585177699696	1.17988330498439	1.41187842048414	0.157985762724988	1	0	1.13973163932204	1.38675457668859	5.07387533205179	1.21205854178959	1.12636219075354
FBgn0027492	1002.04203777638	0.249041626828	0.176395389307503	1.41183750780388	0.157997811671596	1	1497.12624586804	1400.73018472679	1055.32023286002	1619.58100599093	1562.34346036678	1518.33623313577
FBgn0034734	350.055809626591	0.296696675266348	0.210339284182254	1.41056235129747	0.158373699321063	1	239.63326079939	189.195452127459	212.173450233354	237.457365540024	281.197581695184	269.200563590095
FBgn0024362	331.053503043775	0.185450042312698	0.131502013131399	1.41024489204886	0.158467384398981	1	238.469992543083	253.020423929494	245.45556007388	254.708541669	283.621698778763	300.738704931194
FBgn0019686	1235.0543383533	-0.290464119948767	0.205967334540061	-1.41024362235591	0.158467759181009	1	86.0818509667713	58.1263136054242	62.4039559509865	52.7683034533386	65.4511612566377	51.8126607746627
FBgn0034894	345.199604962099	0.178468474074131	0.126577456108792	1.40995465986249	0.158553071234883	1	273.368040232314	268.976666880002	205.239677349911	300.373419657466	294.53022565487	254.557855110299
FBgn0033104	75.2146331080471	0.288282029166354	0.204536357265493	1.40944149500109	0.158704661534463	1	44.2041937396934	49.0084604908479	49.9231647607892	60.8865039846214	58.1788100059002	55.1917473469233
FBgn0038768	192.427519672352	0.249236831512952	0.176932493523275	1.4086549426274	0.158937224159185	1	93.0614605046176	79.7812147525431	97.0728203682012	106.551381973087	95.7526248013774	117.141667838368
FBgn0037891	1262.70001594875	-0.137759296166511	0.0978030157658869	-1.40853832663267	0.158971726350864	1	1295.8808375268	1448.59891357832	1361.79299430819	1195.4050282314	1208.42236616422	1329.10738508917
FBgn0038525	53.9159878680404	-0.403698382832289	0.286645639036004	-1.40835347849678	0.15902642742354	1	86.0818509667713	104.855310817628	124.807911901973	90.3149809105218	79.9958637581128	67.5817314452123
FBgn0024361	242.909655045613	-0.699404930757466	0.497474259779072	-1.40591179746279	0.159750317671584	1	3.48980476892316	11.3973163932204	16.6410549202631	5.07387533205179	4.84823416715835	9.0108975260283
FBgn0262291	25.0500618700142	-2.03498598566079	1.44773160216942	-1.40563760755886	0.159831762703661	1	1.16326825630772	1.13973163932204	2.77350915337718	0	0	1.12636219075354
FBgn0030590	10.5834406227263	-0.616776501121858	0.43890922171454	-1.40524844457016	0.159947413104392	1	11.6326825630772	19.3754378684747	31.8953552638375	9.13297559769321	19.3929366686334	12.3899840982889
FBgn0004893	126.630719875266	0.269960573890257	0.192203438336464	1.40455642327103	0.160153222397132	1	237.306724286775	193.754378684747	158.090021742499	233.398265274382	263.01670356834	216.261540624679
FBgn0035557	25.3739151600619	-0.518970205177747	0.369522719108558	-1.40443382325644	0.160189704890611	1	45.3674619960011	28.4932909830511	18.0278094969517	22.3250514610279	31.5135220865293	11.2636219075354
FBgn0036769	470.065051328172	0.151199421887481	0.107755486750273	1.40317144349124	0.160565720898329	1	466.470570779396	402.325268680682	443.761464540348	519.564834002103	459.370187338254	476.451206688746
FBgn0266724	101.417794527899	-0.290466448633853	0.207044863323367	-1.40291550329455	0.160642037230421	1	72.1226318910787	77.501751473899	101.233084098267	64.9456042502628	73.9355710491648	65.3290070637052
FBgn0034923	100.871094220445	0.330091220971986	0.235304108933409	1.40282812088676	0.160668099221324	1	61.6532175843092	66.1044350806785	58.2436922209207	76.1081299807768	66.6632197984273	91.2353374510365
FBgn0266418	496.840839396259	0.220148845889998	0.157062448970548	1.40166441649767	0.161015481220848	1	1059.73738149633	903.807189982381	729.432907338198	1058.410394266	978.131243224197	1102.70858474771
FBgn0036921	1041.14535326433	-0.207889486335065	0.148334174736689	-1.4014942052571	0.161066339179542	1	1065.55372277787	1113.51781161764	1289.68175632039	1084.79454599267	993.888004267462	922.490634227147
FBgn0005322	723.138529736003	-0.219445456884125	0.156628819242215	-1.40105414792643	0.161197881550396	1	487.409399392935	547.071186874581	642.067369006817	529.712584666206	498.15606067552	409.995837434288
FBgn0085485	64.3251641716947	-0.337836472774734	0.241154788715784	-1.40091131747293	0.161240594008072	1	93.0614605046176	115.112895571526	159.476776319188	97.4184063753943	86.0561564670607	105.878045930833
FBgn0040751	50.7169936488768	-0.373833900997549	0.266883994254887	-1.40073555943756	0.161293164961226	1	37.2245842018471	38.7508757369495	45.7629010307234	31.4580270587211	36.3617562536876	25.9063303873314
FBgn0019972	456.28246727705	-0.150373447980417	0.107422001331968	-1.39983845130305	0.161561700492304	1	280.347649770161	270.116398519324	303.699252294801	279.063143262848	249.684059608655	237.662422248996
FBgn0004914	968.643126905881	0.218158230840419	0.155952172801308	1.39887907248567	0.161849249187834	1	1768.16774958773	1546.61583456001	1299.38903835721	1694.6743609053	1818.08781268438	1857.37125255258
FBgn0083952	72.4981267572482	-0.385859132192922	0.275902018973767	-1.39853681980344	0.161951923914109	1	22.1020968698467	33.0522175403393	41.6026373006577	30.4432519923107	18.1808781268438	23.6536060058243
FBgn0039972	2203.31779866362	0.398165754912635	0.284931434779628	1.39740901252466	0.162290610490429	1	114.000289118157	80.9209463918651	62.4039559509865	109.595707172319	129.690263971486	101.372597167818
FBgn0005631	164.28342185269	0.300922101314173	0.21547634785592	1.39654353857616	0.162550879199578	1	374.572378531086	316.845395731528	281.511179067783	405.910026564143	391.494908998037	402.111302099013
FBgn0261641	257.316634880351	0.381465673801519	0.273388521316284	1.39532439754558	0.162918038090983	1	407.143889707702	372.692246058308	328.660834675196	447.515804286967	483.611358174045	513.621158983613
FBgn0037011	256.314139306907	-0.30262282412593	0.217071000611957	-1.39411908211041	0.163281647748359	1	234.980187774159	260.998545404748	339.754871288704	236.442590473613	212.110244813178	227.525162532215
FBgn0038923	172.299213501221	-0.247981145058099	0.177943271118116	-1.39359664178306	0.163439443196099	1	132.61258121908	124.230748686103	149.769494282368	109.595707172319	110.297327302852	121.647116601382
FBgn0003388	13.7805718535491	0.643431965580852	0.461782515499391	1.39336580313141	0.163509201235866	1	9.30614605046176	12.5370480325425	11.0940366135087	27.3989267930796	10.9085268761063	12.3899840982889
FBgn0035849	388.360724914283	-0.162810769528747	0.117006682426499	-1.39146556549042	0.16408429454316	1	486.246131136627	411.443121795258	364.716453669099	373.437224439011	385.434616289089	371.699522948667
FBgn0039234	458.86424011978	0.178180200304579	0.128107420010771	1.3908655742938	0.164266193767765	1	312.919160946777	280.373983273223	298.152233988047	326.757571384135	344.224625868243	337.908657226061
FBgn0036576	247.547504037956	0.337347341866327	0.24257693780977	1.39068183856322	0.164321927266282	1	481.593058111396	495.783263105089	352.235662478902	532.756909865437	587.84839276795	560.928370995262
FBgn0036306	183.274621715857	0.25792673673097	0.185559937468188	1.38999150490223	0.164531457005557	1	93.0614605046176	112.833432292882	105.393347828333	117.713907703601	133.326439596855	121.647116601382
FBgn0036186	13.2287880645868	-0.689720998665126	0.496224080284537	-1.38993859038368	0.16454752589363	1	18.6122921009235	7.97812147525431	27.7350915337718	14.206850929745	10.9085268761063	7.88453533527476
FBgn0034639	58.9143568474692	0.366886394690522	0.264144251422256	1.38896225344698	0.164844228465555	1	94.2247287609253	60.4057768840683	55.4701830675435	78.1376801135975	83.6320393834815	110.383494693847
FBgn0031678	47.7299832955078	-0.418086639155119	0.301070532745817	-1.38866675307641	0.164934108504389	1	34.8980476892316	22.7946327864409	41.6026373006577	20.2955013282071	24.2411708357917	29.285416959592
FBgn0031598	281.836830411503	0.155404378621908	0.111912278570725	1.38862670483201	0.164946292504393	1	251.265943362468	263.278008683392	232.974768883683	271.959717797976	281.197581695184	281.590547688384
FBgn0029892	103.482820698962	-0.358175971839107	0.258061613740022	-1.38794750078538	0.165153032039856	1	72.1226318910787	60.4057768840683	73.4979925644952	47.6944281212868	52.1185172969523	60.823558300691
FBgn0039257	74.1711692351792	0.343677951807077	0.247617697544543	1.38793775733761	0.165155999217796	1	186.122921009235	160.702161144408	94.299311214824	166.423110891299	201.201717937072	194.860659000362
FBgn0263143	192.925172299804	-0.475758041590996	0.342937109248916	-1.38730405301712	0.16534906775652	1	23.2653651261544	15.9562429505086	18.0278094969517	9.13297559769321	16.9688195850542	15.7690706705495
FBgn0032285	522.073172546498	0.707010258604952	0.509797491504074	1.38684530698461	0.165488938302373	1	1516.90180622527	957.374577030517	691.990533767606	1921.98397578122	1559.9193432832	1687.2905617488
FBgn0039622	13.0180215279613	-0.549548043296872	0.396494149541512	-1.38601803817873	0.165741395561053	1	19.7755603572312	27.3535593437291	19.4145640736402	14.206850929745	16.9688195850542	14.642708479796
FBgn0051469	54.012916590596	-0.505536122112833	0.364831752054933	-1.38566920029678	0.165847937071235	1	41.8776572270779	55.8468503267801	90.1390474847583	40.5910026564143	46.0582245880043	45.0544876301415
FBgn0030481	513.825230335339	-0.141410030130742	0.102065898337718	-1.38547773971323	0.165906434551786	1	538.593202670475	518.57789589153	533.900512025107	460.707880150302	500.5801777591	482.083017642514
FBgn0039269	334.58767929133	-0.296473051315057	0.214121474389695	-1.38460213838938	0.166174157250325	1	195.429067059697	251.880692290172	293.991970257981	209.043663680534	193.929366686334	199.366107763376
FBgn0027549	514.784776509797	0.133108070564072	0.0961644371702648	1.38417147212536	0.166305956338249	1	393.184670632009	386.369025730173	373.03698112923	404.895251497732	415.736079833829	444.913065347647
FBgn0033203	18.7009693867317	0.657950403940976	0.475361154097258	1.38410637526844	0.166325885112601	1	5.8163412815386	12.5370480325425	2.77350915337718	11.1625257305139	10.9085268761063	12.3899840982889
FBgn0286203	669.017854357446	-0.155452084390024	0.112349786353973	-1.38364379172251	0.166467552322191	1	1151.63557374464	1042.85444997967	1095.53611558399	1006.65686587907	997.52417989283	949.523326805232
FBgn0032518	8514.28221210641	-0.228691125525548	0.165362254298586	-1.38297053638742	0.166673900301907	1	6528.26145439893	7025.30582478108	7279.0747730384	6110.97544992317	5994.8415476913	5672.35999263482
FBgn0029820	781.791654071453	-0.130137305428292	0.0941189809522981	-1.38268927384848	0.16676016219286	1	973.655530529562	1124.91512801086	1106.63015219749	886.913408042652	997.52417989283	1045.26411301928
FBgn0086704	468.619214929331	-0.186338106354813	0.134787138332804	-1.38246207063707	0.166829868843136	1	906.185971663714	926.601822768822	937.446093841486	731.652822881867	802.382754664707	901.08975260283
FBgn0002932	316.977454540809	0.212549001366639	0.153792948979215	1.38204646427168	0.16695743483312	1	373.409110274778	276.954788355257	280.124424491095	348.067847778752	378.162265038351	353.677727896611
FBgn0032514	415.876553918351	-0.212443797437602	0.153761039921497	-1.38164906757957	0.167079480102391	1	171.000433677235	153.863771308476	159.476776319188	148.157159695912	124.842029804328	144.174360416453
FBgn0038806	200.240749269627	-0.234994941947216	0.170163762339805	-1.3809928666125	0.167281153985117	1	124.469703424926	119.671822128815	135.901948515482	115.684357570781	115.145561470011	91.2353374510365
FBgn0032935	466.277342553391	-0.168343573766156	0.121911590511886	-1.38086602807256	0.167320157061214	1	677.022125171093	592.660452447463	636.520350700062	589.584313584417	555.122812139631	550.79111127848
FBgn0013576	2685.34567045437	0.305535077534005	0.22142882182608	1.37983427367006	0.16763767723432	1	5427.80968393182	4674.0394528597	3231.13816368441	5043.43208005947	5654.25309744843	5782.74348732866
FBgn0031908	238.993144405228	-0.227989297242973	0.16525259697085	-1.37964123664084	0.167697134185672	1	326.878380022469	330.522175403393	370.263471975853	316.609820720031	260.592586484761	298.485980549687
FBgn0035768	477.564769586044	-0.868506062186395	0.629731207163948	-1.37916948105175	0.167842505333957	1	8.14287779415404	4.55892655728818	5.54701830675435	2.02955013282071	6.06029270894794	2.25272438150707
FBgn0030310	622.001934308741	-0.489284057329046	0.354822861063039	-1.37895302423064	0.167909238012544	1	568.838177334475	512.87923769492	927.738811804666	476.944281212868	540.578109638156	413.374924006548
FBgn0034186	118.478059370147	-0.302429861507772	0.219457559876432	-1.37807903121706	0.168178888826052	1	54.6736080464629	56.9865819661022	61.0172013742979	54.7978535861593	43.6341075044251	40.5490388671274
FBgn0030028	108.321769230127	-0.39081706073316	0.283782467946866	-1.37717126628956	0.168459303253689	1	23.2653651261544	22.7946327864409	38.8291281472805	16.2364010625657	29.0894050029501	19.1481572428101
FBgn0263602	257.547871105491	-0.250550674606356	0.181987526480929	-1.37674641471987	0.168590663128149	1	140.755459013234	110.553969014238	113.713875288464	87.2706557112907	117.56967855359	103.625321549325
FBgn0032354	192.837510447933	0.3468782511968	0.252076713172696	1.37608209354569	0.168796218673871	1	29.081706407693	45.5892655728818	30.5086006871489	41.6057777228246	43.6341075044251	49.5599363931557
FBgn0028897	69.5306261835387	-0.445975848579051	0.324462420286116	-1.37450694039015	0.16928435709889	1	32.5715111766162	18.2357062291527	24.9615823803946	20.2955013282071	20.604995210423	14.642708479796
FBgn0034763	153.624308220661	0.280183421999845	0.20384791844131	1.3744728135672	0.169294944673513	1	61.6532175843092	69.5236299986447	90.1390474847583	101.477506641036	81.2079222999024	83.3508021157618
FBgn0010622	150.016206232736	-0.223828264151668	0.162918321041562	-1.3738679770372	0.169482672793608	1	105.857411324003	125.370480325425	126.194666478662	102.492281707446	95.7526248013774	107.004408121586
FBgn0035039	163.877891760126	0.225905634453091	0.164551293365083	1.37285845545975	0.169796354009762	1	80.2655096852327	80.9209463918651	72.1112379878066	87.2706557112907	95.7526248013774	91.2353374510365
FBgn0032987	12069.1553112697	-0.263161320014556	0.191740243803583	-1.37248871073793	0.169911350901084	1	9153.75790888545	10173.2446125886	11670.9265174112	8949.30131067294	8512.28713898827	8366.61835291728
FBgn0039244	54.9608099293799	-0.370063756148252	0.269682922720862	-1.37221798256499	0.169995588979911	1	79.102241428925	55.8468503267801	51.3099193374778	55.8126286525696	35.149697711898	52.9390229654163
FBgn0283680	570.643364522623	-0.237828881763983	0.173347533440885	-1.37197730503092	0.170070502971903	1	1539.00390309511	1193.29902637018	877.815647043877	1049.27741866831	975.707126140618	1038.50593987476
FBgn0267378	660.661608359171	0.115858903833181	0.0845021724283984	1.37107603868235	0.170351253591259	1	647.9404187634	716.891201133566	647.614387313571	723.534622350585	723.598949448384	735.51451056206
FBgn0031535	400.900220460534	-0.228519128855163	0.166688823075911	-1.37093252347876	0.170395991591454	1	141.918727269542	142.466454915255	156.703267165811	123.802558102064	123.629971262538	128.405289745903
FBgn0264574	838.826093815255	0.277830764108075	0.202658586810915	1.37093013664058	0.170396735715032	1	2146.22993288774	1849.78445061968	1146.84603492146	2052.88995934815	2050.80305270798	2134.45635147795
FBgn0037922	227.243753141046	0.250309074894945	0.18264289037177	1.37048353968468	0.170536010180757	1	91.8981922483099	83.2004096705092	97.0728203682012	114.66958250437	103.024976052115	104.751683740079
FBgn0035944	356.362895323547	-0.165202194720474	0.120608815302137	-1.36973565577795	0.170769434118105	1	303.613014896315	308.867274256274	296.765479411358	300.373419657466	258.168469401182	251.178768538039
FBgn0033554	39.4610439542589	-0.556945586588838	0.406620748231001	-1.36969298544608	0.170782759276569	1	12.7959508193849	12.5370480325425	19.4145640736402	12.1773007969243	9.6964683343167	7.88453533527476
FBgn0250850	797.38884432211	0.178739826637644	0.130505501882644	1.36959610176722	0.170813017156122	1	239.63326079939	232.505254421697	217.720468540108	247.605116204127	271.501113360868	263.568752636328
FBgn0027570	500.935404149438	0.174806838311165	0.127639600748015	1.3695345119127	0.170832254458767	1	652.593491788631	680.41978867526	556.088585252124	769.199500339051	660.571905275325	703.976369220961
FBgn0011291	72.8125074213406	0.331277342847582	0.24192486218685	1.36933980184195	0.170893081912026	1	26.7551698950776	34.1919491796613	47.149655607412	52.7683034533386	43.6341075044251	37.1699522948667
FBgn0024542	200.631852590038	-0.287312579294106	0.209891326153512	-1.36886351884769	0.1710419411549	1	55.8368763027706	77.501751473899	104.006593251644	63.9308291838525	73.9355710491648	55.1917473469233
FBgn0038595	14.565927701401	0.865783060106121	0.63265731385276	1.36848660585882	0.1711598117418	1	2.32653651261544	5.69865819661022	4.16026373006577	8.11820053128286	8.48440979252711	5.63181095376769
FBgn0030870	493.691076854021	0.179477318239394	0.13116254601075	1.36835799317805	0.171200046218855	1	373.409110274778	344.198955075257	320.340307215064	381.555424970294	407.251670041301	388.59495580997
FBgn0028746	77.0904945138313	0.281866813281122	0.20600699736507	1.3682390253066	0.171237269772059	1	76.7757049163095	58.1263136054242	85.9787837546925	94.3740811761632	72.7235125073752	99.1198727863113
FBgn0032397	431.914974431058	0.208037852343615	0.152258110671961	1.36634988721114	0.171829169760093	1	186.122921009235	175.518672455595	138.675457668859	190.777712485147	215.746420438547	174.586139566798
FBgn0051632	16.310631407021	-0.486353841015181	0.356140001106325	-1.36562542681068	0.172056561584742	1	33.7347794329239	26.213827704407	23.574827803706	19.2807262617968	13.3326439596855	27.0326925780849
FBgn0036967	254.067657966201	0.183121499902783	0.134187667461248	1.36466713646145	0.172357693162864	1	176.816774958773	156.14323458712	152.543003435745	180.629961821044	198.777600853492	173.459777376045
FBgn0040091	79.4214011458184	0.270702884716787	0.198444834810755	1.36412159568145	0.172529299003796	1	90.7349239920022	78.641483113221	70.724483411118	91.3297559769321	99.3888004267462	100.246234977065
FBgn0039650	41.8603823143368	-0.408420075508714	0.29982851628991	-1.36217888999526	0.17314143621214	1	29.081706407693	33.0522175403393	38.8291281472805	23.3398265274382	24.2411708357917	28.1590547688384
FBgn0267348	428.225390849494	0.215018580820305	0.157900351176817	1.36173592533387	0.173281239264027	1	758.450903112634	707.773348018989	687.83027003754	781.376801135975	843.592745085553	876.309784406252
FBgn0029685	510.279239253685	-0.163829680380533	0.120311069608658	-1.36171742894008	0.173287078702605	1	390.858134119394	357.875734747122	346.688644172147	310.521170321569	332.104040450347	336.782295035308
FBgn0032835	73.8922254321417	-0.324519543767181	0.238430175861726	-1.36106741772224	0.173492385127395	1	191.939262290774	149.304844751188	145.609230552302	134.965083832577	118.78173709538	135.163462890425
FBgn0036774	257.123039391747	-0.23038655395135	0.169472081896669	-1.35943661854477	0.174008274027145	1	132.61258121908	134.488333440001	189.985377006337	135.979858898988	121.205854178959	129.531651936657
FBgn0027280	1085.46939143136	-0.105149724258421	0.0774117133207405	-1.3583180083194	0.174362798450414	1	1105.10484349233	1257.12399817221	1216.18376375589	1173.07997677037	1079.94416073452	1071.17044340661
FBgn0029121	141.186169341868	-0.292061326040021	0.215048343459767	-1.3581193946498	0.17442580200881	1	77.9389731726173	74.0825565559329	72.1112379878066	53.7830785197489	77.5717466745336	52.9390229654163
FBgn0044047	170.961295058404	0.280527005158984	0.206559028583471	1.35809607104935	0.174433201757826	1	267.551698950776	280.373983273223	293.991970257981	321.683696052083	372.101972329403	328.897759700033
FBgn0085434	1087.73019999075	0.31918738530791	0.23512931269247	1.35749720718735	0.174623280249359	1	3299.02877488869	2739.91486093019	1705.70812932696	2918.49309099619	3358.61421929895	3388.09746978664
FBgn0035431	78.7024530820502	-0.379445104060451	0.27995594560583	-1.35537433662759	0.175298321831959	1	39.5511207144625	39.8906073762715	24.9615823803946	29.4284769259004	31.5135220865293	20.2745194335637
FBgn0053156	356.644648207084	0.35618993824314	0.26285655517078	1.35507344685287	0.175394157674366	1	79.102241428925	80.9209463918651	84.5920291780039	102.492281707446	89.6923320924295	120.520754410629
FBgn0036545	164.756076219719	-0.226349782118415	0.167043328192131	-1.35503635235327	0.175405975280405	1	193.102530547082	206.29142671729	221.880732270174	180.629961821044	184.232898352017	165.57524204077
FBgn0052580	25.0812134207382	-0.592415029015944	0.43745169105922	-1.35424103077875	0.175659492616117	1	18.6122921009235	20.5151695077968	6.93377288344294	9.13297559769321	12.1205854178959	10.1372597167818
FBgn0036978	14.327382648906	-0.916099829104958	0.676635872075992	-1.35390372711731	0.175767094294367	1	4.65307302523088	5.69865819661022	11.0940366135087	5.07387533205179	6.06029270894794	0
FBgn0039385	103.918070618406	0.426620614842585	0.315315653421184	1.35299535628422	0.176057113905912	1	60.4899493280015	51.287923769492	48.5364101841006	67.9899294494939	67.8752783402169	79.9717155435012
FBgn0030660	268.568325431441	0.314398914423579	0.232510015414307	1.35219514679123	0.17631289584265	1	34.8980476892316	30.7727542616952	48.5364101841006	45.6648779884661	49.6944002133731	45.0544876301415
FBgn0010438	319.030292560305	-0.287133048870972	0.212437311702523	-1.35161307855865	0.17649912426047	1	98.8778017861562	76.3620198345769	84.5920291780039	91.3297559769321	60.6029270894794	59.6971961099375
FBgn0036289	164.302773831159	0.232971759765711	0.172407804537869	1.35128314167784	0.176604750204143	1	324.551843509854	368.13331950102	253.776087534012	355.171273243625	378.162265038351	381.836782665449
FBgn0039698	200.602192162718	-0.199226380804803	0.147457765624365	-1.35107418697984	0.176671669290943	1	177.980043215081	189.195452127459	152.543003435745	148.157159695912	163.627903141594	143.047998225699
FBgn0051549	453.496014914125	-0.202820523020077	0.150207234175998	-1.35027133768026	0.176928962734854	1	279.184381513853	254.160155568816	349.462153325524	259.782417001051	256.956410859393	247.799681965778
FBgn0026263	201.194934203127	0.282463527942981	0.2092067008195	1.35016482185571	0.1769631194013	1	60.4899493280015	60.4057768840683	66.5642196810523	79.1524551800078	67.8752783402169	79.9717155435012
FBgn0035907	209.864151896349	-0.259724712935269	0.192605229766878	-1.34848214272079	0.177503359862841	1	73.2859001473864	70.6633616379667	83.2052746013153	61.9012790510318	60.6029270894794	66.4553692544587
FBgn0005613	16.2731427309388	0.410756111736999	0.304612844180463	1.34845302679901	0.177512718609696	1	27.9184381513853	35.3316808189834	29.1218461104604	43.6353278556454	36.3617562536876	42.8017632486344
FBgn0032261	107.674769790695	-0.322317695629357	0.239044975342006	-1.34835586971954	0.177543950522373	1	83.7553144541559	59.2660452447463	97.0728203682012	67.9899294494939	64.2391027148481	58.5708339191839
FBgn0000146	313.08075780125	-0.523407398529174	0.388215480335128	-1.34823938004054	0.177581402446306	1	15.1224873320004	11.3973163932204	15.2543003435745	12.1773007969243	7.27235125073752	9.0108975260283
FBgn0035590	76.5539528294531	-0.365400478847769	0.271137059493541	-1.34765966530102	0.177767870672399	1	60.4899493280015	42.1700706549156	72.1112379878066	58.8569538518007	44.8461660462147	30.4117791503455
FBgn0030206	116.325509811776	0.246535631242496	0.182975430762827	1.34737013715276	0.177861053455	1	89.5716557356945	107.134774096272	104.006593251644	116.699132637191	104.237034593905	135.163462890425
FBgn0002354	184.901221237783	-0.224499537876561	0.166645428001758	-1.34716889967237	0.177925841868037	1	200.082140084928	177.798135734239	226.04099600024	170.48221115694	163.627903141594	181.34431271132
FBgn0031238	156.386246375729	0.245086102437676	0.181970622195685	1.34684433937979	0.178030371078132	1	152.388141576311	126.510211964747	131.741684785416	162.364010625657	162.415844599805	162.196155468509
FBgn0040232	533.265433101134	0.859999153630888	0.638561410403244	1.34677595548376	0.178052400903188	1	4.65307302523088	0	6.93377288344294	7.1034254648725	10.9085268761063	2.25272438150707
FBgn0010078	7867.14124512171	-0.210313568160913	0.156228552136093	-1.34619162301207	0.178240725957715	1	6286.30165708692	6999.09199707667	6892.17024614229	5940.49323876623	5436.0825599263	6063.20767282629
FBgn0040491	98.8677162799166	-0.239118949867785	0.177760646644132	-1.34517371747915	0.178569141647845	1	139.592190756926	143.606186554578	113.713875288464	120.758232902832	113.933502928221	102.498959358572
FBgn0035170	59.2629836102457	0.391969072517855	0.291468335788453	1.34480842132487	0.178687110021615	1	125.632971681234	156.14323458712	116.487384441841	175.556086488992	151.507317723698	195.987021191116
FBgn0010415	1804.61876248146	0.233944920256076	0.174095418993321	1.34377413035234	0.179021437366133	1	3664.29500736932	3322.31772862376	2491.99797430939	3518.22515524471	3950.09878769227	3682.07800157331
FBgn0027054	374.095083751944	-0.159691297192347	0.118932498000129	-1.34270531501133	0.17936741300529	1	260.572089412929	249.601229011528	256.549596687389	234.413040340792	246.047883983286	206.124280907897
FBgn0032640	744.048885070101	-0.171426964965442	0.12779826261678	-1.34138728849145	0.179794742516001	1	523.470715338474	599.498842283395	543.607794061927	465.781755482354	518.761055885943	496.72572612231
FBgn0044871	272.900421367571	-0.216227854152542	0.16120210791794	-1.34134631950726	0.179808037562116	1	167.510628908312	192.614647045425	177.504585816139	163.378785692067	153.931434807278	145.300722607206
FBgn0023542	509.42649190081	-0.156876639258155	0.11702003494026	-1.34059641443657	0.180051522038543	1	411.796962732933	379.530635894241	325.887325521818	337.920097114649	329.679923366768	336.782295035308
FBgn0261286	354.231448293341	0.237017837542935	0.176860228518867	1.34014209711174	0.180199152119298	1	143.08199552585	132.208870161357	105.393347828333	139.024184098219	162.415844599805	149.80617137022
FBgn0051908	461.938633415564	-0.143966895809193	0.107584427165917	-1.33817597585167	0.180839078596267	1	440.878669140626	441.076144417631	499.231647607892	409.969126829784	415.736079833829	422.385821532577
FBgn0036285	24.8831145504226	-0.369510433445431	0.276319775330616	-1.33725656443992	0.181138903893033	1	54.6736080464629	39.8906073762715	51.3099193374778	33.4875771915418	42.4220489626356	37.1699522948667
FBgn0038221	14.5089502882193	0.489734317680458	0.366240529654661	1.33719312317029	0.181159606054143	1	31.4082429203084	15.9562429505086	11.0940366135087	26.3841517266693	20.604995210423	36.0435901041132
FBgn0083167	968.158373594233	-0.199569267593205	0.149271028182057	-1.33695915425599	0.181235969995307	1	822.430657209558	960.793771948483	934.672584688109	823.99735392521	764.80893986923	777.189911619941
FBgn0032002	289.927616422467	-0.483593070895631	0.361776060156673	-1.33671938017735	0.181314253442407	1	140.755459013234	134.488333440001	176.117831239451	108.580932105908	128.478205429696	85.6035264972688
FBgn0037794	113.701017812251	0.261192641268244	0.195400081337595	1.33670692192282	0.181318321603352	1	74.4491684036941	85.4798729491533	69.3377288344294	88.2854307777011	84.8440979252711	102.498959358572
FBgn0030342	244.551513841893	-0.18007128330007	0.134737451838178	-1.3364605077758	0.18139880044239	1	189.612725778158	158.422697865764	180.278094969517	160.334460492836	162.415844599805	143.047998225699
FBgn0287720	2035.26956565077	-1.10341662940388	0.825891022907256	-1.33603175091999	0.18153889558514	1	6.97960953784632	6.83838983593226	2.77350915337718	1.01477506641036	3.63617562536876	3.37908657226061
FBgn0038829	427.33068017739	0.137609980075435	0.103019116308389	1.33577131125351	0.18162403273015	1	489.73593590555	479.827020154581	470.109801497432	548.993310928003	517.548997344154	517.000245555874
FBgn0039930	215.790562486867	-0.205373348007276	0.153901551507737	-1.3344462482365	0.182057651733041	1	233.816919517852	251.880692290172	235.74827803706	232.383490207972	201.201717937072	191.481572428101
FBgn0260243	471.87959657531	-0.243441969291698	0.182437599820551	-1.33438485011397	0.182077762502702	1	166.347360652004	152.724039669154	127.58142105535	132.935533699757	121.205854178959	123.899840982889
FBgn0031227	111.830601376437	0.3179372886614	0.238313697262034	1.33411252611224	0.182166981269639	1	40.7143889707702	42.1700706549156	33.2821098405261	49.7239782541075	52.1185172969523	43.928125439388
FBgn0033474	348.48708722962	0.16764645861934	0.125664367580702	1.33408110705429	0.182177276864696	1	243.123065568314	209.710621635256	223.267486846863	233.398265274382	249.684059608655	277.08509892537
FBgn0031996	188.532046150717	0.231267923934572	0.173501385257685	1.33294569141964	0.182549626672875	1	102.367606555079	94.5977260637297	79.0450108712495	121.773007969243	90.9043906342191	111.5098568846
FBgn0031351	85.3259003728166	0.394067599608365	0.295644391726797	1.33291078956952	0.182561081367309	1	16.2857555883081	22.7946327864409	22.1880732270174	20.2955013282071	27.8773464611605	32.6645035318526
FBgn0029175	248.963823287536	0.220699261160549	0.165592508135187	1.33278530318759	0.182602270066722	1	279.184381513853	275.815056715935	230.201259730306	316.609820720031	311.499045239924	288.348720832906
FBgn0031926	20.1273930848384	0.381522669875271	0.286319091672046	1.33250866244111	0.182693096865224	1	41.8776572270779	46.7289972122038	36.0556189939033	57.8421787853904	50.9064587551627	54.0653851561698
FBgn0038387	210.064785791621	-0.21505803180446	0.161414020668747	-1.33233798968307	0.1827491489148	1	133.775849475388	148.165113111866	138.675457668859	134.965083832577	115.145561470011	111.5098568846
FBgn0015033	250.144864542308	-0.186788567804967	0.14023111596956	-1.33200514389056	0.182858498221447	1	380.388719812625	413.722585073902	425.733655043397	381.555424970294	321.195513574241	367.194074185653
FBgn0031913	1618.30530661238	0.154672853309296	0.116191975497477	1.33118360925583	0.183128603275976	1	1810.04540681481	1968.31654110917	1883.2127151431	2033.60923308636	2039.89452583188	2229.07077550125
FBgn0030137	74.2654602522192	-0.410491359572142	0.308414007185417	-1.33097508546477	0.183197208979624	1	29.081706407693	21.6549011471188	36.0556189939033	22.3250514610279	29.0894050029501	13.5163462890425
FBgn0034407	3712.99647189053	1.09138235771287	0.820326364449789	1.33042457856987	0.183378420889	1	699.12422204094	854.798729491533	3043.92629583145	1736.28013862812	4582.79334650643	3477.08008285617
FBgn0034118	339.791768639011	-0.194570981484545	0.146285836423575	-1.33007395822764	0.183493904784262	1	158.20448285785	119.671822128815	141.448966822236	115.684357570781	121.205854178959	129.531651936657
FBgn0039710	301.551814175772	-0.191128778338324	0.143799405061537	-1.329134694657	0.183803535694457	1	144.245263782157	158.422697865764	160.863530895876	143.08328436386	139.386732305803	122.773478792136
FBgn0033464	198.863687650135	-0.317511577366265	0.238911919951829	-1.32899010409478	0.183851234733731	1	414.123499245548	417.141779991868	391.064790626182	329.801896583366	338.164333159295	313.128689029483
FBgn0005671	2643.97125941293	0.150224999600309	0.113073123409822	1.32856504773317	0.183991509835295	1	2006.63774213082	2053.79641405832	1876.27894225966	2201.04711904406	2237.46006814358	2151.35178433926
FBgn0032247	73.5037173584886	0.271065137693311	0.204063694343533	1.32833593239268	0.18406715426793	1	54.6736080464629	56.9865819661022	47.149655607412	59.8717289182111	65.4511612566377	67.5817314452123
FBgn0034530	29.8588930691208	-0.326164051195422	0.24586877725951	-1.32657775757823	0.184648397562469	1	51.1838032775397	53.5673870481361	48.5364101841006	41.6057777228246	49.6944002133731	31.538141341099
FBgn0039687	105.649996884453	-0.52160315341843	0.393296270846834	-1.32623467874569	0.184761975829487	1	11.6326825630772	14.8165113111866	22.1880732270174	12.1773007969243	9.6964683343167	11.2636219075354
FBgn0035179	58.759272051964	-0.254150814892304	0.191872455285228	-1.32458207466254	0.185309804507088	1	132.61258121908	131.069138522035	112.327120711776	109.595707172319	92.1164491760086	113.762581266107
FBgn0034627	42.5161521492472	0.365485507410204	0.276008927454712	1.32418002120665	0.185443264416274	1	22.1020968698467	29.6330226223731	18.0278094969517	35.5171273243625	26.6652879193709	28.1590547688384
FBgn0259728	49.7758485708457	-0.338132833994735	0.255352899029713	-1.32417855947423	0.185443749761696	1	47.6939985086165	39.8906073762715	47.149655607412	23.3398265274382	44.8461660462147	39.4226766763738
FBgn0026787	240.051304870634	0.166335764839177	0.125648247801588	1.32382080728924	0.185562564041085	1	188.449457521851	208.570889995934	180.278094969517	199.91068808284	220.594654605705	229.777886913722
FBgn0033368	150.292730659481	0.2965354504551	0.224214272032738	1.32255385781955	0.185983787568487	1	403.654084938779	382.949830812207	274.577406184341	422.146427626709	446.037543378568	437.028530012373
FBgn0288229	2715.65424443709	0.188191928233004	0.142417867652832	1.32140672609812	0.186365784544612	1	4383.19478976749	4280.8320372936	4197.70610363636	5004.87062753588	4965.80384571194	4683.41398915321
FBgn0032882	277.785187958394	-0.188072696159936	0.142331960222777	-1.32136658460662	0.186379162226679	1	237.306724286775	222.247669667799	210.786695656665	187.733387285916	206.04995210423	195.987021191116
FBgn0038640	108.600978003898	-0.24708179409519	0.187081058103773	-1.32072052937681	0.186594566287232	1	89.5716557356945	108.274505735594	81.8185200246267	80.1672302464182	76.359688132744	79.9717155435012
FBgn0035375	323.38228601073	0.177787541072166	0.134640620533628	1.3204599055436	0.186681514049438	1	151.224873320004	143.606186554578	133.128439362105	171.49698622335	157.567610432646	155.437982323988
FBgn0031974	107.150709251045	-0.27232239948374	0.206266734550956	-1.32024390688391	0.18675359690818	1	76.7757049163095	88.8990678671194	115.100629865153	67.9899294494939	87.2682150088503	76.5926289712405
FBgn0032283	70.8357146530696	0.361864120404933	0.274190663232337	1.31975362012347	0.18691729121936	1	82.5920461978481	104.855310817628	115.100629865153	127.861658367705	109.085268761063	150.932533560974
FBgn0039303	725.545903517382	0.13238175173118	0.10030892226737	1.31974054489711	0.186921658156101	1	749.144757062172	711.192542936955	646.227632736882	796.59842713213	734.50747632449	779.442636001448
FBgn0027093	518.971271885382	0.182617961843442	0.138478282947508	1.318748022841	0.187253366192172	1	286.163991051699	235.924449339663	252.389332957323	306.462070055928	287.257874404132	284.969634260645
FBgn0034628	455.35720455744	0.166798797941004	0.126535177973864	1.31820099842477	0.187436371393868	1	385.041792837855	373.83197769763	357.782680785656	408.954351763374	407.251670041301	438.154892203126
FBgn0015925	246.615198063502	-0.224427976953338	0.170338797903309	-1.31753880921909	0.187658081221332	1	82.5920461978481	95.7374577030517	84.5920291780039	84.2263305120596	78.7838052163232	61.9499204914446
FBgn0039136	299.779132384777	0.199615460284636	0.151531860292906	1.3173167669082	0.187732467285433	1	246.612870337237	251.880692290172	285.671442797849	282.107468462079	306.650811072766	310.875964647976
FBgn0013308	56.2378374387546	-0.26569706236867	0.20172953558776	-1.31709549419491	0.187806617175887	1	114.000289118157	99.1566526210178	97.0728203682012	83.2115554456493	93.3285077177982	82.2244399250082
FBgn0040392	22.8371103023428	-0.486313560533184	0.369502860710864	-1.31612935173924	0.188130630886856	1	34.8980476892316	20.5151695077968	61.0172013742979	31.4580270587211	29.0894050029501	21.4008816243172
FBgn0000659	60.7491304139109	0.381282240748025	0.289715033192	1.31605956566065	0.188154050899033	1	77.9389731726173	78.641483113221	49.9231647607892	95.3888562425736	100.600858968536	74.3399045897335
FBgn0011474	363.052264734913	0.247546122744184	0.188107146862208	1.31598467614586	0.18817918600285	1	161.694287626773	141.326723275933	138.675457668859	180.629961821044	186.657015435596	157.690706705495
FBgn0259139	434.361146184435	0.235843570194955	0.179226755530441	1.31589488130246	0.18820932703529	1	588.613737691706	494.643531465767	449.308482847103	619.012790510318	601.181036727635	585.70833919184
FBgn0030522	115.516184701675	-0.267370677074183	0.203197441504255	-1.31581714363556	0.188235423765786	1	103.530874811387	79.7812147525431	80.4317654479381	65.9603793166732	77.5717466745336	76.5926289712405
FBgn0051159	80.6966578116083	0.25594527277774	0.194571583694091	1.31542986862944	0.18836547273916	1	57.0001445590783	55.8468503267801	61.0172013742979	62.9160541174421	72.7235125073752	72.0871802082264
FBgn0038290	33.813186686583	0.501305878886955	0.381102422100298	1.31540984736912	0.188372197784524	1	30.2449746640007	22.7946327864409	38.8291281472805	42.620552789235	47.2702831297939	39.4226766763738
FBgn0052551	14.9788858710279	-0.64184082522103	0.487985742815797	-1.3152860194592	0.188413794921131	1	13.9592190756926	10.2575847538984	29.1218461104604	9.13297559769321	14.544702501475	10.1372597167818
FBgn0038530	892.878474926845	1.29674632335917	0.986053048848071	1.31508778850596	0.188480400153181	1	29.081706407693	166.400819341018	298.152233988047	90.3149809105218	463.006362963622	658.921881590819
FBgn0038166	264.769047813227	-0.206921653136801	0.157353398182698	-1.31501229415174	0.188505770681981	1	198.91887182862	227.946327864409	244.068805497192	194.836812750789	170.900254392332	214.008816243172
FBgn0266681	11.5456223448872	0.622505240664278	0.473497127714505	1.31469697328263	0.18861176421139	1	5.8163412815386	10.2575847538984	6.93377288344294	11.1625257305139	14.544702501475	10.1372597167818
FBgn0025388	97.7163921235873	0.413199591119248	0.314428869239757	1.31412739586637	0.188803336202872	1	34.8980476892316	26.213827704407	22.1880732270174	31.4580270587211	39.9979318790564	40.5490388671274
FBgn0030927	42.5920922404161	0.328177593021783	0.249762748671003	1.31395732457313	0.188860565886431	1	55.8368763027706	63.8249718020345	52.6966739141664	73.0638047815457	76.359688132744	67.5817314452123
FBgn0040294	250.877946106605	-0.259850116950855	0.197803445016118	-1.31367841914827	0.188954446386239	1	132.61258121908	135.628065079323	131.741684785416	127.861658367705	101.812917510325	103.625321549325
FBgn0028327	780.247705521705	0.243226081872401	0.18545666091966	1.31149822641187	0.189689492547033	1	899.206362125868	827.445170147804	722.499134454755	1001.58299054702	945.405662595878	952.902413377493
FBgn0266719	342.404256328707	0.236210466240686	0.180203621759884	1.31079755186846	0.189926169885616	1	399.001011913548	340.779760157291	379.970754012673	418.087327361067	424.220489626356	476.451206688746
FBgn0036035	272.460444549305	-0.196224637161289	0.149868769787833	-1.30930972102514	0.190429458089821	1	138.428922500619	112.833432292882	138.675457668859	111.625257305139	121.205854178959	107.004408121586
FBgn0035617	223.854106840568	0.360163840420297	0.27531472482213	1.30818952982985	0.190809032462622	1	190.775994034466	184.636525570171	162.250285472565	197.88113795002	235.13935710718	257.93694168256
FBgn0086908	292.160456196197	0.235209717342288	0.179818228552381	1.30804156639643	0.190859211164743	1	172.163701933543	210.850353274578	201.079413619845	235.427815407203	221.806713147494	229.777886913722
FBgn0030351	35.1060055632153	0.42420475286459	0.324415020644865	1.30759898854672	0.191009360158765	1	22.1020968698467	23.9343644257629	30.5086006871489	36.5319023907729	30.3014635447397	34.9172279133597
FBgn0038666	157.387874806869	-0.203269437433295	0.155572645700321	-1.30658854915184	0.191352487685761	1	138.428922500619	98.0169209816958	120.647648171907	106.551381973087	93.3285077177982	109.257132503093
FBgn0051183	373.756230101519	0.165041710752774	0.126413079850904	1.30557463632268	0.191697250376458	1	720.063050654479	731.707712444752	682.283251730786	754.992649409306	893.287145298926	746.778132469595
FBgn0034986	205.930416737209	-0.303691595767376	0.232613249285528	-1.30556447966814	0.191700706272681	1	105.857411324003	125.370480325425	180.278094969517	106.551381973087	115.145561470011	110.383494693847
FBgn0050414	17.7583508724853	-0.542012998351233	0.415226865956271	-1.30534183307954	0.19177647535973	1	15.1224873320004	21.6549011471188	18.0278094969517	15.2216259961554	12.1205854178959	10.1372597167818
FBgn0085284	56.1523798356388	-0.320706820783939	0.245694173707726	-1.30530901870489	0.191787644315067	1	52.3470715338474	39.8906073762715	67.9509742577408	37.5466774571832	43.6341075044251	46.180849820895
FBgn0041186	347.635595241564	-0.232811393413795	0.17837627665128	-1.30517015930843	0.19183491287315	1	86.0818509667713	92.3182627850856	101.233084098267	70.0194795823146	79.9958637581128	87.8562508787759
FBgn0038199	17.2765515727969	0.623079422698063	0.477738701386102	1.30422639172893	0.192156403955615	1	10.4694143067695	7.97812147525431	9.70728203682012	16.2364010625657	14.544702501475	12.3899840982889
FBgn0031515	180.729559817828	0.19282940047941	0.147868598954661	1.30405915686355	0.192213413212962	1	347.817208636008	344.198955075257	291.218461104604	364.304248841318	346.648742951822	414.501286197302
FBgn0037207	334.666237372837	-0.159045902657028	0.1220432536024	-1.30319290876313	0.192508910486479	1	269.878235463391	270.116398519324	295.378724834669	226.29483980951	264.22876211013	257.93694168256
FBgn0028984	808.156779950696	-0.163840627498553	0.125756554917743	-1.30283966196212	0.192629506942385	1	775.899926957249	838.842486541024	934.672584688109	756.007424475716	759.960705702071	758.041754377131
FBgn0037364	351.58368589181	0.349959108711588	0.268704513847898	1.30239385896467	0.192781780798617	1	31.4082429203084	29.6330226223731	33.2821098405261	26.3841517266693	52.1185172969523	42.8017632486344
FBgn0002524	679.398217816931	-0.116213124258446	0.0892934681322933	-1.3014739676845	0.193096269516985	1	493.225740674473	509.460042776954	459.015764883923	491.151132142613	429.068723793514	428.017632486344
FBgn0002962	2474.60987642291	-1.66627041317209	1.28049631522947	-1.30126919800897	0.193166326605773	1	5.8163412815386	2.27946327864409	2.77350915337718	0	3.63617562536876	0
FBgn0031042	100.346724606625	-0.320953127264351	0.246720746724403	-1.30087611814368	0.193300861880704	1	168.673897164619	161.84189278373	239.908541767126	149.171934762322	141.810849389382	164.448879850016
FBgn0030456	375.806060525187	0.169275169315108	0.130137881670454	1.30073708855782	0.193348462534515	1	168.673897164619	160.702161144408	203.852922773223	191.792487551557	207.262010646019	198.239745572623
FBgn0031878	273.425539515575	1.28214374246997	0.985888234386444	1.30049603773586	0.193431013405195	1	1.16326825630772	2.27946327864409	0	3.04432519923107	4.84823416715835	1.12636219075354
FBgn0260444	252.800113712808	-0.206695687454655	0.158994471044249	-1.30001808300071	0.193594771527326	1	198.91887182862	206.29142671729	248.229069227257	201.940238215661	184.232898352017	177.965226139059
FBgn0264815	1056.01779348499	0.305194394886711	0.23481077783442	1.29974610919233	0.193688001352821	1	3356.02891944777	2647.59659814511	1750.084275781	2964.15796898465	3156.20044282009	3462.43737437637
FBgn0052082	341.963857294208	0.215106442741155	0.165506400855742	1.29968654764383	0.19370842283892	1	817.777584184327	769.31885654238	607.398504589602	800.657527397772	861.773623212397	887.573406313788
FBgn0038324	64.4081410117285	-0.274645212342178	0.211358758479057	-1.29942669193618	0.193797536393592	1	52.3470715338474	66.1044350806785	48.5364101841006	49.7239782541075	47.2702831297939	41.6754010578809
FBgn0031263	1237.23923004198	-0.324715978974128	0.249944438456244	-1.29915264760321	0.193891548326399	1	721.226318910787	724.86932260882	1074.73479693366	724.549397416995	660.571905275325	626.257378058967
FBgn0261850	219.140366881076	-0.211560194375771	0.16293300028766	-1.29844901893576	0.194133084105387	1	108.183947836618	84.3401413098313	84.5920291780039	82.1967803792389	77.5717466745336	79.9717155435012
FBgn0284255	332.165726369789	-0.273103716557267	0.210468700479258	-1.29759777076298	0.194425588593983	1	204.735213110159	233.644986061019	201.079413619845	187.733387285916	180.596722726649	161.069793277756
FBgn0260987	1001.63253132605	0.101818068631785	0.0784758976736928	1.297443822244	0.194478522643689	1	1083.00274662249	1043.99418161899	977.661976565455	1092.91274652395	1107.82150719568	1134.24672608881
FBgn0035165	1115.7504078304	-0.143634062192682	0.110868630127647	-1.29553384061218	0.195136135247533	1	1032.98221160126	964.212966866449	1139.91226203802	955.918112558556	1021.76535072862	860.540713735703
FBgn0085400	149.551303307822	0.288158384998555	0.222469203203421	1.29527314724578	0.195226019109869	1	346.653940379701	328.242712124749	231.588014306994	367.348574040549	334.528157533926	406.616750862027
FBgn0034356	115.94234316427	0.254326121662968	0.196539197339624	1.2940223889461	0.195657687447241	1	87.245119223079	96.8771893423737	104.006593251644	116.699132637191	104.237034593905	121.647116601382
FBgn0034997	902.264548282917	0.184050488050666	0.142388766453869	1.29259135137107	0.196152432414255	1	1292.39103275788	1192.15929473086	1517.10950689732	1396.33049138065	1475.07524535793	1672.647853269
FBgn0037520	34.0950909891287	0.456456418899772	0.353165200230128	1.29247281046473	0.196193455999854	1	24.4286333824621	12.5370480325425	5.54701830675435	24.3546015938486	21.8170537522126	13.5163462890425
FBgn0001206	159.259976431942	0.354092136956874	0.274016412054914	1.29222966719932	0.196277620534259	1	61.6532175843092	68.3838983593226	70.724483411118	73.0638047815457	99.3888004267462	84.4771643065153
FBgn0039411	11.1321498535386	-0.536067488428128	0.415053718460444	-1.29156170535361	0.196508973025228	1	24.4286333824621	13.6767796718645	31.8953552638375	19.2807262617968	19.3929366686334	9.0108975260283
FBgn0037263	36.5529630819883	-0.540666239756518	0.418947671522314	-1.29053406071436	0.196865293687853	1	11.6326825630772	14.8165113111866	13.8675457668859	14.206850929745	7.27235125073752	5.63181095376769
FBgn0038575	415.04605443215	-0.682365191005982	0.528773314217757	-1.29046828321025	0.1968881171696	1	5.8163412815386	7.97812147525431	9.70728203682012	5.07387533205179	7.27235125073752	2.25272438150707
FBgn0033113	42.4843796847932	-0.39468068648102	0.305862066390468	-1.2903878246123	0.196916037332355	1	31.4082429203084	23.9343644257629	24.9615823803946	21.3102763946175	26.6652879193709	13.5163462890425
FBgn0262717	75.3054981698841	-0.519740164430745	0.402923290026246	-1.28992336083846	0.197077268876184	1	120.979898656003	107.134774096272	170.570812932696	97.4184063753943	95.7526248013774	84.4771643065153
FBgn0040373	138.437271543079	0.395172051023585	0.30657684856139	1.28898203787379	0.197404331229257	1	16.2857555883081	25.074096065085	16.6410549202631	21.3102763946175	29.0894050029501	27.0326925780849
FBgn0052528	527.496510731889	-0.128995915083087	0.100077857717034	-1.28895559942758	0.197413522990688	1	438.552132628011	461.591313925428	503.391911337958	433.308953357222	424.220489626356	423.51218372333
FBgn0025111	27.1574307920757	0.385467461150397	0.299144619746686	1.2885655823488	0.197549155250462	1	22.1020968698467	38.7508757369495	23.574827803706	37.5466774571832	35.149697711898	38.2963144856203
FBgn0040837	48.8825095956203	-0.466558740223568	0.362111075570914	-1.28844095554928	0.197592509814378	1	41.8776572270779	36.4714124583054	63.7907105276751	33.4875771915418	31.5135220865293	37.1699522948667
FBgn0027505	289.006212512059	-0.170684846309911	0.132475344928747	-1.28842726472397	0.19759727293641	1	360.613159455393	303.168616059664	309.246270601555	309.506395255159	277.561406069816	277.08509892537
FBgn0015794	452.141514470585	-0.238620904898921	0.185248744653646	-1.28811077961723	0.197707403466308	1	383.878524581548	435.377486221021	506.165420491335	384.599750169525	361.193445453297	376.204971711682
FBgn0035995	535.34066949826	-0.168370689256089	0.130719395507811	-1.28803142488544	0.19773502437763	1	570.001445590783	575.564477857632	614.332277473045	537.830785197489	524.821348594891	502.357537076078
FBgn0036249	154.922607177303	0.248293351412546	0.192957331226696	1.28677853198974	0.198171491640821	1	77.9389731726173	77.501751473899	70.724483411118	101.477506641036	81.2079222999024	85.6035264972688
FBgn0034948	558.504700942952	0.118774321297143	0.0923362482246533	1.28632388234105	0.198330050958626	1	525.79725185109	582.402867693564	513.099193374778	594.658188916469	584.212217142581	583.455614810332
FBgn0042201	406.731541327052	0.13532940364207	0.105227311492142	1.28606729301619	0.198419577573443	1	959.696311453869	996.125452767466	858.401082970236	1065.51381973087	1003.58447260178	1023.86323139497
FBgn0035719	76.4470303579907	0.293489174930706	0.228219447779994	1.28599546526654	0.198444644296206	1	183.79638449662	157.282966226442	146.99598512899	180.629961821044	199.989659395282	218.514265006186
FBgn0026630	1011.18099318496	-0.146495572829412	0.113945550687094	-1.28566294994443	0.198560716937755	1	1357.53405511111	1310.69138522035	1099.69637931405	1151.76970037576	1129.6385609479	1125.23582856278
FBgn0046685	206.212895359563	-0.255595890794666	0.198863854527651	-1.28528078368876	0.198694182759657	1	169.837165420927	172.099477537629	275.964160761029	160.334460492836	183.020839810228	172.333415185291
FBgn0034269	345.314129041065	-0.154952574658673	0.120604397797239	-1.28480036788692	0.198862053787918	1	266.388430694468	296.330226223731	291.218461104604	252.678991536179	237.563474190759	275.958736734617
FBgn0037874	9942.59919128735	-0.164757903338902	0.128252089371087	-1.28464108574629	0.19891773440364	1	7798.55039028696	8308.6436506577	8575.69030224223	7593.5618219487	7315.98535824195	7108.47178584558
FBgn0033374	376.28623404483	-0.277823912010763	0.216284870569199	-1.28452772160906	0.198957370300487	1	65.1430223532323	64.9647034413565	65.1774651043637	53.7830785197489	48.4823416715835	58.5708339191839
FBgn0028940	1064.99873671326	-0.21940688190231	0.170855161959366	-1.28416887957117	0.199082871542871	1	1478.51395376711	1496.46764242984	2057.94379180587	1456.20222029886	1484.77171369224	1379.79368367308
FBgn0037468	1456.51876781955	-0.200595736541529	0.156340295304027	-1.28307123989654	0.199467118650096	1	867.798119205559	857.078192770177	991.529522332341	760.066524741357	832.684218209447	770.43173847542
FBgn0267448	12.7113220189597	0.535097592453775	0.417265824880944	1.28239017083762	0.199705810487734	1	13.9592190756926	7.97812147525431	15.2543003435745	17.2511761289761	14.544702501475	21.4008816243172
FBgn0285944	1289.23110877391	0.355837222690612	0.27750732466024	1.28226245244616	0.199750594716303	1	4777.54272865581	3581.03681074986	1752.85778493438	3998.21376165681	4587.64158067359	4356.76895383468
FBgn0037548	213.541239586216	-0.169348059582074	0.13215031262734	-1.28148058233983	0.200024916001313	1	383.878524581548	384.089562451529	339.754871288704	305.447294989518	316.347279407082	364.941349804146
FBgn0039291	147.918600271751	-0.250073011565742	0.195156686415595	-1.28139607286219	0.200054582850795	1	91.8981922483099	94.5977260637297	133.128439362105	89.3002058441114	93.3285077177982	84.4771643065153
FBgn0034816	16.7517759849285	-1.00336979527788	0.78471568818753	-1.27864118225465	0.20102344081339	1	5.8163412815386	4.55892655728818	2.77350915337718	2.02955013282071	2.42411708357917	2.25272438150707
FBgn0263593	2397.54755325115	-0.162422118755523	0.127034858897635	-1.27856338146054	0.201050851922908	1	4568.15444252042	4107.59282811665	3952.25054356248	3517.2103801783	3667.68914745529	4099.95837434288
FBgn0038084	57.8459171639944	0.403112621623345	0.315470620890008	1.27781351076712	0.201315189395798	1	167.510628908312	158.422697865764	88.7522929080697	196.866362883609	179.384664184859	173.459777376045
FBgn0039406	699.02284857902	0.216099461621742	0.169179311006084	1.27733976652719	0.201482319941415	1	345.490672123393	388.648489008817	388.291281472805	446.501029220557	459.370187338254	397.605853335999
FBgn0010774	1128.87397545854	-0.131387032662883	0.102882662493505	-1.27705708113043	0.201582095709551	1	656.083296557554	629.131864905768	669.802460540588	635.249191572884	630.270441730586	518.126607746627
FBgn0040375	208.598224402767	-0.185839562363931	0.14553969254716	-1.2768995118202	0.201637726525399	1	200.082140084928	172.099477537629	205.239677349911	184.689062086685	157.567610432646	163.322517659263
FBgn0033945	239.280506024612	-0.392848695895288	0.307677479963765	-1.27681979175581	0.201665876449698	1	147.73506855108	180.077599012883	299.538988564735	177.585636621812	166.052020225173	132.910738508917
FBgn0037156	140.773754051618	-0.252744005290217	0.198035119447066	-1.27625850402648	0.201864153682716	1	54.6736080464629	80.9209463918651	65.1774651043637	58.8569538518007	53.3305758387418	56.3181095376769
FBgn0038810	279.257076629896	0.202969519576144	0.159110086011113	1.27565464053591	0.202077629644066	1	219.857700442159	194.89411032407	219.107223116797	235.427815407203	267.864937735499	226.398800341461
FBgn0035711	23.5032278802124	0.435770160052815	0.341824795413029	1.27483484492771	0.202367704536338	1	16.2857555883081	23.9343644257629	15.2543003435745	25.3693766602589	27.8773464611605	22.5272438150708
FBgn0036302	445.012958183657	-0.122943860954442	0.0964400174199671	-1.27482205254131	0.202372233372741	1	537.429934414167	506.040847858987	533.900512025107	463.752205349533	459.370187338254	524.884780891148
FBgn0033928	119.875315871207	-0.460320424897874	0.361103905255538	-1.27475892173507	0.202394584396321	1	77.9389731726173	69.5236299986447	165.023794625942	76.1081299807768	82.4199808416919	67.5817314452123
FBgn0052296	400.346620852342	0.237630232177833	0.186517184889966	1.27403934558641	0.202649472449375	1	657.246564813862	585.822062611531	549.154812368681	696.135695557505	662.996022358904	754.66266780487
FBgn0030616	8961.91091152262	-0.185983212646275	0.146020711429191	-1.27367693819559	0.202777932804459	1	8158.00028148604	8385.00567049228	7814.3620396402	7232.30189830661	7261.44272386142	6918.11657560823
FBgn0041711	47.9997574496713	0.326218261516177	0.256144261304183	1.27357239961265	0.202814998984589	1	68.6328271221555	100.29638426034	101.233084098267	111.625257305139	112.721444386432	113.762581266107
FBgn0034433	273.227957513017	0.228065495161226	0.179219374312984	1.27254933254559	0.203178007761596	1	367.59276899324	347.618149993223	299.538988564735	402.865701364912	409.675787124881	377.331333902435
FBgn0052111	12.0435868513644	0.856357983887162	0.672950237355104	1.27254280680977	0.203180324767084	1	31.4082429203084	14.8165113111866	15.2543003435745	28.41370185949	47.2702831297939	36.0435901041132
FBgn0265177	234.381733912393	-0.238879045218278	0.187838892932365	-1.27172302545613	0.203471546588387	1	173.32697018985	157.282966226442	219.107223116797	172.511761289761	151.507317723698	139.668911653439
FBgn0032943	449.763638801031	0.153647386556573	0.120862329301198	1.27125951853594	0.20363633873144	1	519.980910569551	551.630113431869	518.646211681532	610.894589979035	615.72573922911	542.906575943205
FBgn0035955	163.906253125213	-1.98900264819965	1.56490212364283	-1.27100769955478	0.203725909482141	1	1.16326825630772	0	1.38675457668859	0	0	0
FBgn0003358	524.979746305414	-1.98903266664917	1.5651213087807	-1.27084888276086	0.203782414564409	1	1.16326825630772	0	1.38675457668859	0	0	0
FBgn0266801	547.775437804204	0.334854720231274	0.263500656350511	1.27079273679625	0.203802393344058	1	1819.35155286527	1417.82615931662	861.174592123613	1452.14312003322	1835.05663226944	1884.40394513067
FBgn0015221	3849.65071224479	-0.176843577364983	0.139161668740229	-1.27077793020069	0.20380766230771	1	3352.53911467885	3380.44404222918	4138.07565683875	3164.06865706749	3237.40836511999	3213.51133021984
FBgn0026077	64.8367226457951	0.293011952137935	0.230614969921589	1.27056778767468	0.203882452734079	1	72.1226318910787	110.553969014238	120.647648171907	123.802558102064	127.266146887907	119.394392219875
FBgn0031753	27.6646254360415	-0.414552198521517	0.326276303988387	-1.27055564089102	0.203886776425477	1	66.3062906095401	76.3620198345769	41.6026373006577	45.6648779884661	46.0582245880043	47.3072120116486
FBgn0035661	379.580646419311	-1.98912179476267	1.56613828604011	-1.27008056216546	0.20405593475576	1	1.16326825630772	0	1.38675457668859	0	0	0
FBgn0031654	586.719333171924	-1.98776355211791	1.56546872527237	-1.26975615675239	0.204171502436489	1	2.32653651261544	0	0	0	0	0
FBgn0034398	2964.73663097695	-0.203325524366455	0.160166214663186	-1.26946575339892	0.204274997456067	1	3148.967169825	3386.14270042579	4161.65048464245	3209.73353505596	3072.5684034366	3006.26068712119
FBgn0287724	274.964938640987	0.346074117804222	0.272636684755722	1.26936005737562	0.204312675267129	1	809.634706390173	729.428249166108	471.49655607412	817.908703526748	946.617721137668	792.95898229049
FBgn0262169	564.309376578898	0.120269011643054	0.0947643540846001	1.26913767106654	0.204391966558953	1	635.144467944015	580.12340441492	703.084570381114	692.076595291864	666.632197984273	721.998164273018
FBgn0047199	71.5513190547278	-1.98765868639404	1.56650118615775	-1.26885233407917	0.204493735543246	1	2.32653651261544	0	0	0	0	0
FBgn0065099	58853.4363549064	-0.261005529428943	0.205707050544764	-1.26882150484261	0.204504733379638	1	56665.1233012617	63734.933002528	68190.882799508	55303.2115692316	53381.482297497	48694.8902306569
FBgn0027082	79.4519516314861	-0.320213224824673	0.252509997318369	-1.2681209782793	0.204754750975802	1	58.163412815386	69.5236299986447	54.083428490855	70.0194795823146	32.7255806283189	41.6754010578809
FBgn0260780	971.970977108642	0.566901210820525	0.447069415655336	1.26803845436292	0.204784218350558	1	13.9592190756926	10.2575847538984	9.70728203682012	10.1477506641036	20.604995210423	20.2745194335637
FBgn0034052	91.6689655258911	-1.98910755743044	1.56882475428578	-1.2678965907419	0.204834881763378	1	0	1.13973163932204	1.38675457668859	0	0	0
FBgn0030769	73.8228662568006	-0.353803370034365	0.279051512565361	-1.26787834540583	0.204841398337661	1	114.000289118157	101.436115899662	140.062212245547	100.462731574625	98.1767418849566	78.8453533527476
FBgn0038475	255.649484804279	0.177922513789842	0.14033626866601	1.26782987378184	0.204858711381217	1	374.572378531086	377.251172615597	253.776087534012	361.259923642087	392.706967539826	388.59495580997
FBgn0050085	478.732610610782	0.424978679171448	0.335264341739366	1.26759284022464	0.204943390101105	1	36.0613159455393	36.4714124583054	24.9615823803946	37.5466774571832	44.8461660462147	49.5599363931557
FBgn0035199	13.6286360762946	0.432276205259834	0.341036849583085	1.26753518216078	0.204963991922711	1	24.4286333824621	14.8165113111866	23.574827803706	29.4284769259004	23.0291122940022	31.538141341099
FBgn0033635	831.575770579464	0.217244814290746	0.171436604538722	1.26720203585039	0.205083058024803	1	84.9185827104636	76.3620198345769	131.741684785416	110.610482238729	96.964683343167	128.405289745903
FBgn0000411	55.2358652387917	-0.311587187820544	0.245934796891021	-1.2669503940047	0.205173027856524	1	122.143166912311	147.025381472544	130.354930208727	100.462731574625	110.297327302852	111.5098568846
FBgn0025595	370.701610362882	0.171313376154052	0.135222277231182	1.26690201985851	0.205190326414462	1	685.165002965247	727.148785887464	628.199823239931	825.01212899162	752.688354451334	720.871802082264
FBgn0261987	2085.42758169934	-1.71561177571111	1.35450834570212	-1.26659372838475	0.205300596120761	1	4.65307302523088	5.69865819661022	0	3.04432519923107	0	0
FBgn0003545	290.49723049828	1.75836542296932	1.3883331443454	1.26652988883182	0.205323435636679	1	0	1.13973163932204	0	0	4.84823416715835	0
FBgn0028525	79.6738665764593	-1.13720838948791	0.898834630492724	-1.26520313182027	0.205798520091101	1	1.16326825630772	2.27946327864409	6.93377288344294	1.01477506641036	3.63617562536876	0
FBgn0034139	51.6024621062235	0.233981816664247	0.185096255374296	1.26410886158175	0.206190956399904	1	70.9593636347709	76.3620198345769	85.9787837546925	90.3149809105218	84.8440979252711	97.9935105955578
FBgn0263330	55.4164000630022	-0.310804506309981	0.245895037023637	-1.26397226260449	0.206239982795393	1	96.5512652735408	92.3182627850856	80.4317654479381	63.9308291838525	75.1476295909544	78.8453533527476
FBgn0052473	885.555849621377	0.172017078928729	0.136151312140999	1.26342578873267	0.206436201040952	1	400.164280169856	382.949830812207	384.131017742739	430.264628157991	404.827552957722	479.830293261007
FBgn0030863	337.081394200991	0.181880510693063	0.144037451504321	1.26273069117448	0.206685980295606	1	271.041503719699	249.601229011528	282.897933644472	301.388194723876	319.983455032451	289.475083023659
FBgn0039475	297.830944671519	-1.9900752213122	1.57662811195106	-1.26223502310225	0.20686422969051	1	1.16326825630772	0	1.38675457668859	0	0	0
FBgn0034723	455.137360215252	0.173756395939261	0.137685088075663	1.26198412891144	0.206954497386703	1	623.511785380938	625.712669987802	560.24884898219	658.589018100322	664.208080900694	719.745439891511
FBgn0083123	87.7477084084916	0.240207552604017	0.190342841147677	1.26197313834174	0.206958452270489	1	86.0818509667713	79.7812147525431	76.2715017178724	79.1524551800078	121.205854178959	87.8562508787759
FBgn0011802	352.099227391101	0.242634751969238	0.192302362717885	1.2617356778148	0.207043914266195	1	108.183947836618	107.134774096272	101.233084098267	113.65480743796	136.962615222223	125.026203173643
FBgn0035666	136.577755197788	-1.98692372926757	1.57507336125552	-1.26148011777925	0.207135918883134	1	2.32653651261544	0	0	0	0	0
FBgn0003450	38.026072820684	-1.98622729078471	1.57480503815005	-1.26125281712202	0.207217774717979	1	0	2.27946327864409	0	0	0	0
FBgn0031229	402.844236005015	0.183352064487696	0.14540457881005	1.26097861558554	0.207316551798055	1	202.408676597543	189.195452127459	192.758886159714	216.147089145406	210.898186271388	236.536060058243
FBgn0030001	14.2901307846261	-0.46775003473642	0.371028894090093	-1.26068358067779	0.207422871945497	1	37.2245842018471	26.213827704407	20.8013186503288	17.2511761289761	20.604995210423	23.6536060058243
FBgn0262536	337.053727218611	-1.98608707400324	1.57598082368412	-1.26022286829634	0.207588975502942	1	0	2.27946327864409	0	0	0	0
FBgn0036316	2461.87879337765	-0.164101518419507	0.130240325477425	-1.25999008231863	0.207672939992404	1	3479.33535461639	2957.6036040407	3000.93690395411	2514.61261456486	2921.06108571291	2989.36525425989
FBgn0034534	328.636510929134	-0.196664847090682	0.156128638146386	-1.2596333986228	0.207801641422027	1	293.143600589545	377.251172615597	377.197244859296	270.944942731565	321.195513574241	322.139586555512
FBgn0051636	48.8541503671736	0.294457602081799	0.233773216673581	1.25958656116261	0.207818545980384	1	53.5103397901551	71.8030932772888	47.149655607412	59.8717289182111	64.2391027148481	88.9826130695295
FBgn0000157	129.223931682487	0.182320995091328	0.144755548800959	1.25950954282258	0.207846345578813	1	326.878380022469	316.845395731528	270.417142454275	338.934872181059	347.860801493612	352.551365705857
FBgn0261988	910.547459703276	0.266589422275403	0.211761014344868	1.25891643983743	0.208060515136973	1	1995.00505956774	1540.9171763634	1343.76518481124	1781.94501661659	2008.38100374535	2081.51732851254
FBgn0034046	202.215627703684	0.259336590532725	0.206038364021113	1.25868107992815	0.208145547962203	1	257.082284644006	245.042302454239	201.079413619845	241.516465805665	313.923162323503	288.348720832906
FBgn0001235	1166.34546847208	0.31603145610193	0.251140103309121	1.25838705940539	0.208251809587612	1	3221.08980171608	3040.80401371121	2048.23650976905	3393.40782207623	3689.5062012075	3264.19762880375
FBgn0029769	633.055375581188	0.141515912627915	0.112479954104761	1.25814340656746	0.208339897680326	1	1098.12523395449	1093.00264210984	1058.09374201339	1218.74485475884	1093.27680469421	1271.66291336074
FBgn0027780	181.096473882436	0.18356332524618	0.145963358385701	1.25759866912025	0.208536934933049	1	179.143311471389	140.186991636611	130.354930208727	173.526536356171	145.44702501475	192.607934618855
FBgn0004429	69.953663740595	1.61147507338158	1.28155045839164	1.25744176737605	0.208593712986863	1	0	17.0959745898307	4.16026373006577	12.1773007969243	35.149697711898	18.0217950520566
FBgn0040252	23.1221862989037	-1.12926836777132	0.900585670550147	-1.25392664429302	0.20986866950302	1	4.65307302523088	4.55892655728818	0	1.01477506641036	2.42411708357917	1.12636219075354
FBgn0038418	82.0698845269158	-0.444054966151941	0.354226017132837	-1.25359218316654	0.209990273881394	1	61.6532175843092	23.9343644257629	37.4423735705919	24.3546015938486	31.5135220865293	34.9172279133597
FBgn0263260	365.092520554126	-0.211582679519084	0.168916627258802	-1.25258645612733	0.210356246394922	1	260.572089412929	247.321765732884	339.754871288704	222.235739543868	242.411708357917	265.821477017835
FBgn0086687	25512.1537078155	-0.217472032246073	0.173676785196455	-1.25216523325256	0.210509661616303	1	54246.6885963979	54487.150481069	36241.4441071796	43306.5407341284	41394.223319198	39990.3632205136
FBgn0026432	202.201192532819	0.244353832809223	0.195217691225394	1.25169922498007	0.210679482606842	1	167.510628908312	141.326723275933	146.99598512899	190.777712485147	173.324371475911	175.712501757552
FBgn0011760	1896.08684445798	0.134930897695734	0.107902542606351	1.25048858383243	0.211121123050611	1	1785.61677343235	1881.69693652069	1669.65251033306	2064.05248507867	1896.8716179007	1900.17301580122
FBgn0029778	129.41771938307	-0.20752044561616	0.165987605038926	-1.25021651807973	0.21122046437815	1	102.367606555079	104.855310817628	106.780102405021	83.2115554456493	95.7526248013774	93.4880618325436
FBgn0031988	497.247155815787	0.198877787531178	0.159102831593932	1.2499952737407	0.211301273832687	1	291.980332333238	298.609689502375	260.709860417455	339.94964724747	346.648742951822	291.727807405166
FBgn0051637	692.859129304011	0.113627511550984	0.0909229090149445	1.24971267177898	0.21140452665689	1	1133.02328164372	1094.14237374916	985.982504025587	1151.76970037576	1102.97327302852	1224.3557013491
FBgn0052698	439.327295095287	0.285226540101388	0.228442082654062	1.24857266571727	0.211821415170632	1	1123.71713559326	955.095113751873	618.49254120311	1113.20824785216	1064.18739969126	1111.71948227374
FBgn0014184	9604.12116746314	-0.152073864057193	0.121809660281017	-1.2484548738282	0.211864524297998	1	10871.905123452	11494.1935825628	12312.993886418	10547.5720402693	10464.9134498113	10195.830550701
FBgn0001941	1007.0499511007	-0.16969917410598	0.13596366628441	-1.24812149262732	0.211986568530242	1	480.429789855088	504.901116219665	538.060775755172	464.766980415944	439.97725066962	448.292151919908
FBgn0038316	250.86450264416	0.185780402472062	0.149065967340392	1.24629656109119	0.212655539922298	1	195.429067059697	192.614647045425	171.957567509385	230.353940075151	216.958478980336	190.355210237348
FBgn0264676	8.61839094917283	1.7589120576578	1.41273587756705	1.24503956159655	0.213117208389814	1	0	1.13973163932204	0	1.01477506641036	2.42411708357917	1.12636219075354
FBgn0030367	158.421662212892	-0.234631763444763	0.188537754308258	-1.24448158569419	0.213322372457116	1	225.674041723698	254.160155568816	332.821098405261	265.871067399514	201.201717937072	220.766989387693
FBgn0032869	17.9459363932222	1.75170106465203	1.40769176747979	1.24437828303004	0.213360371800607	1	0	0	1.38675457668859	3.04432519923107	1.21205854178959	0
FBgn0039756	346.350354597635	-0.191027535638172	0.153605672327236	-1.24362292579413	0.213638374467274	1	196.592335316005	232.505254421697	239.908541767126	188.748162352326	193.929366686334	202.745194335637
FBgn0038491	187.84023401946	-0.218434226733857	0.175661982626846	-1.24349175312379	0.213686678051669	1	108.183947836618	140.186991636611	130.354930208727	107.566157039498	126.054088346117	92.3616996417901
FBgn0000014	14.5581249534293	-1.98364123339123	1.59536961315511	-1.24337408524928	0.213730015276804	1	0	2.27946327864409	0	0	0	0
FBgn0025640	244.922347622142	-0.189565808603762	0.15251012511809	-1.24297195649784	0.213878167663766	1	247.776138593544	248.461497372206	259.323105840766	222.235739543868	213.322303354967	226.398800341461
FBgn0032726	2232.77263175823	-0.220146043901926	0.177114818858367	-1.24295666122646	0.213883804214074	1	4757.76716829858	4915.66256039598	3235.29842741448	3962.69663433244	3197.41043324093	3923.11951039457
FBgn0010287	69.0600670615998	-0.365605452865147	0.294231870397209	-1.24257597374338	0.214024128121513	1	30.2449746640007	21.6549011471188	44.3761464540348	24.3546015938486	31.5135220865293	18.0217950520566
FBgn0030054	187.543216253303	0.506772313594128	0.407844840757474	1.24256154044494	0.21402944963641	1	24.4286333824621	20.5151695077968	22.1880732270174	32.4728021251314	27.8773464611605	34.9172279133597
FBgn0032160	516.959200003494	-0.16553123247774	0.133253760336879	-1.24222560068295	0.214153336606942	1	431.572523090164	462.73104556475	410.479354699822	405.910026564143	358.769328369718	398.732215526752
FBgn0024366	12.1038149952466	-0.549084026166518	0.442049039639401	-1.24213373840701	0.214187222335407	1	17.4490238446158	18.2357062291527	19.4145640736402	13.1920758633346	6.06029270894794	18.0217950520566
FBgn0037669	129.451895887817	-0.300246122712563	0.241775250915121	-1.24183977299632	0.214295684913199	1	45.3674619960011	35.3316808189834	42.9893918773463	32.4728021251314	39.9979318790564	28.1590547688384
FBgn0010044	25.624074050323	-0.387226968850841	0.311953520176064	-1.24129700037459	0.214496052399558	1	37.2245842018471	30.7727542616952	18.0278094969517	22.3250514610279	21.8170537522126	22.5272438150708
FBgn0041579	5208.79210544394	0.824380229753719	0.664180357705842	1.24119935223804	0.214532114075896	1	2314.90383005236	2134.71736045019	6614.81933080457	3424.86584913496	9403.15016720362	6763.80495547499
FBgn0035112	63.3859651650033	0.334606965887345	0.269658800788164	1.24085312591078	0.214660011462243	1	69.7960953784632	91.1785311457635	70.724483411118	82.1967803792389	99.3888004267462	111.5098568846
FBgn0051106	128.263900800435	0.858434444983013	0.691995406475297	1.2405204383588	0.214782959347849	1	1.16326825630772	3.41919491796613	4.16026373006577	8.11820053128286	1.21205854178959	5.63181095376769
FBgn0016974	12.167718775872	1.75584379249823	1.41553366120144	1.24041118952124	0.214823344375906	1	0	1.13973163932204	0	2.02955013282071	2.42411708357917	0
FBgn0033401	236.864345521298	0.203972356122388	0.16455480161522	1.2395405914641	0.215145366083227	1	161.694287626773	180.077599012883	209.399941079977	212.087988879765	199.989659395282	220.766989387693
FBgn0039175	381.595301356387	0.202929939280493	0.16373753655127	1.23936113584408	0.215211787354886	1	164.020824139389	147.025381472544	176.117831239451	197.88113795002	187.869073977386	173.459777376045
FBgn0051104	127.480886010791	-0.68200320026505	0.550717877667087	-1.23838943299627	0.215571696897305	1	3.48980476892316	9.11785311457635	11.0940366135087	2.02955013282071	6.06029270894794	6.75817314452123
FBgn0040238	621.176117718074	0.11520766878925	0.0930330605635328	1.23835191588235	0.215585601569093	1	625.838321893553	661.044350806785	630.973332393308	676.854969295708	732.083359240911	670.185503498355
FBgn0036732	528.476557791595	0.210280595444512	0.169921200431598	1.23751830207415	0.215894723943187	1	1126.04367210587	1074.76693588069	805.70440905607	1111.17869771934	1179.33296116127	1190.56483562649
FBgn0034802	1636.43927589786	0.181892699640175	0.147189935864642	1.23576859091403	0.216544593206912	1	1219.10513261049	1143.15083424001	1131.59173457789	1296.88253487244	1369.62615222223	1297.56924374808
FBgn0038053	553.742690800085	-0.170824717648148	0.138253349190973	-1.23559189450219	0.216610299117813	1	877.104265256021	838.842486541024	700.311061227737	762.096074874178	686.025134652906	699.470920457947
FBgn0035251	424.099515593144	-0.16080736347552	0.13014968902085	-1.23555703194771	0.216623264719623	1	415.286767501856	369.273051140342	420.186636736642	355.171273243625	363.617562536876	358.183176659625
FBgn0037831	166.05815440383	0.241071762730878	0.1951401217722	1.23537774057709	0.216689953122516	1	197.755603572312	210.850353274578	183.051604122894	211.073213813354	229.079064398232	260.189666064067
FBgn0035473	365.233291915642	0.128576155795644	0.104103334820799	1.2350820078624	0.216799984798038	1	268.714967207083	276.954788355257	273.190651607652	282.107468462079	310.286986698134	304.117791503455
FBgn0033062	756.725276335036	0.191828605434883	0.155373850890218	1.2346260605359	0.216969705422518	1	660.736369582785	634.830523102378	618.49254120311	746.874448878023	700.569837154382	738.893597134321
FBgn0051108	299.80067512783	0.172669643737861	0.13990979256242	1.23414980878358	0.217147086158219	1	230.327114748929	217.68874311051	183.051604122894	218.176639278227	249.684059608655	246.673319775025
FBgn0038039	319.462507601636	0.155872769604451	0.126324981781632	1.23390296524163	0.2172390644683	1	262.898625925545	251.880692290172	224.654241423551	277.033593130027	267.864937735499	280.464185497631
FBgn0039328	70.850920479906	0.240213896205773	0.194785413127671	1.23322322934072	0.217492491019355	1	83.7553144541559	83.2004096705092	109.553611558399	116.699132637191	99.3888004267462	108.13077031234
FBgn0004363	5988.13478548172	-0.104675636834764	0.084911313245612	-1.23276431412599	0.217663708969468	1	4523.95024878072	4764.07825236614	4676.13643259392	4452.83299140865	4249.47724751429	4283.5554114357
FBgn0001301	417.524084400666	-0.234027606917826	0.189891454053744	-1.23242832640373	0.217789124996064	1	561.858567796629	556.189039989157	522.806475411598	458.678330017481	475.126948381518	461.80849820895
FBgn0046302	715.031024900877	-0.4101197690812	0.332795000883277	-1.23234954849891	0.217818538384592	1	19.7755603572312	21.6549011471188	23.574827803706	19.2807262617968	7.27235125073752	21.4008816243172
FBgn0030669	178.9267403477	-0.223967009370818	0.181814932520478	-1.23184056593147	0.218008646569668	1	155.877946345235	223.387401307121	181.664849546205	161.349235559247	146.65908355654	172.333415185291
FBgn0263397	589.584324029398	0.246880288228211	0.200498307144139	1.2313335296678	0.218198146347428	1	1649.51438744435	1375.65608866171	951.313639608372	1500.85232322092	1647.18755829205	1573.52798048269
FBgn0015818	62.3580334748385	0.411085579053422	0.333934369850399	1.23103704251104	0.218309010316537	1	24.4286333824621	22.7946327864409	18.0278094969517	34.5023522579521	21.8170537522126	30.4117791503455
FBgn0031289	17.4283288320963	-0.459389516291925	0.373278624686562	-1.23068797919428	0.21843958570101	1	31.4082429203084	47.8687288515258	22.1880732270174	25.3693766602589	24.2411708357917	24.7799681965778
FBgn0034724	473.377241428473	0.175035621215702	0.142244016236032	1.23053064619082	0.21849845817271	1	621.185248868323	607.476963758649	612.945522896356	705.268671155198	659.359846733536	714.113628937743
FBgn0034475	83.7013743009206	-0.248223163323621	0.201882281587038	-1.22954407574695	0.218867883062426	1	179.143311471389	166.400819341018	167.797303779319	159.319685426426	143.022907931171	129.531651936657
FBgn0038055	253.378641181002	-0.177053027905677	0.144057346905944	-1.22904545799581	0.219054762859382	1	191.939262290774	257.579350486782	196.91914988978	198.89591301643	191.505249602755	182.470674902073
FBgn0000045	169.058746865489	-0.269980150108334	0.219680784598627	-1.2289657040401	0.219084664927032	1	133.775849475388	137.907528357967	167.797303779319	141.05373423104	111.509385844642	110.383494693847
FBgn0035078	13.0699979748394	-0.675775346628093	0.550042130662515	-1.22858833706817	0.21922619047922	1	17.4490238446158	20.5151695077968	30.5086006871489	12.1773007969243	19.3929366686334	11.2636219075354
FBgn0013949	388.470530505949	0.259108100146082	0.210950479326833	1.22828874801766	0.219338593377979	1	458.327692985242	524.27655408814	589.37069509265	609.879814912625	636.330734439533	634.141913394242
FBgn0035392	177.059165973774	-0.157806579078867	0.128531336384799	-1.2277673563311	0.219534313122594	1	216.367895673236	248.461497372206	228.814505153617	188.748162352326	221.806713147494	212.882454052419
FBgn0039152	71.4282545888135	0.38045864730279	0.30991708794281	1.22761429461094	0.219591793148168	1	174.490238446158	194.89411032407	98.4595749448898	208.028888614123	214.534361896757	188.102485855841
FBgn0027083	129.487209688098	0.221754457654312	0.180675741249669	1.22736154904093	0.219686731588038	1	111.673752605541	95.7374577030517	92.9125566381354	107.566157039498	118.78173709538	125.026203173643
FBgn0032455	636.445048237136	0.141779664445918	0.115520795043182	1.22730859316645	0.219706627056072	1	583.960664666476	639.389449659667	542.221039485238	657.574243033911	621.786031938058	670.185503498355
FBgn0027553	238.842371634281	0.202107285239804	0.164974223197134	1.22508402417691	0.220543563823334	1	130.286044706465	117.392358850171	94.299311214824	145.112834496681	115.145561470011	134.037100699671
FBgn0030365	249.666939357978	-0.187191254704456	0.152808215935647	-1.22500778873885	0.220572285908132	1	155.877946345235	127.649943604069	158.090021742499	109.595707172319	128.478205429696	149.80617137022
FBgn0035026	269.090349566847	0.296027123185394	0.241772345038169	1.22440440050602	0.220799710102415	1	207.061749622774	237.064180978985	185.825113276271	248.619891270537	267.864937735499	257.93694168256
FBgn0028997	103.84562299339	-0.59692163370177	0.487831650357165	-1.22362219274771	0.221094783687365	1	8.14287779415404	6.83838983593226	12.4807911901973	8.11820053128286	6.06029270894794	3.37908657226061
FBgn0000455	578.792093840541	-0.157737733626362	0.128963056671931	-1.22312340988963	0.22128308793513	1	487.409399392935	529.97521228475	550.54156694537	469.840855747995	438.765192127831	495.599363931557
FBgn0263745	81.5669196090125	0.29674546990704	0.242653936890494	1.22291636274155	0.221361287678272	1	55.8368763027706	50.1481921301699	48.5364101841006	65.9603793166732	67.8752783402169	56.3181095376769
FBgn0030092	77.8471085637887	-0.332217024624795	0.271767715204189	-1.22243006081568	0.221545037182219	1	50.020535021232	41.0303390155936	52.6966739141664	30.4432519923107	37.5738147954772	46.180849820895
FBgn0031848	102.047486265894	-0.648381853907395	0.530480747705975	-1.22225331779009	0.22161184672258	1	10.4694143067695	6.83838983593226	6.93377288344294	6.08865039846214	6.06029270894794	3.37908657226061
FBgn0015903	397.771338714348	0.248356849145954	0.203219893889881	1.22210894018344	0.221666432721922	1	193.102530547082	188.055720488137	138.675457668859	168.452661024119	204.83789356244	246.673319775025
FBgn0034871	426.93610869064	0.60403532872938	0.494338847336383	1.22190544397647	0.221743386520647	1	181.469847984004	206.29142671729	323.113816368441	212.087988879765	164.839961683384	702.850007030207
FBgn0051866	21.3302216275407	-0.47971623381549	0.393027832004446	-1.22056555478255	0.222250554774442	1	23.2653651261544	15.9562429505086	23.574827803706	9.13297559769321	18.1808781268438	18.0217950520566
FBgn0083950	667.898327323963	0.351693310350168	0.288169945605334	1.22043716117375	0.222299197266913	1	2186.94432185851	1846.36525570171	1059.48049659008	2037.668333352	2219.27919001673	2243.71348398105
FBgn0054003	84.4526278807412	-0.416759716249319	0.341522312116692	-1.22030011353085	0.22235112678958	1	79.102241428925	82.0606780311872	113.713875288464	79.1524551800078	60.6029270894794	65.3290070637052
FBgn0028539	904.951391408417	-0.116478153236231	0.0954702960855332	-1.22004600396207	0.222447435912547	1	1081.83947836618	980.169209816958	1006.78382267592	989.405689750098	985.403594474935	856.035264972689
FBgn0030588	83.6234331893909	0.279343968249577	0.229147804908248	1.21905583324888	0.222823001758622	1	174.490238446158	208.570889995934	123.421157325284	234.413040340792	189.081132519176	192.607934618855
FBgn0015038	135.762181048343	-0.24925905108604	0.204529633506289	-1.21869406800837	0.222960330286921	1	200.082140084928	226.806596225087	277.350915337718	216.147089145406	185.444956893807	189.228848046594
FBgn0039450	337.109895586407	0.141144470450965	0.115872419257974	1.21810238670107	0.223185067031228	1	261.735357669237	239.343644257629	217.720468540108	268.915392598745	267.864937735499	257.93694168256
FBgn0037329	287.923049175593	-0.155423896886878	0.127598629665809	-1.21806869943624	0.223197867250738	1	255.919016387698	281.513714912545	257.936351264077	234.413040340792	254.532293775813	226.398800341461
FBgn0020272	175.297571156906	-0.250892290094809	0.206007058731223	-1.21788200676244	0.223268814772735	1	51.1838032775397	56.9865819661022	69.3377288344294	45.6648779884661	55.754692922321	47.3072120116486
FBgn0038683	280.818391557609	0.186170969929066	0.152890962395663	1.21767151577788	0.223348825550816	1	191.939262290774	196.033841963392	177.504585816139	220.206189411047	186.657015435596	236.536060058243
FBgn0040477	132.644523224716	1.45029725487793	1.19138132367059	1.21732414808185	0.223480910071521	1	0	2.27946327864409	0	3.04432519923107	1.21205854178959	2.25272438150707
FBgn0039628	518.487512645712	-0.213596869857307	0.175475803704271	-1.21724400372191	0.223511392423564	1	908.51250817633	959.654040309161	995.689786062407	848.351955519058	778.141583828915	842.518918683646
FBgn0050334	11.7389616181211	-1.1415926369315	0.938155804791641	-1.21684759727627	0.223662206602059	1	5.8163412815386	1.13973163932204	2.77350915337718	3.04432519923107	0	1.12636219075354
FBgn0004870	58.0761168964879	0.384428554169778	0.316082747757209	1.21622757615695	0.223898241660328	1	183.79638449662	142.466454915255	87.3655383313811	153.231035027964	189.081132519176	199.366107763376
FBgn0033602	53.6253307108148	0.220908574710836	0.181646140513602	1.21614791311404	0.223928581391342	1	116.326825630772	125.370480325425	124.807911901973	165.408335824888	130.902322513275	129.531651936657
FBgn0005616	84.7581590337915	0.260560561759848	0.21430773708643	1.21582433421321	0.224051846883818	1	134.939117731696	133.348601800679	169.184058356008	186.718612219506	157.567610432646	177.965226139059
FBgn0262741	15.8687491581647	0.431057033993133	0.354711955706724	1.21523119550425	0.224277925559908	1	29.081706407693	23.9343644257629	19.4145640736402	41.6057777228246	29.0894050029501	27.0326925780849
FBgn0040660	994.784305885108	-0.156588200347732	0.128890011245695	-1.21489787171512	0.224405045632903	1	739.83861101171	851.379534573567	766.875280908789	734.697148081098	701.781895696171	679.196401024383
FBgn0004892	16.1989430059671	0.458609071171454	0.377647370521121	1.2143843886391	0.22460097401319	1	12.7959508193849	17.0959745898307	11.0940366135087	17.2511761289761	23.0291122940022	16.8954328613031
FBgn0038455	237.595963997091	-0.380358923180908	0.313256742002415	-1.21420825853439	0.224668207660112	1	176.816774958773	147.025381472544	327.274080098507	155.260585160785	179.384664184859	164.448879850016
FBgn0053834	15.833591240424	1.44974051724397	1.19408387884503	1.21410274682397	0.224708491234452	1	1.16326825630772	0	1.38675457668859	2.02955013282071	2.42411708357917	2.25272438150707
FBgn0051547	218.652213960132	0.192885898706341	0.158910589432723	1.21380141748201	0.224823564917597	1	425.756181808626	388.648489008817	313.406534331621	420.116877493888	443.613426294989	428.017632486344
FBgn0024184	15.6346359608186	0.380970819425047	0.313924314790885	1.21357537939941	0.224909913499023	1	39.5511207144625	27.3535593437291	27.7350915337718	36.5319023907729	38.7858733372668	48.4335742024021
FBgn0062928	284.158430022314	-0.269911865348384	0.222480605756992	-1.21319278338895	0.225056122602878	1	154.714678088927	175.518672455595	228.814505153617	164.393560758478	149.083200640119	148.679809179467
FBgn0034321	33.6812308361942	0.314763131256497	0.259456942025927	1.21316133921382	0.225068142016108	1	38.3878524581548	35.3316808189834	30.5086006871489	38.5614525235936	41.209990420846	50.6862985839092
FBgn0036937	21.874047144608	0.391440827228098	0.322805908711923	1.21261977139776	0.225275226159307	1	58.163412815386	53.5673870481361	26.3483369570832	62.9160541174421	49.6944002133731	69.8344558267193
FBgn0034314	218.769327368075	-0.359395323416705	0.296531752158204	-1.21199608743742	0.225513878335783	1	22.1020968698467	26.213827704407	27.7350915337718	17.2511761289761	25.4532293775813	16.8954328613031
FBgn0031868	369.128424355616	0.199341153716281	0.164496415932639	1.21182672939155	0.225578714212646	1	274.531308488622	231.365522782375	216.33371396342	271.959717797976	288.469932945922	270.326925780849
FBgn0023526	328.498282704448	0.246112568284018	0.203094502233573	1.21181305046343	0.225583951540829	1	314.082429203084	290.631568027121	262.096614994143	359.230373509266	375.738147954772	293.980531786673
FBgn0028963	14.931375661469	0.425759854503128	0.351354995825494	1.21176547811088	0.225602166511139	1	19.7755603572312	29.6330226223731	15.2543003435745	28.41370185949	27.8773464611605	31.538141341099
FBgn0266465	313.751731442835	-0.136726850594806	0.11283953544901	-1.21169278170762	0.225630003253479	1	375.735646787394	416.002048352546	349.462153325524	352.126948044394	340.588450242874	346.91955475209
FBgn0041629	745.24094326261	-0.214778761630352	0.177266433545771	-1.21161551758131	0.22565959174608	1	1055.0843084711	1243.44721850035	1392.30159499534	1123.35599851627	982.979477391355	1072.29680559737
FBgn0261278	1600.08178177563	0.17152074414926	0.141638050043436	1.21097928202669	0.225903345088802	1	481.593058111396	463.870777204072	388.291281472805	508.402308271589	494.519885050152	501.231174885324
FBgn0036331	98.8702259928946	0.31587638746339	0.26088083461545	1.21080717918204	0.225969313081949	1	31.4082429203084	43.3098022942377	33.2821098405261	40.5910026564143	50.9064587551627	43.928125439388
FBgn0033702	17.1328395853891	-0.491240113711641	0.405771855797149	-1.21063131090398	0.226036738589563	1	19.7755603572312	28.4932909830511	44.3761464540348	26.3841517266693	21.8170537522126	16.8954328613031
FBgn0011770	1145.73182788186	-0.150356589603835	0.124236819357468	-1.2102417816349	0.226186129934933	1	1436.63629654003	1537.49798144544	1187.06191764543	1280.64613380987	1155.09179032548	1315.59103880013
FBgn0263660	182.010833836121	-0.163363884308711	0.135023603742955	-1.20989130626159	0.226320603625634	1	253.592479875083	251.880692290172	307.859516024867	227.30961487592	250.896118150445	246.673319775025
FBgn0037879	11.6904428743039	0.781565435244449	0.64603585151097	1.20978647456871	0.226360837517286	1	3.48980476892316	2.27946327864409	6.93377288344294	6.08865039846214	6.06029270894794	9.0108975260283
FBgn0263116	84.6874931188684	0.290528979487538	0.240215468449317	1.20945158679004	0.226489400000455	1	222.184236954775	165.261087701696	142.835721398925	221.220964477458	231.503181481811	197.113383381869
FBgn0001565	1153.53810152025	-0.139571878652149	0.115403261603135	-1.20942750415607	0.226498647263666	1	798.002023827096	819.46704867255	873.655383313811	779.347251003154	756.324530076703	724.250888654525
FBgn0038917	54.3786376530807	0.316217454404357	0.261477407120915	1.20934905193598	0.226528773258721	1	39.5511207144625	29.6330226223731	36.0556189939033	34.5023522579521	53.3305758387418	43.928125439388
FBgn0051451	3560.07689916691	-0.233375312341435	0.192992753824921	-1.20924391054157	0.226569152495652	1	7610.10093276511	8162.75800082448	8603.425393776	7091.24816407558	7091.75452801088	6552.04886361333
FBgn0026403	523.094059982234	0.264530919237127	0.218772885209756	1.20915770244333	0.226602264287649	1	1197.00303574064	1169.36466194442	847.307046356728	1256.29153221602	1233.8755955418	1371.90914833781
FBgn0039154	107.97551617981	0.490290947864648	0.405579739434111	1.20886449739509	0.226714907669643	1	12.7959508193849	9.11785311457635	15.2543003435745	10.1477506641036	25.4532293775813	16.8954328613031
FBgn0029755	139.140796746473	-0.241886861332879	0.200099518510668	-1.20883280046465	0.226727087373692	1	80.2655096852327	74.0825565559329	72.1112379878066	72.0490297151353	56.9667514641106	61.9499204914446
FBgn0037270	1543.144376761	-0.168495046762675	0.139398497656655	-1.20872928758304	0.226766865966813	1	1342.41156777911	1449.73864521764	1618.34259099558	1329.35533699757	1313.87145929991	1279.54744869602
FBgn0030170	298.984101362419	-0.981647582470089	0.812224853383281	-1.20859091959706	0.226820046676248	1	5.8163412815386	1.13973163932204	4.16026373006577	0	3.63617562536876	2.25272438150707
FBgn0085376	198.936830672701	0.275971041895424	0.228367393825392	1.20845203543563	0.226873434717891	1	393.184670632009	392.067683926783	289.831706527915	419.102102427477	429.068723793514	455.050325064429
FBgn0035867	213.374743831721	0.169249888982256	0.140082588166989	1.20821503369496	0.226964560536055	1	147.73506855108	182.357062291527	176.117831239451	179.615186754633	186.657015435596	202.745194335637
FBgn0262976	180.033814836598	-0.249285181682142	0.206346259539727	-1.20809159438215	0.227012032584002	1	133.775849475388	160.702161144408	191.372131583025	172.511761289761	121.205854178959	112.636219075354
FBgn0260642	10.4470469207756	0.600678104010651	0.497598616237987	1.20715388750873	0.227372885240188	1	17.4490238446158	15.9562429505086	2.77350915337718	13.1920758633346	23.0291122940022	20.2745194335637
FBgn0033785	24.904165524389	0.468834722355243	0.388396216625179	1.20710424635184	0.22739199976717	1	10.4694143067695	10.2575847538984	16.6410549202631	22.3250514610279	12.1205854178959	15.7690706705495
FBgn0037065	224.40105823291	-0.778471360024858	0.645083731738683	-1.20677568154859	0.227518543846384	1	5.8163412815386	2.27946327864409	9.70728203682012	3.04432519923107	2.42411708357917	4.50544876301415
FBgn0283451	100.793125263888	0.325616624993086	0.269982128588999	1.2060673300668	0.227791530428919	1	262.898625925545	208.570889995934	144.222475975613	241.516465805665	273.925230444447	257.93694168256
FBgn0034928	11.7188798393033	-0.548102760529851	0.454527643981436	-1.20587332319052	0.227866338070273	1	16.2857555883081	19.3754378684747	11.0940366135087	9.13297559769321	10.9085268761063	12.3899840982889
FBgn0261053	122.457325341146	0.200627812455747	0.166391315665124	1.20575891628579	0.227910460745308	1	248.939406849852	208.570889995934	183.051604122894	225.280064743099	247.259942525076	265.821477017835
FBgn0038472	114.808864641826	-0.249842130996553	0.207235740091876	-1.2055938366895	0.227974136803846	1	68.6328271221555	76.3620198345769	58.2436922209207	48.7092031876971	66.6632197984273	57.4444717284304
FBgn0011824	53.8597915385697	0.646364376576004	0.53617770530833	1.20550401513676	0.228008788944252	1	29.081706407693	27.3535593437291	9.70728203682012	39.5762275900039	41.209990420846	23.6536060058243
FBgn0035611	21.9312120093335	0.464053574858954	0.385256928331446	1.20453012193389	0.228384746873614	1	10.4694143067695	18.2357062291527	13.8675457668859	22.3250514610279	21.8170537522126	14.642708479796
FBgn0039252	621.834543618024	-0.106993218630143	0.0888435359073015	-1.20428816275141	0.228478220282779	1	511.838032775397	498.062726383733	506.165420491335	418.087327361067	498.15606067552	494.473001740803
FBgn0039532	381.060619766223	-0.157276255841485	0.130646736783366	-1.20382842858353	0.228655899342598	1	287.327259308007	278.094519994579	255.1628421107	260.797192067462	239.987591274338	235.409697867489
FBgn0039529	215.691456108186	-0.170045440475697	0.141277353747203	-1.2036284370103	0.228733223220728	1	302.449746640007	313.426200813562	317.566798061687	262.826742200282	276.349347528026	290.601445214413
FBgn0037073	617.424581021106	0.184047994890153	0.152928692980075	1.20348896798674	0.228787157939078	1	385.041792837855	305.448079338308	299.538988564735	357.200823376446	399.979318790564	369.44679856716
FBgn0085405	795.911781629585	-0.189703176577311	0.157633202004782	-1.20344682569829	0.228803456761661	1	1635.55516836865	1577.38858882171	1225.89104579271	1311.08938580218	1255.69264929401	1326.85466070767
FBgn0010473	466.441896684256	0.346819714722087	0.288202432747372	1.20338926849413	0.228825718745377	1	1421.51380920803	1309.55165358103	757.167998871969	1335.44398739603	1603.55345078762	1499.18807589296
FBgn0034031	129.347167521314	-1.45687124093463	1.21128010325656	-1.20275338215975	0.229071769584041	1	3.48980476892316	0	2.77350915337718	1.01477506641036	1.21205854178959	0
FBgn0033459	27.2778123523196	-0.986226811318959	0.820464116173125	-1.20203527720261	0.229349860565929	1	1.16326825630772	4.55892655728818	5.54701830675435	3.04432519923107	0	2.25272438150707
FBgn0085265	54.6183843113203	1.44593086674067	1.20306160027716	1.2018760023656	0.22941157335653	1	1.16326825630772	0	1.38675457668859	3.04432519923107	1.21205854178959	2.25272438150707
FBgn0261547	898.644515408251	-0.14812685163465	0.123291341179045	-1.20143758854516	0.229581502642181	1	1569.24887775911	1547.75556619934	1673.81277406313	1420.6850929745	1455.68230868929	1446.24905292754
FBgn0030030	210.887069615917	0.165908727345544	0.138175667629471	1.20070870792129	0.229864215082408	1	207.061749622774	234.784717700341	188.598622429648	264.856292333103	230.291122940022	212.882454052419
FBgn0261989	1662.82687030477	0.451143317411134	0.375814917987173	1.20044015236918	0.229968442681216	1	318.735502228315	330.522175403393	586.597185939273	548.993310928003	597.544861102267	541.780213752452
FBgn0036997	348.681757461038	-0.20010510420381	0.16670952400118	-1.2003219696218	0.230014320577326	1	764.267244394172	669.02247228204	705.858079534492	504.343208005947	646.02720277385	712.987266746989
FBgn0026593	350.31547894312	0.13812522022653	0.115089747860275	1.20015225330254	0.230080214908689	1	408.30715796401	447.914534253563	442.37470996366	496.225007474665	464.218421505412	467.440309162718
FBgn0038584	273.806349755273	-0.186568505125865	0.155514864569558	-1.19968278043555	0.230262563124617	1	117.49009388708	121.951285407459	135.901948515482	114.66958250437	109.085268761063	104.751683740079
FBgn0015024	1200.18941282733	0.148619189350678	0.123889644907798	1.19960945453741	0.230291052952505	1	1302.86044706465	1310.69138522035	1214.7970091792	1467.36474602938	1410.83614264308	1366.27733738404
FBgn0028429	308.393577621792	0.158076982388667	0.13189084383816	1.19854402162018	0.230705295906362	1	244.286333824621	258.719082126104	293.991970257981	291.240444059772	288.469932945922	307.496878075716
FBgn0014019	1346.06195260403	-0.146747424769712	0.122490190267289	-1.198034099298	0.230903742243269	1	2627.82299099914	2476.6368522468	2608.48535875124	2311.65760128279	2439.87384462244	2215.55442921221
FBgn0004872	747.421679266426	-0.718457838276598	0.59980422890515	-1.19782056153227	0.23098688070316	1	8.14287779415404	6.83838983593226	2.77350915337718	4.05910026564143	1.21205854178959	5.63181095376769
FBgn0015571	268.794563919678	-0.18954708537373	0.158273185951025	-1.19759442659088	0.231074946914618	1	159.367751114158	182.357062291527	199.692659043157	148.157159695912	141.810849389382	183.597037092827
FBgn0038597	229.638685990629	0.211429730057516	0.176550855467537	1.19755709762841	0.231089486635766	1	160.531019370465	150.44457639051	101.233084098267	164.393560758478	140.598790847592	174.586139566798
FBgn0067779	473.252902220663	0.180697968436422	0.151067418198408	1.19614123674966	0.231641447827475	1	571.164713847091	518.57789589153	414.639618429888	569.28881225621	569.667514641106	568.812906330536
FBgn0030082	274.899272342563	-0.182080000066852	0.152238440480391	-1.1960185580744	0.23168931709146	1	153.551409832619	185.776257209493	209.399941079977	164.393560758478	153.931434807278	163.322517659263
FBgn0030777	116.160817025703	-1.46043567720368	1.22119537679798	-1.1959066542104	0.231732988146013	1	1.16326825630772	1.13973163932204	4.16026373006577	1.01477506641036	0	1.12636219075354
FBgn0031258	273.532598321549	0.227961204816303	0.190658472236044	1.19565211103798	0.231832346687638	1	582.797396410168	518.57789589153	478.430328957563	570.303587322621	646.02720277385	635.268275584995
FBgn0036847	313.933785178443	-0.212631764966194	0.177877623701754	-1.19538231139579	0.231937693466591	1	223.347505211082	225.666864585765	299.538988564735	219.191414344637	209.686127729599	215.135178433926
FBgn0039747	44.475634546922	0.281563425086644	0.235558228562743	1.19530286334976	0.231968721465764	1	88.4083874793867	76.3620198345769	84.5920291780039	96.4036313089839	104.237034593905	102.498959358572
FBgn0033341	100.698736764055	0.231709089337056	0.193864492064015	1.19521159790595	0.232004368321656	1	74.4491684036941	72.9428249166108	81.8185200246267	83.2115554456493	94.5405662595878	91.2353374510365
FBgn0003731	1834.3677218833	0.219762436486019	0.183920930877678	1.1948745335145	0.232136054106831	1	4576.29732031457	3852.29294090851	2824.81907271465	4077.36621683681	4341.5936966903	4689.04580010698
FBgn0030434	218.268557560339	-0.197817123272406	0.165641210686636	-1.19425064844908	0.232379936209752	1	161.694287626773	173.239209176951	126.194666478662	148.157159695912	136.962615222223	118.268030029121
FBgn0033972	248.405028473057	0.170168063394796	0.142564536481989	1.19362127211976	0.232626149080834	1	165.184092395696	192.614647045425	203.852922773223	207.014113547713	209.686127729599	214.008816243172
FBgn0037836	52.3601965301904	0.314968378785104	0.263913415700373	1.1934534587764	0.232691829131515	1	175.653506702466	164.121356062374	87.3655383313811	173.526536356171	186.657015435596	173.459777376045
FBgn0036831	149.972561708319	1.5557046762725	1.30422686455535	1.19281753700334	0.232940840375937	1	0	42.1700706549156	1.38675457668859	39.5762275900039	0	88.9826130695295
FBgn0029093	4574.07940242384	-0.148887491822127	0.124881673704506	-1.1922285104412	0.233171657182811	1	5249.82964071674	5307.73024432276	5598.32822609183	4982.54557607485	4867.62710382698	4720.58394144808
FBgn0032997	419.32561775216	0.121719284447882	0.102119691408554	1.19192765635096	0.233289612863632	1	328.041648278777	370.412782779664	356.395926208967	402.865701364912	363.617562536876	379.584058283942
FBgn0034253	66.0667118146575	0.294537369647939	0.247134956357784	1.19180780407904	0.233336615054815	1	69.7960953784632	66.1044350806785	63.7907105276751	82.1967803792389	70.2993954237961	92.3616996417901
FBgn0040342	44.1850790101632	-1.45654404923651	1.22226947730224	-1.19167178456534	0.233389965650192	1	3.48980476892316	1.13973163932204	1.38675457668859	1.01477506641036	0	1.12636219075354
FBgn0039627	196.606100581188	0.222699892728788	0.187002389488564	1.19089330001533	0.233695475113744	1	54.6736080464629	63.8249718020345	65.1774651043637	67.9899294494939	81.2079222999024	65.3290070637052
FBgn0002590	9540.5515889798	-0.178686258045112	0.150181893524276	-1.18979894214896	0.234125425478403	1	9720.26954970731	10351.0427483228	9873.69258602275	9330.85673564323	8605.61564670607	8519.80361085976
FBgn0037378	546.420777759797	-0.183452888215558	0.154301751276166	-1.18892291693578	0.234470001184566	1	232.653651261544	274.675325076613	284.284688221161	248.619891270537	219.382596063915	227.525162532215
FBgn0051133	95.3930178128742	-0.250196477519057	0.210517990404683	-1.18848026735435	0.234644249495735	1	58.163412815386	63.8249718020345	55.4701830675435	41.6057777228246	65.4511612566377	43.928125439388
FBgn0014000	760.570017761147	-0.223635417189103	0.188221269776594	-1.18815167624011	0.23477365816669	1	1113.24772128649	1229.77043882849	1417.26317737574	1105.09004732088	1032.67387760473	1081.3077031234
FBgn0051202	14.0151977613628	0.719658505233284	0.606053905434472	1.18744966211771	0.235050300916564	1	2.32653651261544	7.97812147525431	1.38675457668859	7.1034254648725	8.48440979252711	4.50544876301415
FBgn0040239	96.3922474809255	0.260832663212083	0.21985840158308	1.18636659474448	0.235477557901113	1	80.2655096852327	59.2660452447463	72.1112379878066	83.2115554456493	77.5717466745336	92.3616996417901
FBgn0030114	254.587219669182	-0.155886443878972	0.131418330305971	-1.1861849371852	0.235549273402622	1	324.551843509854	286.072641469833	328.660834675196	259.782417001051	281.197581695184	301.865067121948
FBgn0058469	55.2152144827248	0.586861342601313	0.494810282974487	1.18603303689138	0.235609253075958	1	32.5715111766162	26.213827704407	38.8291281472805	26.3841517266693	78.7838052163232	41.6754010578809
FBgn0265048	719.614481620106	0.214307572756552	0.180698950833856	1.18599234676021	0.235625321902901	1	1530.86102530096	1523.82120177357	1256.39964647986	1663.21633384658	1673.85284621142	1665.88968012448
FBgn0000449	7.77061765028631	-1.45940472948533	1.23102384864857	-1.18552108562924	0.235811482832903	1	1.16326825630772	2.27946327864409	2.77350915337718	1.01477506641036	0	1.12636219075354
FBgn0261530	289.694943702958	-0.164651287689158	0.138887039095851	-1.18550506052279	0.23581781501354	1	187.286189265543	189.195452127459	237.135032613749	186.718612219506	168.476137308753	189.228848046594
FBgn0262730	393.767826709175	0.338752160670422	0.285827174242064	1.18516429226403	0.235952495089054	1	764.267244394172	800.091610804075	502.005156761269	873.721332179317	886.014794048188	854.908902781935
FBgn0264748	91.0158927857944	-0.280951974648068	0.237066330287733	-1.18511968488764	0.235970129058358	1	107.02067958031	176.658404094917	169.184058356008	129.891208500526	109.085268761063	132.910738508917
FBgn0020299	319.590619241683	-0.13835213560847	0.116818011998691	-1.18433906930397	0.23627886909807	1	632.8179314314	650.786766052887	637.907105276751	609.879814912625	573.303690266475	562.054733186015
FBgn0085446	1046.76594701799	0.145249151838039	0.122651429378479	1.1842434497019	0.236316707086977	1	1697.20838595296	1578.52832046103	1347.92544854131	1623.64010625657	1692.03372433826	1801.05314301491
FBgn0033482	759.604243074982	0.149535570906494	0.126293726804921	1.18403007567805	0.236401157566214	1	689.818075990478	627.992133266446	593.530958822716	632.204866373652	758.748647160282	732.135423989799
FBgn0011672	1143.76432809481	0.119165373506157	0.100663591001601	1.1837981570145	0.23649297195747	1	1058.57411324003	1007.52276916069	1228.66455494609	1122.34122344985	1282.35793721338	1171.41667838368
FBgn0259222	182.451617191399	0.287905869636299	0.243348475402498	1.18310118508079	0.236769048246264	1	538.593202670475	439.936412778309	320.340307215064	479.988606412099	532.093699845629	575.571079475058
FBgn0022710	397.779433998237	0.175520794912153	0.148490402711238	1.18203460767414	0.237191969232074	1	731.695733217556	748.803687034583	739.140189375018	773.258600604692	872.682150088503	861.667075926456
FBgn0037485	51.988004840002	-0.982632732007636	0.831482532185309	-1.18178397497428	0.237291427922081	1	3.48980476892316	3.41919491796613	4.16026373006577	1.01477506641036	1.21205854178959	3.37908657226061
FBgn0033458	234.442889533549	0.279222849402995	0.236327214877235	1.1815094996488	0.237400381893302	1	34.8980476892316	44.4495339335597	56.8569376442321	37.5466774571832	73.9355710491648	54.0653851561698
FBgn0287768	13.669104440495	0.689282424306523	0.583469404717316	1.18135144488077	0.23746313833777	1	3.48980476892316	6.83838983593226	4.16026373006577	4.05910026564143	14.544702501475	5.63181095376769
FBgn0029689	165.909174614272	-0.211918418218312	0.179402181187015	-1.18124772405861	0.23750432758286	1	147.73506855108	112.833432292882	137.28870309217	106.551381973087	117.56967855359	119.394392219875
FBgn0033092	132.329690024238	0.186207472421976	0.157641339270127	1.18120965784806	0.237519445567392	1	174.490238446158	152.724039669154	146.99598512899	186.718612219506	192.717308144544	161.069793277756
FBgn0035632	423.408696892155	-0.144179016411305	0.122061627218667	-1.18119854451077	0.237523859354288	1	344.327403867085	320.264590649494	303.699252294801	287.181343794131	284.833757320553	305.244153694209
FBgn0025827	210.252445276328	-0.255763454894261	0.216559939813356	-1.18102847236979	0.237591412646029	1	291.980332333238	359.015466386444	413.252863853199	294.284769259004	309.074928156345	287.222358642152
FBgn0024996	346.409257448232	-0.159951994261981	0.135454619883759	-1.1808530000619	0.237661125127595	1	273.368040232314	287.212373109155	273.190651607652	263.841517266693	236.35141564897	245.546957584271
FBgn0036369	67.9609225356163	0.310259691445727	0.262759599027179	1.18077395685794	0.237692532510843	1	132.61258121908	148.165113111866	92.9125566381354	151.201484895143	150.295259181909	163.322517659263
FBgn0028476	573.468606287122	0.234735148650531	0.199023103389092	1.17943668173851	0.238224335832003	1	549.062616977244	565.306893103734	507.552175068023	614.953690244676	655.723671108167	638.647362157256
FBgn0032715	267.105203749545	0.206251472241851	0.174878771159038	1.17939685231596	0.23824018794164	1	146.571800294773	176.658404094917	149.769494282368	168.452661024119	238.775532732549	140.795273844192
FBgn0039562	1514.90049795395	0.217679881209344	0.184580943692136	1.17931936447575	0.238271030234629	1	1562.26926822127	1547.75556619934	1564.25916250473	1844.86107073403	1812.02751997543	1778.52589919984
FBgn0038063	731.061208229263	0.282067152699114	0.239329208833119	1.17857387351243	0.238567900166681	1	2034.5561802822	1724.41397029425	1180.12814476199	1898.64414925378	2072.62010646019	2036.4628408824
FBgn0028509	812.277387060881	0.165409768441503	0.140397223850485	1.17815554969702	0.238734599662294	1	1480.84049027973	1391.61233161222	1210.63674544914	1482.58637202553	1598.70521662047	1500.31443808371
FBgn0035260	27.8774083233355	0.378310573831511	0.321288132108594	1.17748069730644	0.239003697460333	1	50.020535021232	72.9428249166108	56.8569376442321	62.9160541174421	83.6320393834815	87.8562508787759
FBgn0040005	810.799634394531	-0.194851748735404	0.165501190462406	-1.17734348732473	0.239058436189947	1	856.165436642482	855.938461130855	1058.09374201339	840.233754987776	798.746579039338	779.442636001448
FBgn0001323	79.0509276901933	0.219382784674437	0.18634271057453	1.17730811147931	0.239072550509919	1	203.571944853851	194.89411032407	148.382739705679	222.235739543868	193.929366686334	221.893351578447
FBgn0038532	363.86865441057	0.200061557673066	0.169945157654357	1.17721246332867	0.239110715328679	1	400.164280169856	362.43466130441	306.472761448178	380.540649903884	402.403435874143	447.165789729154
FBgn0030932	1140.34174800396	-0.178747854466188	0.151843414295947	-1.17718542680952	0.23912150401997	1	312.919160946777	276.954788355257	332.821098405261	267.900617532334	270.289054819078	275.958736734617
FBgn0032382	1804.82271706208	-0.170236503457804	0.144618538595397	-1.17714163834886	0.239138978158392	1	2780.21113257545	2914.29380174647	2709.7184428495	2443.57835991614	2468.96324962539	2556.84217301053
FBgn0085450	773.231949346613	0.255184320863454	0.216819442440243	1.17694390314552	0.239217897203744	1	2000.82140084928	1757.46618783459	1357.63273057813	1875.30432272634	2096.86127729599	2135.58271366871
FBgn0040078	447.477247046666	0.155098268553961	0.131783341861811	1.17691861780678	0.239227990281143	1	171.000433677235	126.510211964747	140.062212245547	157.290135293605	138.174673764013	191.481572428101
FBgn0030260	26.6008621477705	0.314329481246117	0.267147274850956	1.17661496424204	0.239349222281785	1	27.9184381513853	37.6111440976275	51.3099193374778	43.6353278556454	49.6944002133731	50.6862985839092
FBgn0031558	366.284563449814	-0.194428718141338	0.165393316452996	-1.17555365785651	0.239773283310047	1	545.572812208321	613.17562195526	664.255442233834	540.87511039672	423.008431084566	627.38374024972
FBgn0035028	393.856060457765	-0.117192009372176	0.0997050868044195	-1.17538646350169	0.23984013660914	1	340.837599098162	315.705664092206	318.953552638375	281.092693395669	313.923162323503	306.370515884962
FBgn0039736	46.0325831491757	0.506799656443555	0.431202484101992	1.17531710769014	0.239867872649988	1	4.65307302523088	7.97812147525431	13.8675457668859	18.2659511953864	8.48440979252711	9.0108975260283
FBgn0085382	228.483307880794	0.44976406877544	0.382737772833314	1.17512328466027	0.239945396289729	1	815.451047671712	650.786766052887	349.462153325524	729.623272749047	814.503340082603	937.133342706943
FBgn0031627	487.702616313368	0.272303550688744	0.231765790431872	1.17490829937125	0.240031404881449	1	1455.24858864096	1181.90170997696	811.251427362824	1263.39495768089	1368.41409368044	1535.23166599707
FBgn0031219	18.9545301164714	-0.363132520410629	0.309075939977567	-1.17489740688643	0.240035763187124	1	40.7143889707702	46.7289972122038	38.8291281472805	40.5910026564143	30.3014635447397	27.0326925780849
FBgn0033519	154.874848782361	-0.268452183371554	0.22852422227635	-1.17472091447234	0.240106389180979	1	58.163412815386	46.7289972122038	62.4039559509865	38.5614525235936	47.2702831297939	52.9390229654163
FBgn0036996	162.797171042431	-0.676630462808073	0.576162226640954	-1.17437490956818	0.240244890548482	1	3.48980476892316	6.83838983593226	9.70728203682012	5.07387533205179	6.06029270894794	1.12636219075354
FBgn0039507	396.603011896584	-0.128506311018513	0.109436848089447	-1.17425084203339	0.24029456691689	1	579.307591641245	591.520720808141	547.768057791993	477.959056279278	535.729875470998	560.928370995262
FBgn0038582	28.0634205136957	0.399295706273521	0.340170392035216	1.17381087720352	0.240470786211642	1	25.5919016387698	10.2575847538984	19.4145640736402	17.2511761289761	24.2411708357917	31.538141341099
FBgn0067905	752.512230847811	-0.271296447702847	0.231149688597562	-1.17368294696335	0.240522043245646	1	1371.4932741868	1416.6864276773	1236.98508240622	1224.8335051573	1060.55122406589	1049.7695617823
FBgn0034380	226.785263542825	0.168662826336414	0.143736670550193	1.1734154248238	0.24062925459675	1	154.714678088927	153.863771308476	171.957567509385	170.48221115694	185.444956893807	183.597037092827
FBgn0038237	448.657717385289	0.271497847707735	0.231448511502498	1.17303777823088	0.240780656383014	1	1091.14562441664	1081.60532571662	815.41169109289	1208.59710409474	1168.42443428516	1231.11387449362
FBgn0034879	214.953685093695	-0.215394089098842	0.183630703650002	-1.17297426202418	0.240806127169893	1	126.796239937542	93.4579944244076	122.034402748596	93.3593061097529	106.661151677484	94.6144240232971
FBgn0029849	435.713947580434	-0.123419520553834	0.105243271067332	-1.17270699876739	0.240913323844688	1	499.042081956012	483.246215072547	513.099193374778	444.471479087736	459.370187338254	468.566671353472
FBgn0033749	82.2564973463364	0.24466792877444	0.208645432672085	1.17264933931705	0.240936454892187	1	63.9797540969246	56.9865819661022	61.0172013742979	72.0490297151353	66.6632197984273	76.5926289712405
FBgn0030352	154.407832803993	-0.218359707547167	0.186254506788569	-1.17237274583129	0.241047436716605	1	107.02067958031	104.855310817628	126.194666478662	89.3002058441114	99.3888004267462	101.372597167818
FBgn0264078	668.799199021368	0.153966392237577	0.131341731398365	1.17225797618421	0.241093498059319	1	1336.59522649757	1219.51285407459	1033.132159633	1296.88253487244	1299.32675679844	1400.06820310665
FBgn0033629	21.1322836876968	-0.377284603023828	0.321924408645761	-1.17196643960907	0.241210530434189	1	70.9593636347709	46.7289972122038	48.5364101841006	40.5910026564143	47.2702831297939	40.5490388671274
FBgn0028737	4822.86290646945	-0.172179661307582	0.146956798019711	-1.17163454585128	0.241343812191407	1	2868.61952005484	3060.17945157969	2819.2720544079	2730.75970371027	2557.44352317603	2475.74409527628
FBgn0036889	183.335342113899	0.220045432913819	0.188049492140571	1.1701463822584	0.241942065700868	1	89.5716557356945	78.641483113221	69.3377288344294	95.3888562425736	93.3285077177982	88.9826130695295
FBgn0259224	448.62159893616	0.242834823375144	0.207542101868772	1.17005090142475	0.241980485339987	1	1001.57396868095	867.335777524075	668.4157059639	891.987283374704	1064.18739969126	1048.64319959154
FBgn0286075	243.472059344263	0.13255297650771	0.113345371525969	1.1694608674633	0.242217998809385	1	230.327114748929	223.387401307121	270.417142454275	256.73809180182	256.956410859393	277.08509892537
FBgn0025832	183.083109927737	-0.304368772372518	0.26035084186798	-1.16907158889411	0.242374789556746	1	29.081706407693	37.6111440976275	27.7350915337718	17.2511761289761	37.5738147954772	23.6536060058243
FBgn0032846	153.193886996449	-0.223481264334392	0.191195605087433	-1.16886193190578	0.242459263220221	1	145.408532038465	143.606186554578	151.156248859056	115.684357570781	130.902322513275	130.65801412741
FBgn0031327	198.852828151788	0.222210115931699	0.190153269459379	1.16858425081756	0.242571176592128	1	275.69457674493	305.448079338308	316.180043484998	332.846221782597	341.800508784664	371.699522948667
FBgn0259238	270.787793622794	0.182041602601965	0.15581676760501	1.16830560279259	0.242683516178054	1	201.245408341236	222.247669667799	184.438358699582	225.280064743099	212.110244813178	253.431492919546
FBgn0032706	145.918631920964	-0.205504289961205	0.175947789135999	-1.16798449682343	0.242813018448175	1	155.877946345235	185.776257209493	185.825113276271	161.349235559247	144.234966472961	150.932533560974
FBgn0033996	325.536841542991	-0.142270026229661	0.121813068573292	-1.16793729848502	0.242832057667126	1	298.959941871084	265.557471962036	295.378724834669	252.678991536179	252.108176692234	273.70601235311
FBgn0033993	78.7098463403154	-0.354940399468689	0.303956189917436	-1.16773538833047	0.242913517545117	1	24.4286333824621	27.3535593437291	22.1880732270174	8.11820053128286	25.4532293775813	25.9063303873314
FBgn0035624	98.067881986216	-0.25702987259483	0.220122022812887	-1.16766995555604	0.242939920268241	1	53.5103397901551	56.9865819661022	51.3099193374778	43.6353278556454	44.8461660462147	47.3072120116486
FBgn0026577	426.681016885414	0.308832934222609	0.264527704621203	1.1674880506934	0.243013331144403	1	478.103253342473	496.922994744411	475.656819804186	593.643413850059	596.332802560477	607.109220816157
FBgn0259246	745.205438061942	0.326985487436532	0.280125418786342	1.16728245816897	0.243096320359025	1	2312.57729353975	1962.61788291256	1187.06191764543	2080.28888614123	2485.93206921044	2287.64160942043
FBgn0038321	452.450208253689	-0.180963730650701	0.155083087078739	-1.16688243740481	0.243257849309411	1	529.287056620013	600.638573922717	636.520350700062	515.505733736461	507.852529009837	533.895678417177
FBgn0261239	476.125535240486	0.221690821613191	0.190029284827566	1.16661398696709	0.243366292262913	1	741.001879268018	697.515763265091	532.513757448418	727.593722616226	790.262169246811	782.821722573709
FBgn0028421	408.948580772515	0.246119130712153	0.211072240826891	1.16604215574707	0.243597401837099	1	474.61344857355	498.062726383733	510.325684221401	607.850264779804	581.788100059002	568.812906330536
FBgn0035318	134.808100019293	0.295813700967813	0.253885335533359	1.16514685791667	0.243959552317249	1	98.8778017861562	91.1785311457635	91.5258020614469	98.4331814418046	129.690263971486	118.268030029121
FBgn0046114	1041.46210564054	0.120294320383462	0.103256279487954	1.16500730977331	0.244016033978026	1	917.818654226791	1048.55310817628	998.463295215784	1028.9819173401	1066.61151677484	1127.48855294429
FBgn0023519	161.248209703095	-0.205527339260644	0.176487622870654	-1.16454250965391	0.244204226561338	1	110.510484349233	105.99504245695	99.8463295215784	104.521831840267	83.6320393834815	85.6035264972688
FBgn0027836	729.953638543882	-0.200852755364761	0.17248444317441	-1.16446881624951	0.244234073588149	1	953.879970172331	989.287062931534	1191.2221813755	913.297559769321	841.168628001974	970.924208429549
FBgn0262624	143.728586004506	-0.452290730067815	0.388534730327778	-1.16409343814966	0.244386147575626	1	17.4490238446158	12.5370480325425	12.4807911901973	7.1034254648725	14.544702501475	10.1372597167818
FBgn0022986	98.2628700713721	0.197861134580758	0.169998414167252	1.16389988430182	0.244464586500228	1	107.02067958031	94.5977260637297	97.0728203682012	114.66958250437	126.054088346117	102.498959358572
FBgn0028647	252.786271631256	0.157582421201844	0.135394054125503	1.16387992234706	0.244472677214306	1	180.306579727697	188.055720488137	187.211867852959	202.955013282071	207.262010646019	209.503367480158
FBgn0039830	8191.65741783578	0.132213160312761	0.113597931810549	1.1638694314722	0.244476929311566	1	7793.89731726173	7574.6564749343	6491.39817347928	8295.78616790467	7678.39086223704	7985.90793244258
FBgn0000018	187.740992128856	0.200608232294904	0.172447611822313	1.16329956776442	0.244707980996855	1	80.2655096852327	67.2441667200006	76.2715017178724	72.0490297151353	110.297327302852	76.5926289712405
FBgn0037753	31.4227725755159	-0.338304086513915	0.290877690221733	-1.16304583639958	0.244810905873533	1	32.5715111766162	41.0303390155936	66.5642196810523	42.620552789235	32.7255806283189	33.7908657226061
FBgn0000964	119.439205198461	0.380564244322308	0.327266680923778	1.16285667470971	0.244887658145469	1	143.08199552585	152.724039669154	102.619838674956	142.06850929745	199.989659395282	177.965226139059
FBgn0030891	329.98011035205	-0.158704025503586	0.136481189479953	-1.16282709806612	0.244899660381912	1	300.123210127392	299.749421141698	409.092600123134	320.668920985673	287.257874404132	291.727807405166
FBgn0052027	44.1274351001997	0.860610894758862	0.740161231983351	1.16273435782735	0.244937297155389	1	4.65307302523088	1.13973163932204	1.38675457668859	9.13297559769321	1.21205854178959	2.25272438150707
FBgn0033815	66.2858379151716	-0.295039506758132	0.253786561544467	-1.16254976214112	0.245012223706985	1	47.6939985086165	29.6330226223731	45.7629010307234	40.5910026564143	30.3014635447397	28.1590547688384
FBgn0001114	1849.83640034623	0.250050193229824	0.215154646657759	1.16218820794316	0.245159023510266	1	3673.60115341978	4132.66692418173	3396.16195831035	4193.0505744076	4285.83900376798	4844.48378243097
FBgn0032236	359.567323366968	-0.180703511375903	0.155528392171592	-1.16186831775729	0.245288958152861	1	202.408676597543	198.313305242036	224.654241423551	209.043663680534	161.203786058015	179.091588329812
FBgn0033566	164.292653902875	-0.232287278158714	0.199966727315474	-1.16162964347689	0.245385935564345	1	65.1430223532323	78.641483113221	63.7907105276751	64.9456042502628	44.8461660462147	66.4553692544587
FBgn0038854	423.580621216909	0.10505453709273	0.0904572818019487	1.16137180998586	0.245490727903777	1	324.551843509854	360.155198025766	336.981362135327	352.126948044394	375.738147954772	372.825885139421
FBgn0036918	395.229872743123	-0.205317445604964	0.17679742141992	-1.16131470671908	0.245513940867231	1	207.061749622774	210.850353274578	278.737669914406	229.339165008741	179.384664184859	192.607934618855
FBgn0040233	1107.3655962272	-0.199440710848464	0.171758532220461	-1.16116916155566	0.245573113175859	1	550.225885233552	551.630113431869	493.684629301138	475.929506146457	454.521953171095	459.555773827443
FBgn0267661	17.2485572951626	-0.570924177200387	0.491773341078966	-1.16094983096839	0.245662302307864	1	10.4694143067695	5.69865819661022	12.4807911901973	5.07387533205179	10.9085268761063	3.37908657226061
FBgn0265068	22.751640121469	-0.405420260740006	0.349271855460746	-1.16075845906677	0.245740140805628	1	24.4286333824621	31.9124859010172	42.9893918773463	27.3989267930796	26.6652879193709	20.2745194335637
FBgn0261574	1996.39494077193	0.264265382489638	0.227685466460843	1.16065986379102	0.245780250141254	1	2690.63947683976	2126.73923897493	1487.98766078686	2298.46552541946	2659.25644068635	2617.66573131122
FBgn0039205	91.0068274908285	-0.340330611033007	0.293281836342912	-1.1604217133825	0.245877150539607	1	59.3266810716937	88.8990678671194	117.87413901853	88.2854307777011	60.6029270894794	59.6971961099375
FBgn0019662	247.012936908439	0.126334737356123	0.108894752607075	1.16015450085071	0.245985907834107	1	353.633549917547	315.705664092206	321.727061791753	354.156498177215	362.405503995087	366.0677119949
FBgn0032414	39.5483826165765	0.252553703258644	0.217903194756634	1.15901790031445	0.246448888682141	1	96.5512652735408	95.7374577030517	83.2052746013153	99.447956508215	112.721444386432	117.141667838368
FBgn0025742	305.459537035414	-0.145437084476532	0.125506675525604	-1.15879959267077	0.246537883592775	1	229.163846492621	233.644986061019	280.124424491095	220.206189411047	218.170537522126	230.904249104475
FBgn0263395	715.579706604675	0.256654495762954	0.221552560136791	1.15843615440278	0.246686092144721	1	1388.94229803142	1145.43029751865	1017.87785928942	1299.92686007167	1464.16671848182	1481.1662808409
FBgn0030346	234.007726921419	-0.151090530963611	0.130452189993423	-1.15820616711171	0.246779912209517	1	202.408676597543	168.680282619663	185.825113276271	180.629961821044	187.869073977386	132.910738508917
FBgn0013531	112.030395754513	-0.299814060338821	0.258946435471737	-1.15782269716373	0.24693639893609	1	33.7347794329239	35.3316808189834	36.0556189939033	37.5466774571832	23.0291122940022	23.6536060058243
FBgn0266457	40.6390938397386	0.260355165506276	0.224947371732158	1.15740478984692	0.247107018027813	1	59.3266810716937	64.9647034413565	54.083428490855	61.9012790510318	78.7838052163232	74.3399045897335
FBgn0014427	1729.8255130231	-0.163078823279066	0.140926659779444	-1.15718930353058	0.247195026917728	1	2378.88358414929	2454.98195109968	2311.71987933988	2108.70258800072	2005.95688666177	2267.36708998687
FBgn0283438	477.013469272773	0.131563143144358	0.113781006503319	1.15628387538056	0.247565061629183	1	516.491105800628	487.805141629835	393.838299779559	500.284107740306	518.761055885943	517.000245555874
FBgn0086355	3410.44850505843	-0.116867552780338	0.10109128584702	-1.15605961286508	0.247656774195478	1	3442.11077041454	3545.70512993088	3537.61092513259	3204.65965972391	3054.38752530976	3446.66830370582
FBgn0033289	77.1496080828211	0.25049785681555	0.21669512319906	1.15599212902193	0.247684376491233	1	143.08199552585	147.025381472544	122.034402748596	138.009409031809	158.779668974436	194.860659000362
FBgn0035710	445.296655811977	0.142963677047846	0.123725671121594	1.15548920245779	0.247890151744852	1	616.532175843092	600.638573922717	622.652804933176	653.51514276827	636.330734439533	741.146321515828
FBgn0036790	47.2958753096733	0.42892499766696	0.371310378744494	1.15516565714451	0.248022595370738	1	146.571800294773	118.532090489493	73.4979925644952	138.009409031809	180.596722726649	138.542549462685
FBgn0000052	3179.85876147854	-0.204799290918324	0.177324058800441	-1.15494362301285	0.248113513930082	1	6402.62848271769	5216.55171317699	5451.33224096284	4422.38973941634	5263.97024699218	5126.07433011935
FBgn0036324	21.6025067284384	-0.468549939530217	0.40569102450547	-1.15494282897033	0.248113839116539	1	11.6326825630772	14.8165113111866	23.574827803706	13.1920758633346	12.1205854178959	10.1372597167818
FBgn0039637	1021.11837914914	-0.10496429082127	0.0908895417770758	-1.15485553969141	0.248149588757726	1	859.655241411405	782.995636214244	945.766621301617	779.347251003154	818.139515707972	806.475328579533
FBgn0014465	777.665372527518	0.463253531332939	0.401368929953893	1.15418383626793	0.248424807912749	1	18.6122921009235	6.83838983593226	9.70728203682012	19.2807262617968	12.1205854178959	16.8954328613031
FBgn0037301	352.181056033614	-0.136885803435016	0.118638854731186	-1.15380246838335	0.248581161970592	1	244.286333824621	276.954788355257	316.180043484998	245.575566071306	260.592586484761	253.431492919546
FBgn0031505	627.522226397114	-0.197336080102149	0.171048420144047	-1.15368548821418	0.24862913555286	1	568.838177334475	591.520720808141	701.697815804426	555.081961326465	519.973114427733	547.412024706219
FBgn0034299	238.334781807854	0.304306929778268	0.263847896169824	1.15334226346229	0.24876992943668	1	26.7551698950776	18.2357062291527	27.7350915337718	24.3546015938486	26.6652879193709	38.2963144856203
FBgn0265070	54.3627250932087	0.253775524439097	0.220036581878771	1.1533333333587	0.248773593389625	1	118.653362143387	100.29638426034	81.8185200246267	112.64003237155	101.812917510325	145.300722607206
FBgn0031977	576.062064813332	-0.224592638265693	0.194744726994432	-1.15326685210899	0.248800871322183	1	276.857845001237	268.976666880002	336.981362135327	239.486915672844	263.01670356834	252.305130728792
FBgn0016119	668.938842389676	0.199913453859623	0.173356047370407	1.1531957315136	0.248830055140952	1	509.511496262781	552.769845071191	553.315076098747	623.071890775959	587.84839276795	644.279173111023
FBgn0053192	69.50483766348	-0.507394291904217	0.440026678033214	-1.1530989306651	0.248869780510841	1	19.7755603572312	7.97812147525431	18.0278094969517	16.2364010625657	4.84823416715835	10.1372597167818
FBgn0034437	10.197011672515	0.769165538729319	0.667272625608558	1.15270057426353	0.249033305663244	1	3.48980476892316	2.27946327864409	4.16026373006577	6.08865039846214	4.84823416715835	5.63181095376769
FBgn0003975	20.2192310277642	0.413808340075788	0.359100273955524	1.15234760340796	0.249178262823579	1	19.7755603572312	25.074096065085	19.4145640736402	24.3546015938486	30.3014635447397	31.538141341099
FBgn0039270	86.1899290630892	-0.267258106061627	0.232089165813241	-1.15153202057129	0.249513429847302	1	44.2041937396934	71.8030932772888	52.6966739141664	44.6501029220557	63.0270441730585	33.7908657226061
FBgn0032790	105.280972954565	0.222313809802649	0.193069982482876	1.15146749869502	0.249539958811708	1	86.0818509667713	67.2441667200006	85.9787837546925	105.536606906677	93.3285077177982	78.8453533527476
FBgn0032452	12.8671444798273	-0.772012743159901	0.671081158781304	-1.15040145749568	0.249978560124364	1	5.8163412815386	5.69865819661022	5.54701830675435	3.04432519923107	2.42411708357917	4.50544876301415
FBgn0001149	3940.3364249386	-0.20377883133145	0.177151981854819	-1.15030511766136	0.250018223736077	1	3364.17179724193	3347.39182468884	4509.72588339129	3164.06865706749	3370.73480471684	3206.75315707532
FBgn0265174	187.496514216259	-0.211647729249954	0.184015475428387	-1.15016266298929	0.250076881122316	1	86.0818509667713	84.3401413098313	91.5258020614469	77.1229050471871	82.4199808416919	66.4553692544587
FBgn0053514	55.3481574376811	-0.873018516710198	0.759520692559692	-1.1494334851734	0.250377279184392	1	2.32653651261544	6.83838983593226	2.77350915337718	5.07387533205179	0	1.12636219075354
FBgn0010403	690.918694062567	-0.211566849583051	0.184101492361817	-1.14918595644654	0.250479310407401	1	1262.14605809388	1340.32440784272	1591.9942540385	1244.1142314191	1215.69471741496	1161.2794186669
FBgn0013305	1819.50017533312	-0.198437380263391	0.172695621069944	-1.14905855188431	0.250531837822353	1	2118.31149473636	2139.27628700748	2759.64160761029	2082.31843627405	2155.04008730189	1876.51940979539
FBgn0041627	206.962218687909	-0.256933325015088	0.223607150239415	-1.14903894951477	0.250539920333303	1	98.8778017861562	109.414237374916	170.570812932696	107.566157039498	119.993795637169	87.8562508787759
FBgn0053513	105.954591341511	0.328563986076955	0.286007954823741	1.14879317353058	0.250641274914907	1	273.368040232314	281.513714912545	209.399941079977	303.417744856697	345.436684410032	312.00232683873
FBgn0040466	168.937917899753	-0.256421666001043	0.223241144715965	-1.14863085085545	0.250708230211401	1	63.9797540969246	79.7812147525431	83.2052746013153	71.034254648725	59.3908685476898	58.5708339191839
FBgn0028833	755.855473722327	-0.134664854942568	0.1172489927953	-1.14853741368741	0.250746777089124	1	823.593925465866	842.26168145899	888.909683657385	735.711923147509	810.867164457234	780.568998192201
FBgn0037090	508.116083795184	0.189055264617283	0.164610130689813	1.14850321681315	0.2507608858146	1	737.512074499095	908.366116539669	740.526943951706	865.603131648035	789.050110705021	1066.6649946436
FBgn0033903	126.955775789086	0.179224539598506	0.156063868910224	1.14840507831832	0.250801378237857	1	158.20448285785	150.44457639051	142.835721398925	161.349235559247	166.052020225173	184.72339928358
FBgn0004087	138.418076237713	-0.249822002646726	0.217652964503836	-1.14779967833759	0.251051270152115	1	61.6532175843092	79.7812147525431	88.7522929080697	70.0194795823146	53.3305758387418	68.7080936359658
FBgn0053113	2773.68881680689	0.122791378171046	0.107163180487982	1.14583551563045	0.251863216876712	1	3406.04945446901	3394.12082190105	2837.29986390485	3577.08210909651	3530.72653223307	3389.22383197739
FBgn0083953	149.925353638964	-0.265744082795951	0.231927040148697	-1.14580896917225	0.251874203194699	1	104.694143067695	93.4579944244076	122.034402748596	88.2854307777011	84.8440979252711	92.3616996417901
FBgn0085771	1574.55976065148	-0.983743899684312	0.859148166710518	-1.14502240451824	0.252199876592324	1	3622.41735014224	1085.02452063459	553.315076098747	616.983240377497	798.746579039338	1244.63022078266
FBgn0261836	17315.9664995525	0.278695952688713	0.243445462731278	1.1447983033323	0.252292718345172	1	49686.6770316717	34594.274448342	23841.0846824302	36370.5531552136	46120.0395736356	48674.6157112234
FBgn0033934	404.511659780958	-0.141375424997902	0.123527422445883	-1.14448615698945	0.252422075582231	1	305.93955140893	292.911031305765	346.688644172147	293.269994192593	281.197581695184	280.464185497631
FBgn0011283	505.663143435179	-0.199843113525952	0.174616816574149	-1.14446659518095	0.252430183772372	1	999.247432168332	1090.7231788312	1083.05532439379	967.08063828907	918.740374676507	876.309784406252
FBgn0020521	519.891599739301	0.127166326388059	0.111162269616925	1.14397022322668	0.252635986138391	1	1137.67635466895	1018.92008555391	923.5785480746	1126.4003237155	1021.76535072862	1217.59752820457
FBgn0005533	6897.08709127597	-0.16520072239174	0.14442083421376	-1.14388428297833	0.252671629971068	1	5241.68676292259	5658.76758923395	5698.17455561341	5145.92436176692	4871.26327945235	4784.78658632103
FBgn0032889	823.262435169533	0.267682546265755	0.234059650784904	1.14365096832409	0.252768415205637	1	884.083874793867	873.034435720686	1095.53611558399	1112.19347278575	993.888004267462	1326.85466070767
FBgn0261955	727.475692855053	0.201523894430936	0.176223121825712	1.14357237769427	0.252801022541746	1	1087.65581964772	1014.36115899662	869.495119583745	1134.51852424678	1158.72796595085	1125.23582856278
FBgn0000114	3640.98856932747	0.260337928104148	0.227672209697265	1.14347696827082	0.252840611951831	1	2690.63947683976	2358.10476175731	1705.70812932696	2534.90811589307	2818.03610966079	2739.3128479126
FBgn0033961	415.798117452488	-0.22058379008366	0.192940354263461	-1.14327451572133	0.252924632394957	1	353.633549917547	371.552514418986	478.430328957563	328.787121516956	334.528157533926	368.320436376407
FBgn0037490	26.3172343146441	0.415487423402482	0.363487384601272	1.14305871676469	0.253014213185854	1	9.30614605046176	13.6767796718645	19.4145640736402	21.3102763946175	21.8170537522126	12.3899840982889
FBgn0039722	128.829403423989	-0.155262073493165	0.135841711579195	-1.14296317153401	0.253053882240082	1	252.429211618775	247.321765732884	223.267486846863	231.368715141561	213.322303354967	204.997918717144
FBgn0034068	665.432505988508	-0.119915113644764	0.104937795217243	-1.14272568235796	0.253152503218702	1	620.021980612015	605.197500480005	543.607794061927	548.993310928003	550.274577972473	530.516591844916
FBgn0011708	556.646020588659	0.0918649641160014	0.0803964001123028	1.14265021801571	0.253183846534377	1	543.246275695705	573.285014578988	581.050167632519	607.850264779804	615.72573922911	584.581977001086
FBgn0030029	30.8898295117154	-0.421846565249359	0.369382601327632	-1.14203149724205	0.253440927586479	1	52.3470715338474	46.7289972122038	38.8291281472805	26.3841517266693	41.209990420846	36.0435901041132
FBgn0037144	149.340872831468	0.305092430585215	0.267170688779435	1.14193825669659	0.25347968517549	1	59.3266810716937	56.9865819661022	52.6966739141664	58.8569538518007	78.7838052163232	72.0871802082264
FBgn0031910	259.542916712727	1.25000124169883	1.09464265199306	1.14192630756978	0.253484652404712	1	1.16326825630772	10.2575847538984	16.6410549202631	44.6501029220557	0	21.4008816243172
FBgn0266406	95.453192046938	0.264044995834219	0.231234403255646	1.14189321362487	0.253498409848295	1	183.79638449662	202.872231799324	166.410549202631	212.087988879765	225.442888772863	227.525162532215
FBgn0024941	121.941057657607	0.391260050901224	0.342732625917135	1.141589744642	0.253624588812886	1	325.715111766162	338.500296878647	235.74827803706	413.013452029015	396.343143165195	371.699522948667
FBgn0034742	278.712921863294	0.222843739637059	0.195241135605451	1.14137698977222	0.253713075947158	1	401.327548426164	429.678828024411	313.406534331621	417.072552294657	450.885777545727	469.693033544225
FBgn0011592	319.702431452289	0.254114299303914	0.222698043185937	1.14107109190783	0.253840339959063	1	407.143889707702	461.591313925428	359.169435362344	485.062481744151	483.611358174045	496.72572612231
FBgn0039045	86.2287882179866	-0.277583435560556	0.243270435149051	-1.14104878955177	0.253849620242408	1	61.6532175843092	34.1919491796613	58.2436922209207	49.7239782541075	41.209990420846	34.9172279133597
FBgn0034261	541.114300587714	0.160160553583961	0.140397818118712	1.14076241162479	0.253968806590085	1	867.798119205559	878.733093917296	733.593171068263	941.711261628811	924.800667385455	906.721563556598
FBgn0000277	158.347484708527	1.14810345195056	1.00669378624175	1.14046939361444	0.254090796752518	1	9.30614605046176	30.7727542616952	115.100629865153	28.41370185949	167.264078766963	147.553446988713
FBgn0038961	419.811585182193	0.147711015493859	0.129541738175456	1.14025809421975	0.254178790870719	1	261.735357669237	249.601229011528	263.483369570832	311.53594538798	244.835825441497	299.612342740441
FBgn0262593	485.672478664315	0.379638809762588	0.333017204015114	1.13999758926977	0.254287305474752	1	1716.9839463102	1368.81769882577	722.499134454755	1414.59644257604	1745.36430017701	1796.54769425189
FBgn0034797	297.683500148922	0.193320960732379	0.169663626098513	1.13943669116284	0.254521059720788	1	608.389298048938	535.673870481361	488.137610994383	613.938915178266	585.424275684371	667.932779116848
FBgn0039641	57.0079930967797	0.253745010669373	0.222766603299724	1.13906217049945	0.254677224385513	1	53.5103397901551	36.4714124583054	49.9231647607892	46.6796530548764	60.6029270894794	59.6971961099375
FBgn0030838	335.022513316511	0.129310262523261	0.113523814962943	1.13905846597449	0.254678769401839	1	285.000722795391	341.919491796613	335.594607558638	335.890546981828	378.162265038351	339.035019416815
FBgn0260861	128.651548135514	0.193988059099302	0.170315484201634	1.1389924997638	0.254706282488599	1	100.041070042464	80.9209463918651	84.5920291780039	106.551381973087	93.3285077177982	103.625321549325
FBgn0020545	674.922715869247	-0.215110028715269	0.188869841546284	-1.13893264776502	0.254731247257904	1	531.613593132628	541.372528677971	662.868687657145	501.298882806716	503.004294842679	489.967552977789
FBgn0052190	1055.41436669896	0.166736998223523	0.146434030226536	1.13864924680129	0.254849479277943	1	1187.69688969018	1196.71822128815	1397.8486133021	1339.50308766167	1550.22287494888	1355.01371547651
FBgn0017551	381.610657742625	-0.221135066727577	0.194281623950013	-1.1382191595458	0.255028980235051	1	90.7349239920022	84.3401413098313	95.6860657915126	70.0194795823146	82.4199808416919	79.9717155435012
FBgn0058160	835.317380039422	0.12536722302783	0.110155676818818	1.13809135078923	0.255082339360536	1	861.981777924021	915.204506375601	771.035544638855	932.578286031118	926.012725927245	923.616996417901
FBgn0031435	156.380441523889	0.694011661375242	0.609856534269043	1.137991678989	0.255123956920527	1	3.48980476892316	2.27946327864409	5.54701830675435	7.1034254648725	4.84823416715835	5.63181095376769
FBgn0014343	32.7098334745403	0.269851878853834	0.237559915219513	1.13593187051141	0.255985078710241	1	54.6736080464629	52.427655408814	49.9231647607892	71.034254648725	61.814985631269	56.3181095376769
FBgn0259178	296.640476027918	0.129491414015621	0.113999616960419	1.13589341322595	0.256001175309754	1	348.980476892316	330.522175403393	331.434343828573	338.934872181059	392.706967539826	376.204971711682
FBgn0003655	975.167828944956	-0.866737042179583	0.763116952974023	-1.13578533251257	0.256046417108073	1	6.97960953784632	3.41919491796613	1.38675457668859	1.01477506641036	3.63617562536876	2.25272438150707
FBgn0031689	3611.73920857342	-0.142434684176068	0.125432949717786	-1.13554440437329	0.256147287859967	1	6938.89514887555	7468.66143247735	6241.78234967534	6196.21655550164	5951.20744018687	6562.18612333011
FBgn0037446	282.507278438215	-0.163542480983037	0.144046928884141	-1.1353416712867	0.256232188656159	1	219.857700442159	256.43961884746	206.6264319266	199.91068808284	214.534361896757	197.113383381869
FBgn0040623	172.419906169479	-0.206257536025586	0.181761160722285	-1.13477233093119	0.256470722182713	1	102.367606555079	134.488333440001	140.062212245547	116.699132637191	95.7526248013774	112.636219075354
FBgn0032138	1910.87730912339	-0.12579001585377	0.110868891617049	-1.13458350687098	0.256549866844604	1	1470.37107597296	1504.4457639051	1615.56908184221	1409.52256724399	1322.35586909244	1473.28174550563
FBgn0000047	64.9253199840264	-0.409055051769124	0.360623704873942	-1.1342988445868	0.256669213671701	1	63.9797540969246	58.1263136054242	63.7907105276751	43.6353278556454	38.7858733372668	57.4444717284304
FBgn0027335	826.940239033664	-0.141730744414102	0.124977119687969	-1.1340535353028	0.256772092372413	1	1092.30889267295	1163.66600374781	1058.09374201339	959.977212824198	1036.3100532301	1009.22052291517
FBgn0026582	114.855290783014	-0.220445209030516	0.194409979458052	-1.13391920335078	0.256828441124537	1	60.4899493280015	64.9647034413565	77.658256294561	58.8569538518007	52.1185172969523	61.9499204914446
FBgn0003390	103.416940096643	0.222871881367868	0.196554988610973	1.13389073939498	0.256840382114111	1	173.32697018985	167.54055098034	140.062212245547	203.969788348482	149.083200640119	208.377005289404
FBgn0015520	187.972735282926	0.230760411778639	0.203551759099539	1.13366945488196	0.256933226911737	1	152.388141576311	125.370480325425	120.647648171907	155.260585160785	157.567610432646	155.437982323988
FBgn0261674	253.830099610616	0.142700302571088	0.125899442645556	1.13344665847991	0.257026729589323	1	218.694432185851	312.28646917424	285.671442797849	304.432519923107	289.681991487711	306.370515884962
FBgn0002773	2365.42256161073	-0.179446670007926	0.158336356790127	-1.13332574808312	0.257077482869686	1	2995.41575999238	3271.02980485427	3695.70094687509	3269.60526397417	2695.61819694004	2829.42182317289
FBgn0261380	176.778736410121	0.177077149680775	0.156262950044243	1.13319983803351	0.257130342194102	1	101.204338298772	80.9209463918651	85.9787837546925	101.477506641036	98.1767418849566	103.625321549325
FBgn0011274	600.321310520663	0.174029100446078	0.153595857188592	1.13303251553456	0.257200598888264	1	1210.96225481634	1145.43029751865	1030.35865047962	1209.61187916115	1322.35586909244	1290.81107060355
FBgn0040532	1983.55041960137	-0.302712762077019	0.267183177623816	-1.13297837374787	0.257223335222311	1	2687.14967207083	2963.30226223731	3935.60948864221	2743.95177957361	2593.80527942972	2432.94233202764
FBgn0001995	234.305832893579	-0.164342177678259	0.145080050368477	-1.13276895934941	0.257311289959525	1	150.061605063696	128.789675243391	176.117831239451	138.009409031809	144.234966472961	121.647116601382
FBgn0024558	605.688622576093	-0.166845741781394	0.147296808673845	-1.13271796777916	0.257332709746076	1	196.592335316005	172.099477537629	217.720468540108	164.393560758478	197.565542311703	159.943431087002
FBgn0030961	89.2706523562001	0.272542797880971	0.240630547709678	1.13261928078141	0.257374168238494	1	210.551554391697	192.614647045425	140.062212245547	221.220964477458	213.322303354967	223.0197137692
FBgn0266348	276.279159424268	0.396343456799824	0.350005712909181	1.13239139300182	0.257469921796998	1	1126.04367210587	865.056314245431	373.03698112923	920.400985234194	1117.51797553	1075.67589216963
FBgn0015828	383.168351327703	-0.173010709313199	0.152784082545389	-1.13238700282669	0.257471766697079	1	186.122921009235	178.937867373561	248.229069227257	194.836812750789	175.74848855949	170.080690803784
FBgn0040923	863.223583519164	-0.19317211105701	0.170594863334002	-1.13234424109714	0.257489737101928	1	1461.0649299225	1610.44080636205	1737.6034845908	1528.251250014	1412.04820118487	1264.90474021622
FBgn0032596	969.798448518667	-0.197310819809482	0.174258697619096	-1.1322867811211	0.257513885742211	1	365.266232480624	355.596271468478	481.20383811094	363.289473774908	339.376391701084	343.540468179829
FBgn0027330	241.347926760131	0.28368172168645	0.250623203354862	1.13190525812879	0.257674267838061	1	100.041070042464	83.2004096705092	63.7907105276751	81.1820053128286	104.237034593905	117.141667838368
FBgn0034315	483.552656504706	-0.141176677480517	0.124729920157502	-1.13185895815733	0.257693735825345	1	343.164135610777	368.13331950102	414.639618429888	342.993972446701	335.740216075716	340.161381607568
FBgn0267571	12.7261517552707	-0.389785900381146	0.344382219700162	-1.13184095485683	0.257701306041245	1	39.5511207144625	35.3316808189834	22.1880732270174	22.3250514610279	27.8773464611605	24.7799681965778
FBgn0032587	519.505546702827	-0.238119615731192	0.21044858583144	-1.13148593890726	0.257850618371339	1	852.675631873559	691.817105068481	732.206416491575	614.953690244676	722.386890906594	593.592874527114
FBgn0010383	335.364916551637	-0.230346347706428	0.203585773390084	-1.13144619032426	0.257867339533498	1	636.307736200323	677.000593757294	483.977347264317	527.683034533386	505.428411926258	500.104812694571
FBgn0030794	215.064657867334	-0.259343461217286	0.229251813579119	-1.13126023811272	0.257945574627056	1	53.5103397901551	54.7071186874581	47.149655607412	41.6057777228246	48.4823416715835	40.5490388671274
FBgn0051810	21.3580764117816	-0.407545845109967	0.360281632417463	-1.1311868506184	0.257976455248136	1	24.4286333824621	20.5151695077968	26.3483369570832	17.2511761289761	23.0291122940022	13.5163462890425
FBgn0005674	730.329336351527	0.212687827180513	0.188058767036051	1.13096470072964	0.258069949015177	1	789.859146032942	647.367571134921	653.161405620325	757.022199542126	801.170696122917	865.046162498717
FBgn0020389	341.636769422711	0.25528583154793	0.225732452570854	1.13092215426047	0.258087857757653	1	533.940129645244	470.709167040004	407.705845546445	553.052411193645	583.000158600792	550.79111127848
FBgn0037648	302.02133486702	-0.125128757001245	0.110665935245106	-1.13068901215271	0.258186007685607	1	279.184381513853	250.74096065085	325.887325521818	282.107468462079	253.320235234024	244.420595393518
FBgn0034399	246.286122619627	-0.181644937678809	0.160687190185668	-1.13042575123085	0.258296868366978	1	165.184092395696	190.335183766781	221.880732270174	183.674287020275	153.931434807278	168.954328613031
FBgn0038306	204.101227931733	0.24571108066713	0.217454680821592	1.12994155719609	0.25850085140197	1	69.7960953784632	69.5236299986447	55.4701830675435	77.1229050471871	67.8752783402169	86.7298886880224
FBgn0001263	1466.6358071287	-0.205962676134055	0.182279010646369	-1.12993084285296	0.258505366442045	1	2668.53737996991	3093.23166912003	3057.79384159834	2527.8046904282	2564.71587442677	2553.46308643827
FBgn0031536	220.793809871646	0.145794918900634	0.129040842683939	1.12983545262278	0.258545566436105	1	216.367895673236	188.055720488137	194.145640736402	226.29483980951	229.079064398232	207.250643098651
FBgn0004404	1926.73677091787	-0.21036000871765	0.186193769029182	-1.12979080779379	0.258564382449458	1	1608.79999847358	1706.1782640651	1704.32137475028	1538.3990006781	1407.19996701771	1392.18366777137
FBgn0001257	73.3691329615908	0.306265857637762	0.271113080159203	1.12966094243006	0.258619120912251	1	70.9593636347709	62.6852401627124	76.2715017178724	74.0785798479561	88.4802735506399	96.8671484048042
FBgn0037171	149.202054864294	0.328194370998207	0.290639441823541	1.12921484069415	0.258807214699659	1	465.307302523088	429.678828024411	289.831706527915	463.752205349533	528.45752422026	496.72572612231
FBgn0051973	112.98416361942	0.247642829180852	0.219366892826405	1.12889792069409	0.258940898039711	1	311.755892690469	256.43961884746	209.399941079977	268.915392598745	311.499045239924	344.666830370582
FBgn0036008	179.677163669278	0.26529531693744	0.235037929616253	1.12873406164949	0.259010035897533	1	40.7143889707702	35.3316808189834	27.7350915337718	35.5171273243625	44.8461660462147	46.180849820895
FBgn0029957	222.315508577728	-0.182519194301295	0.161765091821806	-1.12829778196121	0.259194179901394	1	219.857700442159	232.505254421697	183.051604122894	192.807262617968	195.141425228124	173.459777376045
FBgn0036291	74.7286426468105	0.312967075603265	0.277921095815941	1.12610046633716	0.260122996677634	1	31.4082429203084	49.0084604908479	40.2158827239691	51.7535283869282	49.6944002133731	48.4335742024021
FBgn0016032	76.3711774042622	-0.213129269751802	0.189270972307939	-1.12605365288157	0.260142809999826	1	108.183947836618	112.833432292882	124.807911901973	100.462731574625	94.5405662595878	102.498959358572
FBgn0031070	86.2212103131191	1.03208786549232	0.916706239729365	1.12586543078077	0.260222483644988	1	3.48980476892316	0	1.38675457668859	4.05910026564143	2.42411708357917	3.37908657226061
FBgn0032286	535.984017801835	0.295334491675886	0.262352135741611	1.12571788615725	0.260284950486543	1	1206.30918179111	1216.09365915662	651.774651043637	1205.5527788955	1225.39118574927	1343.75009356897
FBgn0040060	1896.29709087673	1.29821438062544	1.15363355478361	1.12532647411504	0.260450715197923	1	1.16326825630772	17.0959745898307	0	6.08865039846214	0	39.4226766763738
FBgn0031495	300.478914063625	-0.135725654427619	0.120626190015008	-1.1251756721383	0.260514599982673	1	282.674186282776	276.954788355257	273.190651607652	258.767641934641	236.35141564897	262.442390445574
FBgn0035189	1380.96070563535	-0.203909613092041	0.181320943002663	-1.1245783841365	0.260767737756027	1	2696.4558181213	2598.58813765426	2006.63387246839	2067.0968102779	1862.9339787306	2410.41508821257
FBgn0036364	161.757245914349	-0.253986504752628	0.225909657895148	-1.12428351722135	0.260892768578459	1	188.449457521851	243.902570814917	228.814505153617	189.762937418737	184.232898352017	180.217950520566
FBgn0035264	46.6366764298097	0.315320354413726	0.280677810959014	1.1234245889846	0.261257211543545	1	34.8980476892316	28.4932909830511	34.6688644172147	36.5319023907729	49.6944002133731	36.0435901041132
FBgn0039528	632.556576091955	0.211427784636089	0.188349247731604	1.12253054993547	0.261636925718538	1	899.206362125868	778.436709656956	705.858079534492	930.548735898297	888.438911131768	941.638791469957
FBgn0031736	458.676772659063	0.237333551846477	0.211475209235831	1.12227599965067	0.261745107447827	1	796.838755570788	667.882740642718	578.276658479141	749.918774077254	839.956569460184	819.991674868575
FBgn0034791	296.63323855661	0.154152253082045	0.137363205476089	1.12222376107027	0.26176731222737	1	169.837165420927	168.680282619663	155.316512589122	205.999338481302	163.627903141594	179.091588329812
FBgn0265597	432.918785186873	0.242104227121137	0.215754131063813	1.12213020407721	0.261807083261411	1	1306.35025183357	993.845989488822	750.234225988526	1166.99132637191	1258.11676637759	1184.93302467272
FBgn0002780	2757.91036158235	0.121495133526795	0.108338122023948	1.12144396872542	0.26209892923229	1	891.063484331714	782.995636214244	705.858079534492	810.805278061875	919.952433218297	862.79343811721
FBgn0032433	103.024791218872	-0.32757050196429	0.292124509621588	-1.1213386455954	0.262143741523941	1	24.4286333824621	26.213827704407	29.1218461104604	20.2955013282071	12.1205854178959	30.4117791503455
FBgn0020412	411.926762895722	0.282659216693082	0.252084212477094	1.12128884992656	0.26216493014714	1	504.858423237551	474.12836195797	409.092600123134	532.756909865437	587.84839276795	568.812906330536
FBgn0040089	107.816606983281	0.19208853310503	0.171316920802023	1.12124670584648	0.262182863856714	1	160.531019370465	141.326723275933	145.609230552302	165.408335824888	185.444956893807	161.069793277756
FBgn0032032	86.8203673335294	-0.199478598458631	0.177917727624573	-1.12118449983553	0.262209336134589	1	75.6124366600018	90.0387995064415	94.299311214824	78.1376801135975	79.9958637581128	67.5817314452123
FBgn0029507	643.319530574685	-0.27380436742776	0.244268806932404	-1.120914171835	0.262324397877585	1	543.246275695705	452.473460810851	718.338870724689	435.338503490043	534.517816929208	447.165789729154
FBgn0024806	691.843193132011	0.187853979336118	0.167648257835461	1.12052449432841	0.262490320612568	1	827.083730234789	821.746511951194	744.687207681772	850.381505651879	935.709194261561	941.638791469957
FBgn0002543	141.833194459622	0.253679648641855	0.226441499253865	1.12028779829555	0.262591139976308	1	259.408821156622	264.417740322714	245.45556007388	273.989267930796	330.891981908557	313.128689029483
FBgn0036487	349.443715910456	-0.152333581585616	0.136038474531395	-1.11978307688581	0.262806212560597	1	237.306724286775	243.902570814917	289.831706527915	225.280064743099	227.867005856442	238.78878443975
FBgn0033260	524.41343078065	0.143588746795722	0.128257790595817	1.11953235845313	0.262913094245378	1	421.103108783395	379.530635894241	382.74426316605	406.924801630553	435.129016502462	466.313946971965
FBgn0034166	28.8349308961511	0.315675481051662	0.282085164534726	1.11907863560404	0.263106593333277	1	60.4899493280015	55.8468503267801	37.4423735705919	61.9012790510318	66.6632197984273	64.2026448729516
FBgn0029133	1150.8296856983	-0.135997274746867	0.121554179616928	-1.11882022630119	0.26321684101719	1	630.491394918784	649.647034413565	733.593171068263	608.865039846214	620.573973396269	601.477409862389
FBgn0031635	350.951704364299	0.1423890720885	0.127271371356267	1.11878319979686	0.263232640607347	1	282.674186282776	311.146737534918	313.406534331621	321.683696052083	338.164333159295	341.287743798322
FBgn0030793	126.511908269027	-0.241445346039409	0.215820307935383	-1.11873321073982	0.263253972490363	1	63.9797540969246	71.8030932772888	70.724483411118	60.8865039846214	63.0270441730585	50.6862985839092
FBgn0000535	241.968876940556	0.322957708925885	0.288717761852638	1.11859314388397	0.263313749721957	1	834.063339772635	631.411328184412	399.385318086314	721.505072217764	781.777759454284	831.255296776111
FBgn0032515	657.41139337015	-0.11256673654937	0.100635821370609	-1.11855535152661	0.263329880213564	1	900.369630382176	957.374577030517	969.341449105323	842.263305120596	907.831847800401	865.046162498717
FBgn0030004	35.5833714911036	0.322967030956305	0.288772222428404	1.11841446604643	0.263390018805548	1	54.6736080464629	49.0084604908479	26.3483369570832	55.8126286525696	52.1185172969523	56.3181095376769
FBgn0037943	349.726738085186	-0.148329158002463	0.132650217642853	-1.11819762257627	0.263482599459674	1	250.10267510616	280.373983273223	299.538988564735	259.782417001051	227.867005856442	259.063303873314
FBgn0032231	433.832956855529	-0.22417032546847	0.200483077218808	-1.11815086130093	0.263502566985397	1	164.020824139389	239.343644257629	255.1628421107	213.102763946175	170.900254392332	177.965226139059
FBgn0015277	343.281410475168	-0.18750770183029	0.167718534568558	-1.11799034204918	0.263571118232359	1	460.654229497857	486.665409990513	531.127002871729	450.560129486199	406.039611499512	440.407616584633
FBgn0086708	295.667639323838	0.207977420381714	0.186044480411127	1.11789083944936	0.263613617924748	1	449.02154693478	408.023926877292	413.252863853199	458.678330017481	545.426343805314	464.061222590457
FBgn0037356	272.322664038325	-0.171893291934539	0.15377311587489	-1.11783708716933	0.263636578642049	1	204.735213110159	233.644986061019	280.124424491095	205.999338481302	223.018771689284	207.250643098651
FBgn0030053	275.273749743518	-0.139593193375751	0.12489081072131	-1.11772189298417	0.263685789408222	1	236.143456030467	282.653446551867	251.002578380635	249.634666336948	204.83789356244	243.294233202764
FBgn0030943	162.282093159852	-0.313599055899511	0.280578611528593	-1.11768696192138	0.263700713152774	1	26.7551698950776	35.3316808189834	31.8953552638375	26.3841517266693	27.8773464611605	21.4008816243172
FBgn0003380	1077.66122237119	0.337992468459935	0.302429870274195	1.11758956928923	0.263742325692749	1	4192.41879573302	3369.04672583596	1615.56908184221	3381.23052127931	4055.54788082796	4165.28738140658
FBgn0039081	388.168421287185	-0.14176504768328	0.126850067638861	-1.11757959867141	0.263746586052247	1	539.756470926782	576.704209496954	553.315076098747	519.564834002103	477.551065465097	515.87388336512
FBgn0036146	118.480910538069	-0.206760812977641	0.185010000031047	-1.11756560695608	0.263752564672286	1	147.73506855108	169.820014258985	220.493977693486	149.171934762322	161.203786058015	154.311620133235
FBgn0002069	1496.39491089911	-0.173949195628928	0.155804539136836	-1.1164578169071	0.264226216940259	1	1008.55357821879	835.423291623058	1130.2049800012	869.662231913676	979.343301765987	786.200809145969
FBgn0031161	321.611098029773	0.114741049844118	0.102778381876295	1.11639284204942	0.264254016113462	1	318.735502228315	315.705664092206	377.197244859296	342.993972446701	381.79844066372	368.320436376407
FBgn0039632	252.731883581298	-0.199974556911904	0.179146193076502	-1.11626461873241	0.264308881745281	1	237.306724286775	254.160155568816	255.1628421107	217.161864211816	206.04995210423	226.398800341461
FBgn0259714	212.308744355715	-0.211662380339047	0.189646917600158	-1.11608658351783	0.26438507447342	1	473.450180317242	457.03238736814	427.120409620085	403.880476431322	390.282850456247	378.457696093189
FBgn0038167	213.607359778213	0.202769992635702	0.181811855551091	1.1152737648548	0.264733124271171	1	145.408532038465	167.54055098034	141.448966822236	175.556086488992	178.172605643069	170.080690803784
FBgn0052521	1806.04339555293	0.16187100251882	0.145174423895474	1.11501046930531	0.26484593538273	1	4119.13289558564	3754.27601992681	3218.65737249421	4080.41054203605	4033.73082707575	4297.07175772475
FBgn0037000	97.0964807383287	0.198545590231999	0.178259140056164	1.11380314170395	0.265363648882555	1	90.7349239920022	82.0606780311872	105.393347828333	100.462731574625	121.205854178959	96.8671484048042
FBgn0085390	172.116798413026	0.278618292038774	0.25023719789203	1.11341676771409	0.265529476843199	1	445.531742165857	410.303390155936	285.671442797849	427.22030295876	522.397231511312	437.028530012373
FBgn0027500	547.559084164421	-0.652689399236796	0.586264791809169	-1.11330137568495	0.265579015817348	1	4.65307302523088	10.2575847538984	9.70728203682012	5.07387533205179	4.84823416715835	5.63181095376769
FBgn0033347	47.6872905956156	0.257605706278692	0.231395011133778	1.1132725161899	0.265591406487617	1	108.183947836618	87.7593362277974	73.4979925644952	112.64003237155	110.297327302852	100.246234977065
FBgn0040918	603.192096607316	-0.134638542589746	0.120945608096093	-1.11321564056112	0.265615826900866	1	424.592913552318	379.530635894241	395.225054356248	341.97919738029	390.282850456247	361.562263231886
FBgn0038702	97.9290143646441	-1.61087176768163	1.44737125746201	-1.1129637675038	0.265723991001386	1	2.32653651261544	1.13973163932204	0	1.01477506641036	0	0
FBgn0287873	1407.25525921172	0.17629767853211	0.158427013512495	1.11280061792117	0.265794069969703	1	1539.00390309511	1487.34978931527	1377.04729465177	1570.87180280323	1739.30400746806	1667.01604231524
FBgn0051720	46.8174083299562	-0.404940937046896	0.363929521366729	-1.11269054383428	0.265841358176651	1	17.4490238446158	15.9562429505086	16.6410549202631	12.1773007969243	10.9085268761063	14.642708479796
FBgn0260659	770.327756650298	-0.103104671726707	0.0926667377256645	-1.11263948917619	0.265863293399937	1	852.675631873559	812.628658836617	805.70440905607	769.199500339051	787.838052163232	744.525408088088
FBgn0031216	856.041033142841	0.218594977766879	0.196474518814894	1.11258690992304	0.265885884955677	1	1170.24786584557	1106.6794217817	779.356072098987	1122.34122344985	1213.27060033138	1223.22933915834
FBgn0263980	706.754091935429	0.235884287993781	0.212098872314723	1.11214305582806	0.266076646962832	1	2041.53578982005	1624.11758603391	1077.50830608703	1650.02425798324	1941.71778394692	1997.04016420602
FBgn0002571	223.443860347709	-1.61083271177061	1.44850867160013	-1.11206287083609	0.266111119345863	1	3.48980476892316	0	0	0	0	1.12636219075354
FBgn0032483	9.83602815255903	-0.650882173376548	0.585384829604543	-1.11188766852098	0.266186451385689	1	9.30614605046176	2.27946327864409	15.2543003435745	8.11820053128286	4.84823416715835	3.37908657226061
FBgn0033297	452.532861371764	-1.61337393371807	1.45113792745171	-1.11179916339948	0.266224511664104	1	1.16326825630772	0	2.77350915337718	1.01477506641036	0	0
FBgn0037235	231.355119530864	-0.172133501040585	0.154835398008964	-1.11171930484926	0.266258856830672	1	100.041070042464	118.532090489493	117.87413901853	111.625257305139	79.9958637581128	104.751683740079
FBgn0035636	50.4092545071322	0.268818108479896	0.241943607699807	1.11107754007468	0.266534974542379	1	89.5716557356945	87.7593362277974	76.2715017178724	110.610482238729	101.812917510325	93.4880618325436
FBgn0031909	123.465365237051	-0.205994446645612	0.185433547618807	-1.11088014704368	0.266619942012157	1	73.2859001473864	83.2004096705092	84.5920291780039	56.82740371898	77.5717466745336	75.466266780487
FBgn0267181	14.0474807842459	0.376876236881942	0.339453890738469	1.11024279633991	0.266894415677503	1	31.4082429203084	35.3316808189834	26.3483369570832	41.6057777228246	47.2702831297939	32.6645035318526
FBgn0266974	16.0859949146554	0.384121099853296	0.345989060716896	1.11021169009619	0.266907816484698	1	41.8776572270779	37.6111440976275	24.9615823803946	38.5614525235936	43.6341075044251	55.1917473469233
FBgn0263873	581.860974760841	0.226196365824598	0.203759701422456	1.11011335531761	0.266950182901802	1	1477.3506855108	1377.93555194035	1040.06593251644	1394.30094124783	1568.40375307573	1596.05522429776
FBgn0030969	187.560589975849	0.217147653656506	0.195612354793721	1.11009171115748	0.26695950866222	1	66.3062906095401	71.8030932772888	65.1774651043637	77.1229050471871	71.5114539655857	87.8562508787759
FBgn0283651	94.505646818897	0.24879188577642	0.224181889661425	1.10977691441607	0.267095169607587	1	229.163846492621	239.343644257629	163.637040049253	265.871067399514	258.168469401182	228.651524722968
FBgn0001404	541.008337371036	0.174476286749465	0.157284983319903	1.10930034811141	0.267300634981953	1	681.675198196324	702.074689822379	664.255442233834	781.376801135975	791.474227788601	738.893597134321
FBgn0053306	205.108930486794	-1.61031689889694	1.45279770053119	-1.10842472995941	0.267678429591066	1	3.48980476892316	0	0	0	0	1.12636219075354
FBgn0262481	107.385940212931	0.39202021789046	0.353794826515991	1.10804395234067	0.267842834525695	1	87.245119223079	107.134774096272	152.543003435745	144.098059430271	149.083200640119	161.069793277756
FBgn0037816	56.4912944456208	-0.227500789990306	0.205461394435507	-1.1072678184403	0.268178153731114	1	79.102241428925	59.2660452447463	61.0172013742979	65.9603793166732	52.1185172969523	51.8126607746627
FBgn0264001	791.338432040777	0.327209809114856	0.295545257746359	1.10713943309377	0.268233648844746	1	3000.06883301761	2383.17885782239	1238.37183698291	2596.8093949441	2896.81991487711	2815.90547688384
FBgn0032981	47.4412597110724	0.25805234288331	0.233085658926482	1.10711377127111	0.26824474222302	1	38.3878524581548	38.7508757369495	40.2158827239691	47.6944281212868	52.1185172969523	40.5490388671274
FBgn0031092	187.01949556407	0.149498293309	0.135070493602105	1.10681681337003	0.268373137415721	1	184.959652752928	199.453036881358	169.184058356008	226.29483980951	203.625835020651	184.72339928358
FBgn0000179	166.493899042459	0.35933720472071	0.324663716950327	1.10679816055851	0.26838120370958	1	511.838032775397	468.42970376136	285.671442797849	528.697809599796	567.243397557527	529.390229654163
FBgn0261394	1268.43818255773	-0.172866441384036	0.156220607866471	-1.10655337823159	0.268487073756834	1	627.001590149861	674.72113047865	725.272643608132	572.333137455441	584.212217142581	640.900086538763
FBgn0030658	395.742056777342	0.140151058939644	0.126655966098829	1.10654920771979	0.268488877780476	1	202.408676597543	204.011963438646	214.946959386731	232.383490207972	241.199649816128	210.629729670912
FBgn0034389	376.222830248495	0.143907690236733	0.13008030294663	1.10629885522158	0.268597187131808	1	478.103253342473	509.460042776954	407.705845546445	493.180682275434	538.153992554577	513.621158983613
FBgn0037354	614.310221728285	-0.237569988546228	0.214884626559869	-1.10556996258659	0.268912696898567	1	431.572523090164	446.774802614241	728.046152761509	463.752205349533	461.794304421833	434.775805630865
FBgn0039680	273.066940709603	0.272952590970646	0.24691212360238	1.10546451501993	0.268958362179663	1	37.2245842018471	46.7289972122038	36.0556189939033	50.7387533205179	52.1185172969523	42.8017632486344
FBgn0045035	445.183424259569	0.207670404735632	0.187866848331086	1.10541272491912	0.268980792427618	1	389.694865863086	346.478418353901	282.897933644472	368.36334910696	372.101972329403	438.154892203126
FBgn0002873	672.413785050894	-0.580779576057319	0.525447805178017	-1.10530402893311	0.2690278727412	1	17.4490238446158	9.11785311457635	8.32052746013153	5.07387533205179	10.9085268761063	7.88453533527476
FBgn0032850	50.9840627244181	0.259161466249747	0.23450164869616	1.10515839735327	0.269090960114101	1	81.4287779415404	61.5455085233904	55.4701830675435	58.8569538518007	83.6320393834815	96.8671484048042
FBgn0037492	91.4004392689786	0.25605832741512	0.231712047694745	1.10507127256693	0.269128707290102	1	45.3674619960011	33.0522175403393	37.4423735705919	35.5171273243625	55.754692922321	48.4335742024021
FBgn0038056	242.052811352242	-0.155490458606024	0.140717569401959	-1.10498254956256	0.269167150635763	1	189.612725778158	221.107938028477	209.399941079977	184.689062086685	175.74848855949	195.987021191116
FBgn0002872	272.302553198363	0.273679942277718	0.247770690119494	1.10456947973034	0.269346181871439	1	46.5307302523088	49.0084604908479	55.4701830675435	70.0194795823146	66.6632197984273	45.0544876301415
FBgn0033294	345.279042908959	-1.13485555434816	1.02775079371443	-1.10421277345517	0.26950084995938	1	4.65307302523088	0	2.77350915337718	1.01477506641036	1.21205854178959	1.12636219075354
FBgn0030218	479.617717385779	-0.16096530344833	0.145804892483667	-1.1039773817354	0.269602949343877	1	858.491973155098	959.654040309161	761.328262602035	706.283446221609	786.625993621442	816.612588296315
FBgn0264386	847.579117678708	0.298296637062701	0.270301526598357	1.10356993101982	0.269779740740717	1	2467.29197162867	2273.76462044748	1450.54528721626	2359.35202940408	2524.71794254771	2731.42831257733
FBgn0039537	384.077179592041	-0.158435289040036	0.143572494836161	-1.10352118085596	0.269800898586782	1	289.653795820622	307.727542616952	285.671442797849	278.048368196438	265.44082065192	247.799681965778
FBgn0000251	277.345810817076	-1.6095926397082	1.45896393607677	-1.10324361000758	0.269921387591649	1	3.48980476892316	0	0	0	0	1.12636219075354
FBgn0039645	22.2530667443218	0.69523728666471	0.630425761880539	1.10280595861254	0.270111439930797	1	3.48980476892316	2.27946327864409	5.54701830675435	5.07387533205179	8.48440979252711	4.50544876301415
FBgn0036519	206.780166645605	0.203023406268446	0.184121075761402	1.10266250307781	0.270173756190385	1	102.367606555079	104.855310817628	112.327120711776	116.699132637191	122.417912720748	128.405289745903
FBgn0260960	1536.84290217116	0.153786252344634	0.139588870700458	1.10170855006515	0.270588398649779	1	2504.51655583052	2383.17885782239	1962.25772601435	2427.34195885357	2501.68883025371	2694.25836028246
FBgn0032429	165.546163674052	0.203789371463998	0.185016747348264	1.10146445867626	0.270694564758863	1	126.796239937542	101.436115899662	144.222475975613	157.290135293605	147.87114209833	121.647116601382
FBgn0015032	24.2724067447979	-0.311694765318795	0.283006395562989	-1.10137004041458	0.270735639081508	1	48.8572667649242	44.4495339335597	73.4979925644952	33.4875771915418	52.1185172969523	48.4335742024021
FBgn0051721	232.754627359467	0.289763364687787	0.263117296703861	1.10127068162271	0.270778867271893	1	554.878958258783	469.569435400682	271.803897030963	481.003381478509	572.091631724685	533.895678417177
FBgn0284246	284.109957837299	0.185770908133919	0.168744750916314	1.10089888500323	0.270940667397591	1	119.816630399695	104.855310817628	98.4595749448898	115.684357570781	123.629971262538	129.531651936657
FBgn0032400	6209.0155743394	-0.1513001171443	0.137498543612432	-1.1003761434068	0.27116826847668	1	6132.7502472543	6849.78715232548	6555.18888400696	5981.08424142264	5436.0825599263	6174.71752971089
FBgn0030985	603.576187891521	-0.281293250677209	0.25572598159023	-1.09997916100659	0.271341201636993	1	829.410266747405	882.152288835262	1142.6857711914	842.263305120596	772.081291119967	733.261786180553
FBgn0038983	112.304244247703	-0.243063955176813	0.221034455204926	-1.09966545691468	0.271477910592228	1	251.265943362468	185.776257209493	177.504585816139	181.644736887454	179.384664184859	158.817068896249
FBgn0036919	400.482981196089	0.124437691714147	0.113183771139085	1.09943051430255	0.271580327011285	1	407.143889707702	363.574392943732	343.91513501877	431.279403224402	387.858733372668	396.479491145245
FBgn0036738	346.390846268982	1.71740940659338	1.56225468229271	1.09931461627817	0.271630859139342	1	0	0	0	1.01477506641036	0	1.12636219075354
FBgn0267576	16.408405794774	0.36485222353561	0.331927777712785	1.09919159538167	0.271684503920215	1	32.5715111766162	29.6330226223731	20.8013186503288	32.4728021251314	26.6652879193709	48.4335742024021
FBgn0034731	85.186804171435	0.275631103733694	0.250760160920249	1.09918219354371	0.271688604006139	1	222.184236954775	211.9900849139	170.570812932696	239.486915672844	259.380527942972	234.283335676736
FBgn0032087	475.14206607037	-1.60902223964097	1.46391082669501	-1.099125855414	0.271713173618957	1	3.48980476892316	0	0	1.01477506641036	0	0
FBgn0038583	119.822035233843	-0.184833819109673	0.168174730359355	-1.09905821590866	0.271742673882793	1	111.673752605541	98.0169209816958	98.4595749448898	90.3149809105218	95.7526248013774	85.6035264972688
FBgn0028872	41.5727009930758	-1.13244511932051	1.03056056023193	-1.09886324299627	0.271827721554536	1	5.8163412815386	1.13973163932204	0	1.01477506641036	1.21205854178959	1.12636219075354
FBgn0024995	111.419273987552	-0.24433398113015	0.222419922458058	-1.09852561061037	0.271975040747658	1	134.939117731696	125.370480325425	101.233084098267	98.4331814418046	103.024976052115	104.751683740079
FBgn0015359	221.75923548498	0.196441053285824	0.178832528455885	1.09846376932641	0.27200202988656	1	73.2859001473864	86.6196045884753	120.647648171907	114.66958250437	101.812917510325	101.372597167818
FBgn0015240	326.192676994183	-0.123653252547417	0.112570207520977	-1.0984545135921	0.272006069486608	1	297.796673614776	286.072641469833	288.444951951226	272.974492864386	254.532293775813	272.579650162356
FBgn0262721	15.1352675737813	-0.412991517656851	0.37598432116153	-1.09842749926644	0.272017859933644	1	38.3878524581548	21.6549011471188	27.7350915337718	19.2807262617968	27.8773464611605	19.1481572428101
FBgn0046225	121.462539567708	0.246665510397556	0.224568161178068	1.09839929713797	0.272030169172459	1	218.694432185851	199.453036881358	159.476776319188	193.822037684378	238.775532732549	254.557855110299
FBgn0035407	76.3151304454336	-0.272739257905844	0.248322262570245	-1.09832785463081	0.272061353024735	1	36.0613159455393	35.3316808189834	36.0556189939033	28.41370185949	24.2411708357917	36.0435901041132
FBgn0031091	194.132246869538	-1.13945593112053	1.03748626194084	-1.09828531993178	0.272079920105438	1	2.32653651261544	0	5.54701830675435	1.01477506641036	1.21205854178959	1.12636219075354
FBgn0052726	275.01430417824	-0.153694987556443	0.139980346472214	-1.09797547605693	0.272215198116729	1	492.062472418166	498.062726383733	551.928321522058	506.372758138768	452.097836087516	425.764908104837
FBgn0052834	219.059837172704	1.71930046526143	1.56636554819884	1.09763679828023	0.27236311768007	1	0	0	0	0	2.42411708357917	0
FBgn0015372	163.102933024204	-0.247664422461327	0.225647207157217	-1.09757362203366	0.272390716373544	1	132.61258121908	148.165113111866	148.382739705679	117.713907703601	115.145561470011	128.405289745903
FBgn0014861	577.348627820328	0.322146459233932	0.293518858071126	1.09753240848283	0.272408721642644	1	30.2449746640007	12.5370480325425	23.574827803706	21.3102763946175	30.3014635447397	31.538141341099
FBgn0032083	33.9985963315252	0.260151201032793	0.237124981495789	1.09710583588349	0.272595129414257	1	105.857411324003	83.2004096705092	61.0172013742979	113.65480743796	95.7526248013774	91.2353374510365
FBgn0034642	62.2025364073543	1.71646281317956	1.56510450325257	1.09670811732535	0.272769006875574	1	0	0	0	2.02955013282071	0	0
FBgn0039840	46.4042356929845	1.71806601532639	1.56696445579089	1.09642947482126	0.272890871001067	1	0	0	0	0	0	2.25272438150707
FBgn0264753	196.443769888483	0.18630601231743	0.16993782286938	1.09631869569514	0.272939330527557	1	531.613593132628	467.289972122038	343.91513501877	471.870405880816	535.729875470998	523.758418700395
FBgn0037149	58.8587205137334	-0.491664557677142	0.448478186469147	-1.0962953662206	0.272949536587512	1	17.4490238446158	7.97812147525431	13.8675457668859	9.13297559769321	10.9085268761063	7.88453533527476
FBgn0030756	21.3149553787296	1.71984084391035	1.56904734517326	1.09610512977889	0.273032770002059	1	0	0	0	0	2.42411708357917	0
FBgn0267385	7327.85927391053	-0.104615494252328	0.0954879887442934	-1.09558799622932	0.273259117170081	1	9200.28863913776	9868.93626488958	8718.52602364116	8931.03535947755	7949.8919755979	8963.59031401665
FBgn0030858	293.649847042275	-0.208225996670687	0.190204696579979	-1.09474687226312	0.273627547581569	1	272.204771976007	260.998545404748	291.218461104604	222.235739543868	260.592586484761	230.904249104475
FBgn0031068	97.2723432218574	0.260080577516675	0.23761761810412	1.09453406524221	0.273720815437032	1	61.6532175843092	53.5673870481361	80.4317654479381	76.1081299807768	58.1788100059002	97.9935105955578
FBgn0023180	126.678762763766	-0.405933322194327	0.370929027192924	-1.09436925243167	0.273793063591224	1	17.4490238446158	13.6767796718645	19.4145640736402	11.1625257305139	13.3326439596855	13.5163462890425
FBgn0037108	565.216362697159	-0.118553360366078	0.108343248515377	-1.09423856115272	0.273850363327432	1	582.797396410168	613.17562195526	642.067369006817	572.333137455441	529.66958276205	589.0874257641
FBgn0032945	1492.24119287944	0.215218796682293	0.19680852790507	1.09354406017458	0.274154994910506	1	3343.23296862839	3139.96066633223	2150.856348444	3271.63481410699	3156.20044282009	3597.6008372668
FBgn0260986	198.249835725065	1.71768087135181	1.57079586694725	1.09350992544309	0.2741699735236	1	0	0	0	1.01477506641036	1.21205854178959	0
FBgn0038414	10.4371207094022	1.72076839844308	1.57383997857789	1.0933566448083	0.274237241273901	1	0	0	0	0	2.42411708357917	0
FBgn0000038	156.93778675552	0.347901275069803	0.318200305857291	1.09334047977261	0.274244336014344	1	411.796962732933	384.089562451529	278.737669914406	457.663554951071	473.914889839729	437.028530012373
FBgn0037515	388.50239780618	0.150037848783426	0.13726587290048	1.09304552991264	0.27437380981522	1	468.797107292011	498.062726383733	452.08199200048	550.008085994413	524.821348594891	500.104812694571
FBgn0025837	24.5343083586055	1.71826474538843	1.57204248107979	1.09301419399824	0.274387567758803	1	0	0	0	0	0	2.25272438150707
FBgn0031651	236.290593920233	-0.14269639624301	0.130553199183719	-1.09301340093707	0.27438791595616	1	159.367751114158	180.077599012883	178.891340392828	159.319685426426	156.355551890857	153.185257942481
FBgn0035722	242.063519589377	-0.183805008684841	0.168165798495868	-1.09299875675586	0.274394345609167	1	161.694287626773	176.658404094917	166.410549202631	139.024184098219	180.596722726649	126.152565364396
FBgn0016919	15.9981595221635	0.417670544846024	0.382306768236311	1.09250104771322	0.274612930210162	1	43.0409254833856	43.3098022942377	18.0278094969517	48.7092031876971	41.209990420846	50.6862985839092
FBgn0039335	201.956483559215	-0.144986792996081	0.132757885108725	-1.09211436200073	0.274782837483652	1	171.000433677235	160.702161144408	178.891340392828	130.905983566936	174.536430017701	157.690706705495
FBgn0004465	414.843529735863	-0.131246059524893	0.120257251900876	-1.09137750489322	0.275106806554052	1	283.837454539084	281.513714912545	328.660834675196	279.063143262848	265.44082065192	269.200563590095
FBgn0037696	126.579252527256	0.212255158940266	0.194515604552128	1.09119861837812	0.275185495716739	1	82.5920461978481	88.8990678671194	83.2052746013153	100.462731574625	89.6923320924295	104.751683740079
FBgn0033781	97.6093419582221	-0.259083577350854	0.237488266791068	-1.09093211572757	0.275302754230843	1	51.1838032775397	62.6852401627124	48.5364101841006	35.5171273243625	50.9064587551627	50.6862985839092
FBgn0038542	45.2736594009478	0.357586585792448	0.327787937614636	1.09090831222973	0.275313229191694	1	76.7757049163095	98.0169209816958	52.6966739141664	98.4331814418046	122.417912720748	72.0871802082264
FBgn0287218	110.421628625502	-0.205941150589179	0.188813710532198	-1.09071078582538	0.275400163102136	1	193.102530547082	168.680282619663	199.692659043157	170.48221115694	138.174673764013	176.838863948305
FBgn0030634	79.8063797305396	0.22821050590366	0.209238649058303	1.09067090105361	0.275417719176022	1	157.041214601542	162.981624423052	146.99598512899	182.659511953864	172.112312934121	192.607934618855
FBgn0053337	15.8027531206375	1.71656632049672	1.57389210029318	1.09065057266439	0.275426667413819	1	0	0	0	1.01477506641036	0	1.12636219075354
FBgn0053548	554.527378447894	-0.187488497267617	0.17191290565329	-1.09060164247203	0.275448206529815	1	998.084163912024	1083.88478899526	1112.17717050425	914.312334835732	893.287145298926	996.830538816881
FBgn0262887	47.9946654662262	-0.251410827139767	0.230531244006875	-1.09057159788835	0.275461432752955	1	46.5307302523088	66.1044350806785	73.4979925644952	54.7978535861593	52.1185172969523	48.4335742024021
FBgn0052554	15.3625137963093	0.54021743882893	0.495434753009919	1.09039068322709	0.275541084145859	1	5.8163412815386	7.97812147525431	8.32052746013153	15.2216259961554	4.84823416715835	11.2636219075354
FBgn0265416	129.10660917278	0.220218082588841	0.201992043599273	1.09023146983812	0.275611194107998	1	324.551843509854	313.426200813562	206.6264319266	329.801896583366	332.104040450347	324.392310937019
FBgn0038425	75.3595350139669	-0.292499953701052	0.268326441982684	-1.09008993500509	0.275673529498202	1	33.7347794329239	30.7727542616952	29.1218461104604	27.3989267930796	25.4532293775813	23.6536060058243
FBgn0052069	70.3590706546589	0.270909443259114	0.248531637531672	1.0900400687401	0.275695494108054	1	30.2449746640007	41.0303390155936	51.3099193374778	53.7830785197489	49.6944002133731	42.8017632486344
FBgn0261794	909.601100300653	0.216556432643585	0.198695387840307	1.08989159233849	0.275760900626608	1	1842.61691799143	1780.26082062103	1432.51747771931	1950.39767764071	1940.50572540513	1984.65018010773
FBgn0039326	216.503193740005	0.175679975065269	0.161199608703265	1.089828793497	0.275788567828182	1	197.755603572312	240.483375896951	227.427750576929	282.107468462079	238.775532732549	229.777886913722
FBgn0052220	107.246135195166	-0.215613593305426	0.197852579694305	-1.08976892612956	0.275814945277238	1	132.61258121908	174.378940816273	214.946959386731	160.334460492836	141.810849389382	145.300722607206
FBgn0259483	478.646722389697	-0.13774256019801	0.126412195593147	-1.0896303125794	0.275876024750938	1	369.919305505855	360.155198025766	363.32969909241	335.890546981828	336.952274617505	321.013224364758
FBgn0037975	696.02759258298	-0.257017201174856	0.235954535855684	-1.08926577843816	0.276036699212395	1	971.328994016946	990.426794570856	1298.00228378052	941.711261628811	921.164491760086	863.919800307963
FBgn0030412	770.703454693458	0.255514296023822	0.234577158502813	1.08925480065766	0.276041538840758	1	1606.47346196096	1551.1747611173	1218.95727290927	1667.27543411222	1839.90486643659	1718.8287030899
FBgn0085483	57.6782810987786	-0.309759214092883	0.284457987940755	-1.08894538815833	0.276177969224624	1	89.5716557356945	80.9209463918651	110.940366135087	81.1820053128286	77.5717466745336	67.5817314452123
FBgn0263240	33.5109291329837	0.391947065071132	0.3600815383819	1.088495308125	0.276376506738583	1	37.2245842018471	33.0522175403393	23.574827803706	49.7239782541075	41.209990420846	32.6645035318526
FBgn0039488	135.421945415517	-0.220490488108854	0.202612096495272	-1.08823950752614	0.276489387840678	1	50.020535021232	87.7593362277974	81.8185200246267	63.9308291838525	64.2391027148481	59.6971961099375
FBgn0039379	254.525403617748	-0.198766372466108	0.182712847726877	-1.08786204658814	0.276656013292412	1	127.959508193849	120.811553768137	108.16685698171	91.3297559769321	123.629971262538	97.9935105955578
FBgn0038449	35.5702279020979	1.71622811659411	1.57838056610622	1.08733479963451	0.27688887448265	1	0	0	0	1.01477506641036	0	1.12636219075354
FBgn0034814	170.653622886108	-0.180450727780219	0.165962502771538	-1.08729818342536	0.276905051168917	1	104.694143067695	112.833432292882	90.1390474847583	105.536606906677	87.2682150088503	78.8453533527476
FBgn0031010	13.4248792783398	1.71860812020363	1.58107337320695	1.086988212772	0.277042019002638	1	0	0	0	0	0	2.25272438150707
FBgn0250815	2614.75886328665	1.18710640037783	1.09224610789722	1.08684882628078	0.277103625251042	1	0	20.5151695077968	0	10.1477506641036	0	37.1699522948667
FBgn0035027	153.258549142682	0.203770982612534	0.187506013099279	1.08674372221142	0.277150085476153	1	93.0614605046176	94.5977260637297	90.1390474847583	106.551381973087	106.661151677484	107.004408121586
FBgn0030012	80.7986715207313	0.258478375647662	0.237892005397574	1.08653662074807	0.277241648182316	1	34.8980476892316	37.6111440976275	63.7907105276751	46.6796530548764	56.9667514641106	57.4444717284304
FBgn0039427	264.001680053474	0.124732387093981	0.114821551231478	1.08631511903653	0.277339600262256	1	190.775994034466	177.798135734239	191.372131583025	211.073213813354	193.929366686334	203.87155652639
FBgn0033873	175.333359408793	1.71609781858941	1.57995007057731	1.08617218388576	0.277402821295395	1	0	0	0	1.01477506641036	0	1.12636219075354
FBgn0035721	84.1863726768137	-0.291447866509863	0.268408269912673	-1.08583787900681	0.27755072457913	1	36.0613159455393	41.0303390155936	47.149655607412	38.5614525235936	36.3617562536876	25.9063303873314
FBgn0030360	86.5958154918623	-0.198861312440748	0.183187182377492	-1.08556346497517	0.277672171062978	1	146.571800294773	133.348601800679	123.421157325284	113.65480743796	128.478205429696	110.383494693847
FBgn0027053	385.223020409815	0.145069450696049	0.133643721900455	1.08549394339754	0.277702944735537	1	184.959652752928	210.850353274578	195.532395313091	210.058438746944	215.746420438547	228.651524722968
FBgn0036581	203.225025492626	-0.168086208179511	0.154850415770255	-1.08547469726457	0.277711464431868	1	157.041214601542	158.422697865764	191.372131583025	153.231035027964	135.750556680434	159.943431087002
FBgn0033657	110.807669215643	0.235959603077184	0.217386247648898	1.08543942236072	0.277727080055144	1	253.592479875083	254.160155568816	203.852922773223	293.269994192593	278.773464611605	266.947839208588
FBgn0030479	146.056846886765	0.145417700480634	0.133977151262274	1.08539179338098	0.277748165574543	1	211.714822648005	222.247669667799	199.692659043157	244.560791004896	233.92729856539	223.0197137692
FBgn0031359	737.288008299425	0.10039936203255	0.0925047276369279	1.08534303702409	0.277769751316908	1	1079.51294185356	1020.05981719323	962.40767622188	1080.73544572703	1081.15621927631	1122.98310418128
FBgn0002869	22.7783130226337	-0.795467992275438	0.732921538745793	-1.0853385392885	0.277771742642219	1	2.32653651261544	2.27946327864409	9.70728203682012	2.02955013282071	3.63617562536876	2.25272438150707
FBgn0053801	14.9913407816436	1.71767769624688	1.58275143110367	1.08524791858765	0.277811866079088	1	0	0	0	1.01477506641036	1.21205854178959	0
FBgn0085227	47.5912201896246	1.72347216901871	1.58831965183076	1.08509150978027	0.277881127297658	1	0	0	0	0	2.42411708357917	0
FBgn0024728	543.508114920337	0.187358226288406	0.172676286342148	1.0850258032372	0.277910227089297	1	673.53232040217	645.088107856277	582.436922209207	727.593722616226	728.447183615542	709.608180174729
FBgn0035942	148.101012125885	0.181008987747887	0.166825428726436	1.08502036607806	0.277912635164622	1	87.245119223079	100.29638426034	70.724483411118	87.2706557112907	93.3285077177982	114.888943456861
FBgn0030407	118.665684498681	-0.200301589624347	0.184644336404453	-1.08479682358411	0.278011652688532	1	174.490238446158	165.261087701696	131.741684785416	139.024184098219	122.417912720748	149.80617137022
FBgn0037553	246.733293582491	-0.211330951911333	0.194848754660228	-1.0845896976855	0.27810341996119	1	561.858567796629	560.747966546446	379.970754012673	450.560129486199	406.039611499512	442.66034096614
FBgn0028407	23.5326988075563	0.336134750259654	0.309999313629912	1.08430804676214	0.278228238677288	1	44.2041937396934	51.287923769492	54.083428490855	72.0490297151353	67.8752783402169	48.4335742024021
FBgn0053198	112.163664891984	-0.286969457689682	0.264784104950759	-1.08378657300086	0.278459439876469	1	58.163412815386	52.427655408814	85.9787837546925	47.6944281212868	66.6632197984273	46.180849820895
FBgn0002579	8996.65590932831	-0.166781683581804	0.15393082546403	-1.08348463070366	0.278593369105576	1	6909.81344246786	7000.23172871599	8052.88382683063	6725.92914016785	6428.75850565197	6409.00086538763
FBgn0030617	34.3767527529156	-0.255419509805027	0.235783280097431	-1.08328084035256	0.27868378692329	1	86.0818509667713	94.5977260637297	72.1112379878066	72.0490297151353	76.359688132744	64.2026448729516
FBgn0032198	1561.33565482629	0.129324026993694	0.119386389674632	1.08323928168149	0.278702228148462	1	1223.75820563572	1049.6928398156	994.303031485718	1237.01080595423	1166.00031720158	1172.54304057443
FBgn0085387	561.417644206472	0.342685241610709	0.316390243103078	1.08310938494732	0.278759873817081	1	2262.55675851852	1749.48806635934	845.920291780039	1965.61930363686	2102.92157000493	2093.90731261083
FBgn0032973	52.6563075810646	-0.22980980891612	0.2122170499987	-1.08289983730114	0.278852884122261	1	84.9185827104636	99.1566526210178	95.6860657915126	73.0638047815457	82.4199808416919	83.3508021157618
FBgn0033187	174.873383111983	0.145388485031071	0.134292636734076	1.08262439823091	0.278975173255999	1	188.449457521851	172.099477537629	140.062212245547	177.585636621812	190.293191060965	189.228848046594
FBgn0000351	158.284375782499	-0.449039082196786	0.414985778042524	-1.08205896673108	0.279226327193259	1	10.4694143067695	12.5370480325425	15.2543003435745	11.1625257305139	7.27235125073752	9.0108975260283
FBgn0031764	93.5113115863812	-0.281547983560259	0.260197559117636	-1.08205466844126	0.279228237000653	1	43.0409254833856	51.287923769492	48.5364101841006	33.4875771915418	55.754692922321	29.285416959592
FBgn0264953	833.759856120492	0.171037186302137	0.158114022685242	1.08173319100622	0.279371100377261	1	1658.82053349481	1472.53327800408	1310.48307497072	1592.18207919785	1672.64078766963	1737.97686033271
FBgn0053200	20.1208932997326	-0.342778458869548	0.316922407475648	-1.08158480051899	0.279437061319485	1	60.4899493280015	41.0303390155936	52.6966739141664	34.5023522579521	37.5738147954772	49.5599363931557
FBgn0029853	122.102320559823	-0.178686621888355	0.165235010007746	-1.08140896944285	0.279515233562116	1	115.163557374464	92.3182627850856	126.194666478662	102.492281707446	98.1767418849566	92.3616996417901
FBgn0038881	620.471124841599	0.251362930302831	0.232442907653597	1.08139642908542	0.279520809412196	1	1683.24916687727	1532.93905488815	1008.1705772526	1573.91612800246	1751.42459288595	1705.31235680086
FBgn0052107	90.5572069900123	1.71560657016167	1.58685451151539	1.08113664971297	0.279636332763633	1	0	0	0	1.01477506641036	0	1.12636219075354
FBgn0033697	79.8298816771189	-0.176589103109452	0.163340049707496	-1.08111331804834	0.279646709894886	1	181.469847984004	168.680282619663	170.570812932696	142.06850929745	174.536430017701	145.300722607206
FBgn0033734	438.565688263565	-0.172382079514312	0.159488032967527	-1.08084648300484	0.279765407666484	1	348.980476892316	329.382443764071	336.981362135327	298.343869524645	284.833757320553	317.634137792498
FBgn0000370	2237.28851438015	-0.146981007828982	0.136057591586016	-1.08028523888768	0.280015180869196	1	3325.78394478377	3122.8646917424	3623.58970888728	2913.41921566414	3152.56426719472	3029.91429312702
FBgn0003339	92.1070781977893	0.173939532794442	0.161013065940846	1.08028209871083	0.280016578783533	1	264.061894181852	232.505254421697	178.891340392828	259.782417001051	258.168469401182	246.673319775025
FBgn0020506	60.3408514364885	1.71279017517368	1.58560404111156	1.08021304863285	0.280047319045078	1	0	0	0	2.02955013282071	0	0
FBgn0029962	41.0596770387177	0.282769109188998	0.261952624476454	1.0794666010854	0.280379774864519	1	94.2247287609253	105.99504245695	87.3655383313811	120.758232902832	126.054088346117	103.625321549325
FBgn0035691	80.3492464738481	-0.302830074206203	0.280567426306197	-1.07934865494938	0.280432330707472	1	25.5919016387698	27.3535593437291	40.2158827239691	22.3250514610279	23.0291122940022	29.285416959592
FBgn0034703	122.581367112865	-0.264499673605083	0.245099273224732	-1.07915323503453	0.280519422965966	1	34.8980476892316	37.6111440976275	42.9893918773463	32.4728021251314	35.149697711898	28.1590547688384
FBgn0035865	9.65818876020281	-1.14776095897365	1.06427141864816	-1.07844760167621	0.280834053568256	1	1.16326825630772	1.13973163932204	5.54701830675435	1.01477506641036	0	2.25272438150707
FBgn0035656	80.4135048906919	0.286847972935863	0.266100411403375	1.07796891941305	0.281047626668929	1	69.7960953784632	84.3401413098313	105.393347828333	110.610482238729	88.4802735506399	116.015305647614
FBgn0000330	191.84442456889	-0.155273560147595	0.144075865642041	-1.07772082059444	0.281158363998288	1	159.367751114158	166.400819341018	177.504585816139	155.260585160785	151.507317723698	144.174360416453
FBgn0067783	192.165949837047	-0.134316124052177	0.124652655947207	-1.07752316251539	0.281246608618548	1	290.81706407693	291.771299666443	271.803897030963	279.063143262848	236.35141564897	262.442390445574
FBgn0283531	313.728657400158	-0.306952970062515	0.284962919533832	-1.07716811213423	0.281405168375104	1	80.2655096852327	96.8771893423737	91.5258020614469	70.0194795823146	75.1476295909544	72.0871802082264
FBgn0030607	405.057697399942	-0.200903033196633	0.186551852301071	-1.07692864326215	0.2815121455488	1	604.899493280015	640.529181298989	370.263471975853	479.988606412099	443.613426294989	484.335742024021
FBgn0037061	138.808969543918	-0.200284351312484	0.186011781322811	-1.07672938718276	0.281601179619396	1	88.4083874793867	93.4579944244076	108.16685698171	82.1967803792389	88.4802735506399	81.0980777342547
FBgn0011205	1067.86669926543	-0.106722118096455	0.0991870332256819	-1.07596844694032	0.281941368156659	1	1470.37107597296	1479.37166784001	1268.88043767006	1248.17333168474	1259.32882491938	1413.58454939569
FBgn0003963	153.223472303072	0.24269904130416	0.225618051038425	1.07570755171015	0.28205806901066	1	208.225017879082	184.636525570171	181.664849546205	207.014113547713	246.047883983286	227.525162532215
FBgn0261016	826.508337228965	-0.513165728386481	0.477184074655006	-1.07540413782143	0.282193830053603	1	19.7755603572312	6.83838983593226	9.70728203682012	7.1034254648725	7.27235125073752	11.2636219075354
FBgn0004687	1089.09579976038	-0.165842190715569	0.154236341016806	-1.07524717989451	0.282264077488892	1	914.328849457868	827.445170147804	1044.22619624651	857.484931116752	879.95450133924	744.525408088088
FBgn0036514	195.89720646843	0.248058892846445	0.230860723136567	1.07449586692884	0.28260049620128	1	81.4287779415404	50.1481921301699	61.0172013742979	57.8421787853904	96.964683343167	75.466266780487
FBgn0051041	62.485833014753	1.08774912871089	1.01264293385831	1.07416848756987	0.282747173283692	1	2.32653651261544	1.13973163932204	0	4.05910026564143	2.42411708357917	1.12636219075354
FBgn0024963	538.140636342012	0.221725073262374	0.206425447333835	1.07411695663566	0.282770265593312	1	1639.04497313758	1383.63421013696	873.655383313811	1521.14782454913	1576.88816286825	1448.50177730905
FBgn0029771	165.526210802571	-0.175820372229454	0.163689771151433	-1.07410726395847	0.28277460926893	1	280.347649770161	216.549011471188	264.87012414752	255.72331673541	209.686127729599	207.250643098651
FBgn0022213	1291.9716544072	-0.143083716959534	0.133212812190954	-1.07409876427224	0.282778418354884	1	396.674475400933	304.308347698986	396.611808932936	330.816671649776	321.195513574241	340.161381607568
FBgn0037312	301.751858197796	-0.160354083389833	0.14934748056892	-1.07369794775905	0.282958081477863	1	247.776138593544	237.064180978985	252.389332957323	233.398265274382	218.170537522126	207.250643098651
FBgn0038956	12.0112601691851	0.452026486430229	0.421138386753756	1.07334429880536	0.283116666301007	1	16.2857555883081	13.6767796718645	11.0940366135087	21.3102763946175	18.1808781268438	16.8954328613031
FBgn0033471	213.705124025066	-0.234160746856428	0.218207983634691	-1.07310806394895	0.283222633318923	1	68.6328271221555	93.4579944244076	62.4039559509865	49.7239782541075	93.3285077177982	50.6862985839092
FBgn0040347	269.810303006395	-0.273724358758022	0.255134918093388	-1.07286121712995	0.283333389210719	1	51.1838032775397	29.6330226223731	38.8291281472805	31.4580270587211	30.3014635447397	37.1699522948667
FBgn0038083	32.0815602284584	-0.282808515939076	0.263644387126766	-1.07268931085984	0.283410537904755	1	47.6939985086165	41.0303390155936	48.5364101841006	35.5171273243625	43.6341075044251	33.7908657226061
FBgn0030245	1682.21932174284	-0.115753531230521	0.107920954339913	-1.0725769794987	0.283460958049889	1	1896.12725778158	2002.50849028883	2075.97160130282	1805.28484314403	1830.20839810228	1877.64577198615
FBgn0031190	1388.46356160316	-0.0969371880701323	0.0903973925645649	-1.07234495730501	0.283565120886667	1	1527.37122053204	1546.61583456001	1501.85520655374	1441.99536936912	1316.29557638349	1519.46259532652
FBgn0051612	45.7572182913109	0.268056321573731	0.250055233569923	1.07198844729948	0.283725221145201	1	50.020535021232	52.427655408814	30.5086006871489	41.6057777228246	52.1185172969523	68.7080936359658
FBgn0031693	375.388730549177	0.204017000475385	0.190327824464001	1.07192419736806	0.283754080786528	1	504.858423237551	516.298432612886	535.287266601795	575.377462654672	619.361914854479	598.098323290128
FBgn0029922	134.312956403805	0.35754120757177	0.333640583028332	1.07163584335725	0.283883627478427	1	424.592913552318	336.220833600003	241.295296343814	418.087327361067	456.946070254674	409.995837434288
FBgn0002673	409.681517294696	-0.254636685360257	0.237618579359851	-1.07161942490462	0.283891004880961	1	47.6939985086165	39.8906073762715	55.4701830675435	39.5762275900039	44.8461660462147	34.9172279133597
FBgn0023495	22.1443234306333	0.764874340969326	0.713848308553035	1.07148021758253	0.283953560964159	1	3.48980476892316	2.27946327864409	2.77350915337718	3.04432519923107	8.48440979252711	3.37908657226061
FBgn0265974	403.311455401135	0.297019093545249	0.277508905688737	1.07030472700719	0.284482167392184	1	882.92060653756	733.987175723396	550.54156694537	802.687077530592	921.164491760086	940.512429279204
FBgn0030103	24.3882047621154	-0.290106672104995	0.271056731143434	-1.07028027262485	0.284493171350629	1	50.020535021232	42.1700706549156	55.4701830675435	36.5319023907729	39.9979318790564	43.928125439388
FBgn0042104	22.7529094383613	0.867926858288017	0.811186269488974	1.06994766915223	0.284642864525781	1	3.48980476892316	0	2.77350915337718	1.01477506641036	4.84823416715835	5.63181095376769
FBgn0027085	303.797076458731	0.121578372056376	0.113666341580692	1.06960750531473	0.284796015467385	1	202.408676597543	209.710621635256	181.664849546205	217.161864211816	214.534361896757	216.261540624679
FBgn0029928	33.8714328832063	-0.397074553634083	0.371300136739899	-1.06941666415878	0.284881961711782	1	19.7755603572312	15.9562429505086	15.2543003435745	13.1920758633346	10.9085268761063	14.642708479796
FBgn0031484	175.641210136224	0.275486167090367	0.25760591917603	1.06940930538991	0.284885276120451	1	51.1838032775397	83.2004096705092	55.4701830675435	71.034254648725	101.812917510325	58.5708339191839
FBgn0267978	620.522544988939	0.249184925393194	0.233032878561713	1.06931230876592	0.284928966090315	1	1426.16688223326	1359.6998457112	1127.43147084782	1486.64547229117	1551.43493349067	1614.07701934982
FBgn0002905	177.305354246949	-0.217777133758499	0.203662211048903	-1.069305555689	0.284932008032207	1	108.183947836618	96.8771893423737	126.194666478662	96.4036313089839	78.7838052163232	108.13077031234
FBgn0083986	77.6413404448291	-0.286937437562888	0.268395963669491	-1.06908253626433	0.285032480081017	1	48.8572667649242	63.8249718020345	84.5920291780039	59.8717289182111	50.9064587551627	49.5599363931557
FBgn0036505	421.484945316531	0.110855459556329	0.103692239471575	1.06908154478347	0.285032926804627	1	374.572378531086	370.412782779664	397.998563509625	428.235078025171	410.88784566667	393.100404572985
FBgn0263390	414.240602489213	-0.128659490563409	0.120362106610125	-1.06893684554858	0.285098127860546	1	679.348661683709	694.096568347125	619.879295779799	590.599088650828	602.393095269425	631.889189012735
FBgn0015805	817.027027464126	0.10769973967527	0.10078910712896	1.06856527201365	0.285265604021842	1	336.184526072931	362.43466130441	306.472761448178	385.614525235936	333.316098992137	364.941349804146
FBgn0030871	145.291936967455	0.376300905582773	0.352183729716905	1.06847896092546	0.285304515799203	1	5.8163412815386	19.3754378684747	26.3483369570832	23.3398265274382	18.1808781268438	23.6536060058243
FBgn0027348	1448.41554403892	0.171132699590356	0.16018995022759	1.06831108535348	0.285380209712139	1	2055.49500889574	1860.04203537358	1468.57309671322	2084.34798640687	1918.68867165292	2061.24280907897
FBgn0013303	464.731566933529	-0.163988266361337	0.153512664373988	-1.0682393340645	0.285412566004303	1	583.960664666476	616.594816873226	617.105786626422	540.87511039672	578.151924433633	503.483899266831
FBgn0039755	184.303718911725	1.08772234497418	1.01833422644962	1.06813884550112	0.28545788555878	1	2.32653651261544	1.13973163932204	0	4.05910026564143	2.42411708357917	1.12636219075354
FBgn0030300	174.936736839276	-0.195574123707076	0.183123850012633	-1.06798826965239	0.285525803192452	1	328.041648278777	288.352104748477	249.615823803946	260.797192067462	229.079064398232	266.947839208588
FBgn0037956	309.643741825316	0.149990017295068	0.140441699048997	1.06798777222668	0.285526027575733	1	678.185393427401	593.800184086785	522.806475411598	628.145766108011	662.996022358904	702.850007030207
FBgn0031703	370.816085016066	-0.183722613998259	0.172042522707701	-1.06789072321616	0.285569807599851	1	642.124077481862	718.030932772888	454.855501153857	476.944281212868	541.790168179946	582.329252619579
FBgn0040339	169.104564215043	0.199363605260801	0.186695571905664	1.06785395725153	0.28558639437206	1	89.5716557356945	72.9428249166108	69.3377288344294	90.3149809105218	99.3888004267462	77.7189911619941
FBgn0033427	120.261151050623	-0.223519078980527	0.209417028105468	-1.06733956165186	0.285818529545721	1	54.6736080464629	56.9865819661022	59.6304467976093	53.7830785197489	41.209990420846	50.6862985839092
FBgn0029718	257.374061489803	-0.153567080759741	0.14391775018746	-1.067047536247	0.285950370778123	1	173.32697018985	172.099477537629	201.079413619845	165.408335824888	155.143493349067	168.954328613031
FBgn0038300	165.668443515821	0.171256948071163	0.160519806054828	1.06688982674616	0.286021589255773	1	97.7145335298485	90.0387995064415	94.299311214824	98.4331814418046	117.56967855359	102.498959358572
FBgn0034753	4091.03966542933	-0.138173217339567	0.129551494927236	-1.06655054360564	0.286174843405537	1	2388.18973019975	2321.633349299	2587.68404010091	2279.18479915766	2136.85920917504	2213.3017048307
FBgn0040087	419.409583325731	-0.115026437297961	0.107888669303204	-1.0661586433576	0.286351933732961	1	408.30715796401	393.207415566105	425.733655043397	387.644075368756	375.738147954772	368.320436376407
FBgn0031682	158.214253422984	0.230155442640218	0.215956271608589	1.06575021380886	0.286536572011975	1	86.0818509667713	77.501751473899	85.9787837546925	87.2706557112907	106.661151677484	99.1198727863113
FBgn0052695	365.089909103629	-0.241984427882794	0.227068222877849	-1.06569041152434	0.286563613509133	1	471.123643804627	474.12836195797	679.509742577408	462.737430283123	473.914889839729	435.902167821619
FBgn0036353	180.879259742441	-0.147536641489523	0.138493028501572	-1.06530013160806	0.286740133260711	1	182.633116240312	151.584308029832	148.382739705679	147.142384629502	139.386732305803	149.80617137022
FBgn0039271	93.1092577979594	-0.285727179449351	0.268251282260678	-1.06514748798737	0.28680919243206	1	26.7551698950776	36.4714124583054	34.6688644172147	25.3693766602589	30.3014635447397	24.7799681965778
FBgn0052687	1247.77324006213	-0.136962878607588	0.128654853067018	-1.06457607577572	0.287067810983809	1	1890.31091650005	1935.26432356883	1884.59946971979	1639.87650731914	1688.3975487129	1865.25578788786
FBgn0015572	20.9475778423012	-0.382931549529725	0.359973159786784	-1.06377805988796	0.287429252678616	1	24.4286333824621	17.0959745898307	24.9615823803946	24.3546015938486	9.6964683343167	15.7690706705495
FBgn0028685	1036.18166276326	-0.117352482824117	0.110342818589644	-1.06352623871737	0.287543372606615	1	596.75661548586	574.42474621831	607.398504589602	564.214936924159	515.124880260575	558.675646613755
FBgn0052183	267.09220556041	0.191978024441986	0.180521648238738	1.063462616894	0.287572209482902	1	706.103831578786	691.817105068481	474.270065227497	663.662893432373	755.112471534913	723.124526463771
FBgn0053527	14.9795177869481	-0.387977472274935	0.364907864559492	-1.06322036315466	0.287682029934278	1	23.2653651261544	31.9124859010172	31.8953552638375	28.41370185949	23.0291122940022	14.642708479796
FBgn0040942	86.3138631991253	-0.215821362358762	0.202999640941474	-1.06316130096498	0.287708808779697	1	147.73506855108	180.077599012883	167.797303779319	153.231035027964	111.509385844642	161.069793277756
FBgn0038846	14.1461829769915	1.09194661169203	1.02725579464579	1.06297439973901	0.287793561029673	1	2.32653651261544	1.13973163932204	0	2.02955013282071	2.42411708357917	3.37908657226061
FBgn0000565	858.311819098744	0.143212605822454	0.134766883841725	1.06266911974197	0.287932029545872	1	880.594070024944	1079.32586243798	886.136174504008	1025.93759214087	1036.3100532301	1082.43406531415
FBgn0052803	157.978497477191	0.184987189056997	0.174079925757678	1.06265664034406	0.287937690891268	1	76.7757049163095	88.8990678671194	88.7522929080697	98.4331814418046	90.9043906342191	99.1198727863113
FBgn0013433	73.9963363932425	0.327462100449894	0.308387984413152	1.06185103506234	0.288303316886727	1	222.184236954775	197.173573602714	127.58142105535	227.30961487592	215.746420438547	244.420595393518
FBgn0032197	664.674690390463	-0.172930811954097	0.162858144546056	-1.06184933173663	0.288304090276892	1	339.674330841854	352.177076550512	327.274080098507	328.787121516956	294.53022565487	280.464185497631
FBgn0003082	242.505240579182	-0.163231040346517	0.153782505269269	-1.0614408970689	0.288489579251303	1	132.61258121908	150.44457639051	160.863530895876	132.935533699757	123.629971262538	138.542549462685
FBgn0020305	189.00931058909	-0.1762923843451	0.166120883956906	-1.06122951037771	0.288585611259648	1	104.694143067695	91.1785311457635	104.006593251644	101.477506641036	77.5717466745336	84.4771643065153
FBgn0034861	29.7419049240818	-0.339890231537563	0.320295477067384	-1.06117711885784	0.28860941581952	1	34.8980476892316	29.6330226223731	27.7350915337718	28.41370185949	21.8170537522126	22.5272438150708
FBgn0024321	327.352540576496	0.179122759299005	0.168809178241949	1.06109609183852	0.288646233783239	1	699.12422204094	659.904619167463	477.043574380874	656.559467967501	726.023066531963	699.470920457947
FBgn0052666	964.148531555093	0.258935087740352	0.244042392208042	1.06102503502594	0.288678523978184	1	2006.63774213082	1791.65813701425	1144.07252576809	1867.18612219506	1986.56394999313	2062.36917126973
FBgn0262018	283.685544277232	0.323051043976415	0.304587453280194	1.06061835606615	0.288863377066231	1	1005.06377344987	837.702754901702	482.590592687629	972.154513621122	970.85889197346	967.545121857289
FBgn0035335	190.946911840164	-0.206296354131535	0.194566645473273	-1.06028632826418	0.289014357125342	1	100.041070042464	115.112895571526	134.515193938793	114.66958250437	86.0561564670607	100.246234977065
FBgn0034605	713.303980353607	-0.201434389532987	0.189995261518318	-1.06020743845533	0.289050237804825	1	1093.47216092926	1181.90170997696	1335.44465735111	1051.30696880113	1099.33709740316	988.946003481606
FBgn0014930	313.181681973167	-0.125177194320574	0.118087926968964	-1.06003380306162	0.289129221263327	1	375.735646787394	339.640028517969	346.688644172147	316.609820720031	315.135220865293	342.414105989075
FBgn0263697	254.715714817644	-0.174090847421916	0.164240920403609	-1.05997242949018	0.289157142418573	1	140.755459013234	132.208870161357	140.062212245547	112.64003237155	139.386732305803	114.888943456861
FBgn0035699	49.926813903352	0.305925806953495	0.288850002605415	1.05911651097129	0.289546721388739	1	146.571800294773	90.0387995064415	95.6860657915126	140.038959164629	140.598790847592	130.65801412741
FBgn0035481	131.808605833528	0.4257802355615	0.402043939388221	1.05903905978386	0.289581991421318	1	379.225451556317	363.574392943732	214.946959386731	428.235078025171	459.370187338254	399.858577717506
FBgn0086558	4711.42304095696	-0.163222521103568	0.15420378964066	-1.05848579651592	0.28983402281799	1	4201.72494178349	4538.41138778038	4548.55501153857	4136.22317068862	3855.55822143268	3874.68593619217
FBgn0034670	9.03844926822266	-1.13540407738729	1.07301993873658	-1.05813884383562	0.289992147613629	1	2.32653651261544	1.13973163932204	4.16026373006577	0	2.42411708357917	1.12636219075354
FBgn0004512	430.609613913754	-0.12581248359911	0.118948937970503	-1.05770161336211	0.290191499492482	1	621.185248868323	602.918037201361	647.614387313571	595.67296398288	573.303690266475	545.159300324712
FBgn0003044	339.704076358159	0.316581756032516	0.299439410698256	1.05724812673885	0.290398360658032	1	152.388141576311	165.261087701696	128.968175632039	166.423110891299	223.018771689284	167.827966422277
FBgn0015296	231.000645124434	0.1828882008867	0.172993016887946	1.05719990423177	0.290420363534689	1	132.61258121908	131.069138522035	153.929758012433	162.364010625657	172.112312934121	138.542549462685
FBgn0033683	255.041272005579	-0.203484272713589	0.192475618193811	-1.05719505994101	0.290422573940751	1	214.041359160621	267.83693524068	296.765479411358	242.531240872075	219.382596063915	212.882454052419
FBgn0058198	19.7882251454282	0.425831987214799	0.4029102925102	1.05689031809486	0.290561647644686	1	51.1838032775397	18.2357062291527	23.574827803706	61.9012790510318	26.6652879193709	36.0435901041132
FBgn0002031	1139.63402086571	0.121986627676573	0.115431872685529	1.05678461969427	0.290609895225637	1	622.34851712463	557.328771628479	624.039559509865	673.810644096477	615.72573922911	671.311865689108
FBgn0025693	302.506489065484	0.131640495994301	0.124594167314443	1.05655424191788	0.290715073206618	1	412.960230989241	416.002048352546	402.158827239691	422.146427626709	478.763124006887	449.418514110661
FBgn0002733	39.161345730256	-0.30194239291739	0.28589251598495	-1.05613954907894	0.290904463961218	1	37.2245842018471	47.8687288515258	38.8291281472805	27.3989267930796	46.0582245880043	28.1590547688384
FBgn0031403	65.3668091965521	-0.321318551987212	0.30434041644982	-1.05578666065929	0.291065693897838	1	30.2449746640007	26.213827704407	26.3483369570832	29.4284769259004	16.9688195850542	19.1481572428101
FBgn0034521	145.6262016122	0.197219670622576	0.186980324508535	1.0547616234005	0.291534360260881	1	161.694287626773	131.069138522035	130.354930208727	164.393560758478	163.627903141594	157.690706705495
FBgn0010786	1207.00667906649	-0.100947965969492	0.0957088120503146	-1.05474055948394	0.291543996396664	1	942.247287609253	973.330819981026	1076.12155151034	935.622611230349	973.283009057039	878.562508787759
FBgn0037712	27.1947605492836	0.310669404275315	0.294621707859425	1.05446881878625	0.291668329143872	1	46.5307302523088	55.8468503267801	42.9893918773463	56.82740371898	46.0582245880043	77.7189911619941
FBgn0264785	635.002781116172	0.118645747333207	0.112527197792381	1.05437396168094	0.29171173863114	1	564.185104309244	526.556017366784	454.855501153857	557.111511459286	556.334870681421	567.686544139783
FBgn0037141	293.167411167181	-0.217926815740137	0.206695984091883	-1.0543350258961	0.291729558083584	1	57.0001445590783	58.1263136054242	70.724483411118	55.8126286525696	53.3305758387418	49.5599363931557
FBgn0032074	349.675101078763	-0.311595505181928	0.295537902719537	-1.05433347910582	0.291730266006751	1	40.7143889707702	35.3316808189834	19.4145640736402	22.3250514610279	29.0894050029501	27.0326925780849
FBgn0029783	146.860881801941	-0.216681154048779	0.205519102697477	-1.05431150294448	0.291740324013212	1	122.143166912311	135.628065079323	191.372131583025	136.994633965398	119.993795637169	127.27892755515
FBgn0050392	299.64531847311	-0.201464262832132	0.191109867823927	-1.05418032635418	0.29180036550519	1	172.163701933543	185.776257209493	253.776087534012	188.748162352326	170.900254392332	170.080690803784
FBgn0033139	187.048841322189	-0.354905343383906	0.336720647397701	-1.05400528933032	0.291880495507146	1	44.2041937396934	45.5892655728818	88.7522929080697	50.7387533205179	43.6341075044251	43.928125439388
FBgn0086691	999.027033808675	-0.157868429710514	0.149840575089978	-1.05357597310152	0.292077094302134	1	1089.98235616033	1410.98776948069	1321.57711158422	1207.58232902832	1014.49299947788	1202.95481972478
FBgn0037611	67.1273692810412	-0.282350045668885	0.268167781972162	-1.05288578513207	0.292393341755416	1	36.0613159455393	26.213827704407	44.3761464540348	29.4284769259004	29.0894050029501	28.1590547688384
FBgn0036580	206.366569817101	0.196312255925801	0.186491425448352	1.05266102960948	0.292496375439958	1	87.245119223079	85.4798729491533	74.8847471411838	92.3445310433425	89.6923320924295	102.498959358572
FBgn0033699	9072.9343205372	-0.163407707744113	0.15524406703849	-1.05258584666941	0.292530846665731	1	6514.30223532323	6937.54648855328	7018.36491262095	6158.66987804446	6077.26152853299	6041.80679120198
FBgn0083983	78.2178350681774	-0.277431396733185	0.263702494486028	-1.05206208714072	0.292771065050754	1	30.2449746640007	39.8906073762715	59.6304467976093	37.5466774571832	39.9979318790564	28.1590547688384
FBgn0259112	64.2260149733446	0.269130570093805	0.255981574922177	1.0513669594213	0.293090084645963	1	32.5715111766162	31.9124859010172	52.6966739141664	43.6353278556454	53.3305758387418	42.8017632486344
FBgn0032136	8944.28044333888	0.266661076375993	0.253677879821516	1.051179852826	0.293175994560605	1	24037.7752483427	19919.0898604314	14764.7759780034	21493.9506816378	24326.014933717	24825.022684208
FBgn0267164	14.501833836942	-0.592140451905441	0.563314460817669	-1.05117211272356	0.293179548789376	1	9.30614605046176	10.2575847538984	19.4145640736402	9.13297559769321	7.27235125073752	9.0108975260283
FBgn0029580	37.6537463915257	-0.353383324961391	0.336287103297467	-1.0508381721936	0.293332920685583	1	63.9797540969246	55.8468503267801	61.0172013742979	69.0047045159043	43.6341075044251	28.1590547688384
FBgn0035529	476.769809309101	-0.1607081112868	0.152952614895032	-1.05070522264095	0.29339399661412	1	407.143889707702	400.045805402037	422.96014589002	329.801896583366	395.131084623406	376.204971711682
FBgn0033033	198.920061148199	0.176278727709667	0.1677936584254	1.05056847418366	0.293456826629665	1	492.062472418166	462.73104556475	411.866109276511	488.106806943382	509.064587551627	548.538386896973
FBgn0265045	1103.20100348471	0.162358503584443	0.154608811061438	1.05012452052248	0.29366086640587	1	2433.55719219575	2182.58608930171	1751.47103035769	2222.35739543868	2443.51002024781	2463.35411117799
FBgn0037382	264.332096014022	0.130588553695023	0.124374855287817	1.0499594423071	0.293736760127367	1	188.449457521851	204.011963438646	178.891340392828	198.89591301643	219.382596063915	209.503367480158
FBgn0010240	125.690741918995	0.212140317322187	0.202150369131058	1.04941840192561	0.293985592421091	1	308.266087921546	246.182034093561	221.880732270174	348.067847778752	282.409640236974	269.200563590095
FBgn0040735	914.661772861621	-0.259631016451473	0.247515865490793	-1.04894696724453	0.2942025272658	1	1272.61547240065	1277.63916768001	1524.04327978076	1240.05513115346	1095.70092177779	1066.6649946436
FBgn0069923	351.775544536372	-0.250032831678275	0.238482604990148	-1.04843215583209	0.29443954486447	1	274.531308488622	306.58781097763	341.141625865393	289.210893926952	254.532293775813	230.904249104475
FBgn0031969	978.956011265218	0.0967958362469493	0.0923313925779652	1.04835239179583	0.294476279431658	1	606.062761536322	547.071186874581	593.530958822716	598.717289182111	633.906617355954	635.268275584995
FBgn0003366	942.887449567981	-0.256726021518875	0.244921617911316	-1.04819665862175	0.294548009715526	1	1927.53550070189	1801.91572176815	2543.30789364687	1722.07328769838	1889.59926664997	1637.73062535564
FBgn0039941	232.563430391714	0.130968705977376	0.124953972697017	1.04813559065419	0.294576140654481	1	352.470281661239	340.779760157291	303.699252294801	362.274698708497	373.314030871193	358.183176659625
FBgn0033686	133.646161233951	0.187854706359419	0.179295653718473	1.04773708934621	0.294759754363296	1	74.4491684036941	68.3838983593226	90.1390474847583	89.3002058441114	95.7526248013774	78.8453533527476
FBgn0035382	21.670267420691	0.269508179395195	0.25734800144527	1.04725188414766	0.294983421329983	1	38.3878524581548	38.7508757369495	40.2158827239691	43.6353278556454	44.8461660462147	52.9390229654163
FBgn0031463	20.5701787933922	-0.290952473995386	0.277826471677631	-1.04724532633084	0.294986445091445	1	40.7143889707702	55.8468503267801	42.9893918773463	41.6057777228246	39.9979318790564	32.6645035318526
FBgn0031597	88.0457872283987	-0.270415924127858	0.258232870751073	-1.04717855376564	0.295017234615967	1	39.5511207144625	36.4714124583054	34.6688644172147	35.5171273243625	23.0291122940022	32.6645035318526
FBgn0010197	13.628401840408	0.376550979400794	0.359707621964624	1.04682513354645	0.295180236211471	1	39.5511207144625	20.5151695077968	22.1880732270174	33.4875771915418	43.6341075044251	30.4117791503455
FBgn0003141	297.887280589371	0.125574359234096	0.119964416394212	1.04676339041612	0.295208719064369	1	328.041648278777	316.845395731528	288.444951951226	327.772346450545	327.255806283189	364.941349804146
FBgn0005777	649.478699773936	0.127836641840106	0.122169475022303	1.04638774797688	0.295382047136327	1	310.592624434161	347.618149993223	255.1628421107	324.728021251314	319.983455032451	357.056814468871
FBgn0051363	700.293227758494	0.106918303485846	0.102210201396381	1.04606293721315	0.29553197550852	1	590.940274204322	596.079647365429	525.579984564975	579.436562920314	625.422207563427	643.15281092027
FBgn0000276	472.822864891813	1.1302340185392	1.08060044558541	1.04593147555746	0.295592670961583	1	22.1020968698467	79.7812147525431	381.357508589362	75.0933549143664	539.366051096366	442.66034096614
FBgn0017577	812.878670659465	0.429019426333751	0.410222368063742	1.04582163171339	0.295643391936049	1	11.6326825630772	6.83838983593226	9.70728203682012	14.206850929745	15.7567610432646	7.88453533527476
FBgn0051111	59.7409492910473	-0.354708786957572	0.339193296396202	-1.04574232665037	0.295680015089428	1	22.1020968698467	26.213827704407	34.6688644172147	23.3398265274382	19.3929366686334	21.4008816243172
FBgn0039169	93.6150974093569	0.294192497860055	0.281362384081708	1.04559996113276	0.295745767241052	1	76.7757049163095	87.7593362277974	76.2715017178724	92.3445310433425	105.449093135694	97.9935105955578
FBgn0036018	271.873297874801	-0.164944281216133	0.157757867228672	-1.04555344284063	0.295767254044253	1	164.020824139389	132.208870161357	113.713875288464	112.64003237155	121.205854178959	134.037100699671
FBgn0260755	116.76781780083	-0.227186121471304	0.217337664753587	-1.04531408179472	0.295877831456196	1	77.9389731726173	84.3401413098313	109.553611558399	80.1672302464182	76.359688132744	74.3399045897335
FBgn0264606	536.030515043792	0.274043493307906	0.262193714473839	1.04519474792844	0.29593297035394	1	1665.80014303266	1459.99622997154	938.832848418175	1433.87716883783	1758.69694413669	1724.46051404367
FBgn0038755	551.803446423708	0.20760247924981	0.198663199135109	1.04499716179755	0.296024281281152	1	1240.04396122403	1071.34774096272	769.648790062167	1105.09004732088	1226.60324429106	1228.86115011211
FBgn0026148	125.240734984364	-0.254560540113931	0.243655941230097	-1.04475408573574	0.296136640440332	1	47.6939985086165	67.2441667200006	58.2436922209207	55.8126286525696	47.2702831297939	41.6754010578809
FBgn0028888	205.801888317433	0.323241337008472	0.309453197656199	1.04455646106327	0.296228011241519	1	658.40983307017	506.040847858987	413.252863853199	599.732064248521	700.569837154382	674.690952261369
FBgn0041721	1719.25366459571	-0.240615961570673	0.230352514344725	-1.04455539482668	0.296228504261955	1	1044.61489416433	1179.62224669832	1346.53869396462	1079.72067066062	951.465955304826	990.072365672359
FBgn0031432	720.361313961026	-0.199125159680926	0.190653542571406	-1.04443461681991	0.29628435473216	1	1123.71713559326	1048.55310817628	1193.99569052887	882.854307777011	911.46802342577	1137.62581266107
FBgn0063649	176.360266325239	-0.145106778456446	0.139055153598497	-1.04351960140523	0.296707707356944	1	278.021113257545	254.160155568816	280.124424491095	273.989267930796	224.230830231074	234.283335676736
FBgn0001320	18.5500305459692	0.341251302096089	0.327034271682776	1.04347260102178	0.296729464069885	1	36.0613159455393	42.1700706549156	22.1880732270174	37.5466774571832	47.2702831297939	43.928125439388
FBgn0023181	220.154690225014	-0.231043489335369	0.221536945778403	-1.04291177493471	0.296989155606804	1	48.8572667649242	52.427655408814	55.4701830675435	49.7239782541075	44.8461660462147	38.2963144856203
FBgn0031457	140.454595025122	-0.156471555815411	0.150036845097088	-1.0428875368191	0.297000382535277	1	132.61258121908	133.348601800679	133.128439362105	124.817333168474	130.902322513275	102.498959358572
FBgn0052683	107.735178791038	0.345133853661859	0.330987699542193	1.04273921399264	0.297069090830502	1	340.837599098162	278.094519994579	201.079413619845	349.082622845163	345.436684410032	348.045916942843
FBgn0039189	116.192258348647	0.237914234447561	0.228217349336172	1.0424896930036	0.297184701613954	1	36.0613159455393	34.1919491796613	42.9893918773463	37.5466774571832	52.1185172969523	43.928125439388
FBgn0035168	13.8132085439354	0.351893394696222	0.337652098060891	1.04217742675706	0.297329426586588	1	25.5919016387698	26.213827704407	27.7350915337718	29.4284769259004	31.5135220865293	40.5490388671274
FBgn0262901	10.5744350290992	0.469886535370678	0.450878187666849	1.04215849917733	0.297338200401603	1	13.9592190756926	6.83838983593226	6.93377288344294	16.2364010625657	12.1205854178959	10.1372597167818
FBgn0001942	14296.575798303	-0.12039983853291	0.115554273157104	-1.0419332426523	0.297442630581487	1	13351.9930459	13969.6907031703	13430.718075229	12652.2155280043	12634.4982396147	12203.0079746238
FBgn0037647	313.84882992156	-0.129596088324591	0.124401480909616	-1.04175679724222	0.297524448777323	1	239.63326079939	249.601229011528	282.897933644472	249.634666336948	207.262010646019	245.546957584271
FBgn0010194	70.7765726575167	0.324203750989464	0.31129129949854	1.04148028393895	0.297652698970266	1	87.245119223079	96.8771893423737	69.3377288344294	129.891208500526	88.4802735506399	99.1198727863113
FBgn0023216	249.419732145549	0.151466980307735	0.145447099558045	1.04138879886901	0.297695138977502	1	138.428922500619	125.370480325425	130.354930208727	147.142384629502	140.598790847592	149.80617137022
FBgn0020443	1497.87326770783	0.125328419605109	0.120359440589521	1.04128449742912	0.297743529443327	1	1224.92147389203	1063.36961948747	1120.49769796438	1239.04035608705	1262.96500054475	1216.47116601382
FBgn0266124	208.355187020454	-0.168523252891976	0.161868769084997	-1.04111036270057	0.297824330650436	1	168.673897164619	168.680282619663	191.372131583025	156.275360227195	163.627903141594	149.80617137022
FBgn0032474	694.631255896712	-0.131704510427609	0.126505711495361	-1.04109536929831	0.297831288505967	1	539.756470926782	657.625155888819	697.53755207436	564.214936924159	578.151924433633	585.70833919184
FBgn0036733	268.820364173821	0.134851934815498	0.129633465914209	1.0402555687645	0.298221180724333	1	186.122921009235	173.239209176951	145.609230552302	175.556086488992	202.413776478861	180.217950520566
FBgn0039861	151.855730154669	0.18119052863719	0.174332781977507	1.03933710333704	0.298647984644198	1	93.0614605046176	90.0387995064415	94.299311214824	102.492281707446	89.6923320924295	121.647116601382
FBgn0037757	250.450493899723	0.249343818428023	0.239984338801565	1.03900037674624	0.298804561050559	1	211.714822648005	201.732500160002	220.493977693486	271.959717797976	256.956410859393	224.146075959954
FBgn0083985	29.6693004915451	-0.398389362747998	0.383461593876264	-1.03892898039889	0.298837767082895	1	26.7551698950776	19.3754378684747	20.8013186503288	17.2511761289761	7.27235125073752	25.9063303873314
FBgn0034529	180.469046105331	0.190733738329656	0.183613924537745	1.03877600138353	0.298908925040146	1	172.163701933543	165.261087701696	163.637040049253	200.925463149251	175.74848855949	194.860659000362
FBgn0002562	98.2061945771068	-0.749428420946276	0.721485475915686	-1.03872974018656	0.29893044559279	1	197.755603572312	732.847444084074	155.316512589122	144.098059430271	123.629971262538	378.457696093189
FBgn0030761	206.620438022087	0.143419611756113	0.138079752236864	1.03867228491321	0.298957175031756	1	241.959797312006	249.601229011528	266.256878724209	268.915392598745	286.045815862343	281.590547688384
FBgn0024754	577.339432066459	-0.12162522490552	0.117135410403584	-1.03833012140792	0.299116389950815	1	811.961242902789	843.401413098313	847.307046356728	778.332475936744	761.172764243861	760.294478758638
FBgn0015924	1967.49561823949	-0.104033725571723	0.100231167468584	-1.03793788099226	0.299298976171336	1	1958.9437436222	2068.61292536951	2231.28811389194	1960.54542830481	1953.83836936481	1906.93118894574
FBgn0028956	35.9354131465497	-0.34800170155794	0.335344683867976	-1.03774330800171	0.299389576646994	1	20.938828613539	28.4932909830511	20.8013186503288	20.2955013282071	15.7567610432646	19.1481572428101
FBgn0025720	514.834470987107	0.126063506088122	0.121492424517451	1.03762441640972	0.299444946032603	1	501.368618468627	493.503799826445	450.695237423791	557.111511459286	519.973114427733	501.231174885324
FBgn0029874	143.663890825785	-0.17973101346496	0.173276749817113	-1.03724829588886	0.299620155318277	1	95.3879970172331	102.575847538984	113.713875288464	86.2558806448803	110.297327302852	78.8453533527476
FBgn0035106	789.677308627861	0.243806797613883	0.235067979395407	1.03717570653797	0.29965397769135	1	1041.12508939541	989.287062931534	852.854064663482	1057.39561919959	1150.24355615832	1207.46026848779
FBgn0025866	653.881825346184	-0.0988687398460031	0.0953460162390645	-1.03694673092692	0.299760683559948	1	742.165147524326	686.11844687187	660.095178503768	627.130991041601	664.208080900694	661.174605972327
FBgn0040299	215.841877514249	0.188687748191926	0.18198836977841	1.03681212388282	0.299823424169818	1	189.612725778158	137.907528357967	128.968175632039	174.541311422581	157.567610432646	189.228848046594
FBgn0051278	49.7748205742616	0.267321812969711	0.257839329677411	1.03677671402638	0.29983993022882	1	36.0613159455393	31.9124859010172	29.1218461104604	31.4580270587211	52.1185172969523	34.9172279133597
FBgn0034793	229.675654942702	-0.173258898639308	0.167175858986153	-1.03638706982004	0.300021600195274	1	144.245263782157	148.165113111866	202.466168196534	140.038959164629	153.931434807278	143.047998225699
FBgn0037297	182.912545576455	-0.165045088765042	0.159256711388294	-1.03634620686493	0.300040656626702	1	152.388141576311	157.282966226442	203.852922773223	151.201484895143	151.507317723698	153.185257942481
FBgn0027841	133.816314693442	0.214609104010133	0.207116516156813	1.03617571400075	0.300120174649828	1	65.1430223532323	61.5455085233904	63.7907105276751	74.0785798479561	65.4511612566377	81.0980777342547
FBgn0050169	300.807531704768	0.168618869455748	0.162748281109233	1.03607158432951	0.300168747731407	1	184.959652752928	144.7459181939	138.675457668859	167.437885957709	178.172605643069	182.470674902073
FBgn0286827	120.841691881158	0.173636999504539	0.167637299212174	1.03578976946396	0.300300231421489	1	214.041359160621	214.269548192544	183.051604122894	248.619891270537	246.047883983286	195.987021191116
FBgn0259818	89.3718204651624	0.261826059050042	0.252800464593874	1.03570244410218	0.300340981777746	1	194.265798803389	181.217330652205	140.062212245547	210.058438746944	174.536430017701	234.283335676736
FBgn0036998	108.290908923835	0.220100911658437	0.212579286483317	1.03538268144347	0.300490230393428	1	53.5103397901551	36.4714124583054	58.2436922209207	58.8569538518007	58.1788100059002	54.0653851561698
FBgn0262353	148.371084167686	-0.166937017676311	0.161236870618102	-1.03535262769835	0.300504260462822	1	272.204771976007	279.234251633901	288.444951951226	275.004042997207	218.170537522126	253.431492919546
FBgn0267431	1288.62365058439	0.232911453463831	0.224991981650796	1.03519890688961	0.300576029182142	1	3839.94851407178	3558.24217796342	2175.8179308244	3530.40245604163	4002.21730498922	3721.50067824969
FBgn0029503	190.449103973986	0.171071251808777	0.165260088508014	1.03516374312289	0.300592447943355	1	122.143166912311	84.3401413098313	113.713875288464	116.699132637191	124.842029804328	118.268030029121
FBgn0039670	47.1355288566024	-0.594961449146665	0.574990415181742	-1.03473281195237	0.300793708034928	1	12.7959508193849	19.3754378684747	24.9615823803946	8.11820053128286	1.21205854178959	28.1590547688384
FBgn0032752	268.643008864826	-0.181316372704746	0.175240653590731	-1.03467071703695	0.300822715954601	1	285.000722795391	294.050762945087	230.201259730306	229.339165008741	247.259942525076	238.78878443975
FBgn0028939	79.364564722144	-0.281648365220668	0.272303491736567	-1.03431786138513	0.300987589450032	1	125.632971681234	129.929406882713	171.957567509385	149.171934762322	103.024976052115	97.9935105955578
FBgn0027596	647.336445541289	-0.0994678472262756	0.09618737478231	-1.03410502107361	0.301087069206239	1	1200.49284050957	1260.54319309018	1098.30962473736	1121.32644838344	1021.76535072862	1180.42757590971
FBgn0036560	308.266506165909	-0.158493891806624	0.153305085333409	-1.03384627758388	0.301208033209743	1	428.082718321241	557.328771628479	603.238240859536	497.239782541075	432.704899418883	491.093915168542
FBgn0038029	21.7177324657427	-0.359091356076825	0.347342718573574	-1.03382433796655	0.301218291589807	1	63.9797540969246	58.1263136054242	30.5086006871489	42.620552789235	38.7858733372668	38.2963144856203
FBgn0034351	115.123547738499	0.193782538221928	0.18778180312389	1.03195589241455	0.302092780637759	1	72.1226318910787	67.2441667200006	98.4595749448898	92.3445310433425	77.5717466745336	99.1198727863113
FBgn0287775	663.046648838314	0.130230888246317	0.126241928806165	1.0315977383891	0.302260600319814	1	1213.28879132895	1240.02802358238	1055.32023286002	1198.44935343063	1322.35586909244	1322.34921194465
FBgn0262881	111.790555925424	0.84036967022065	0.814905744658353	1.03124769426306	0.302424679884175	1	41.8776572270779	49.0084604908479	148.382739705679	81.1820053128286	252.108176692234	94.6144240232971
FBgn0014417	393.474109067658	-0.147821568244024	0.143359074780972	-1.03112808498429	0.302480759076236	1	471.123643804627	419.421243270512	378.583999435985	389.673625501577	345.436684410032	411.122199625041
FBgn0038975	791.661502369487	0.313028302460115	0.303632680805614	1.03094403945442	0.302567062920168	1	2302.10787923298	2147.25440848273	1324.3506207376	2317.74625168126	2447.14619587318	2409.28872602182
FBgn0036225	38.6054715054666	-0.238393247841341	0.231282300882589	-1.03074574635247	0.302660066157247	1	57.0001445590783	58.1263136054242	49.9231647607892	42.620552789235	50.9064587551627	47.3072120116486
FBgn0260943	1296.89808627687	0.346980633115449	0.337187598998467	1.02904328079108	0.303459337195193	1	4854.31843357212	3787.32823746715	1931.7491253272	4344.25205930274	4765.81418631666	4339.87352097338
FBgn0031948	387.801731516214	0.0970999419436031	0.0943690679846051	1.02893823174606	0.303508701372019	1	720.063050654479	666.743009003396	658.70842392708	709.32777142084	694.509544445434	785.074446955216
FBgn0035953	392.523539211848	0.121228395599747	0.117851113995494	1.02865718863194	0.303640794127904	1	424.592913552318	384.089562451529	416.026373006577	415.043002161836	453.309894629306	464.061222590457
FBgn0030364	619.994353563244	-0.147131116963029	0.143081674847318	-1.02830161248834	0.303807972798217	1	357.12335468647	428.539096385088	396.611808932936	372.422449372601	347.860801493612	346.91955475209
FBgn0034978	205.816918596166	0.251148478371835	0.244279248190133	1.02812040004461	0.303893195664036	1	488.572667649242	503.761384580343	385.517772319428	541.889885463131	536.941934012787	562.054733186015
FBgn0052600	243.324185981806	0.364189227168566	0.354284146664158	1.02795801222739	0.303969578938418	1	860.818509667713	735.126907362718	360.556189939033	749.918774077254	835.108335293026	934.880618325436
FBgn0261953	58.0080667952534	0.357391548098719	0.347713014271391	1.02783483341171	0.304027527758293	1	168.673897164619	141.326723275933	97.0728203682012	172.511761289761	169.688195850542	180.217950520566
FBgn0085419	76.6633118823512	0.235159360148621	0.228908580576104	1.02730688188615	0.30427598286848	1	195.429067059697	199.453036881358	131.741684785416	188.748162352326	198.777600853492	234.283335676736
FBgn0259175	694.368136800711	0.138169237813854	0.134503336622515	1.02725509480577	0.304300361237841	1	1328.45234870342	1132.89324948611	1016.49110471274	1150.75492530934	1293.26646408949	1386.5518568176
FBgn0031490	203.00620510599	-0.334225880358515	0.325384388135447	-1.02717245370539	0.304339266585704	1	196.592335316005	189.195452127459	331.434343828573	173.526536356171	248.472001066865	146.42708479796
FBgn0031774	136.844422434459	-0.207954251813677	0.20252539176267	-1.02680582421669	0.304511906338984	1	102.367606555079	109.414237374916	123.421157325284	95.3888562425736	105.449093135694	88.9826130695295
FBgn0265457	15.492944418123	0.388805455817672	0.378694622442637	1.02669917335984	0.304562138665786	1	34.8980476892316	31.9124859010172	30.5086006871489	38.5614525235936	30.3014635447397	58.5708339191839
FBgn0001108	792.731405116788	0.157356034322942	0.153284658615567	1.02656088185306	0.30462728186202	1	803.818365108635	706.633616379667	712.791852417935	798.627977264951	826.623925500499	854.908902781935
FBgn0032746	269.886425745499	-0.171535571486399	0.167107818097847	-1.02649638681752	0.304657665868924	1	169.837165420927	182.357062291527	167.797303779319	149.171934762322	161.203786058015	152.058895751728
FBgn0032845	191.93495266925	0.158750834224594	0.154704063700729	1.02615813978677	0.304817049060171	1	197.755603572312	213.129816553222	213.560204810043	227.30961487592	239.987591274338	229.777886913722
FBgn0001225	3355.96837358798	0.353262715309161	0.344297253954641	1.02603988632364	0.304872783561497	1	76.7757049163095	88.8990678671194	216.33371396342	78.1376801135975	270.289054819078	138.542549462685
FBgn0029693	279.183184805773	0.132936608725689	0.129583369056561	1.0258770835605	0.304949525831669	1	269.878235463391	276.954788355257	312.019779754932	311.53594538798	296.954342738449	331.15048408154
FBgn0031040	128.125267073268	-0.228352804466737	0.22268060449286	-1.02547235753556	0.30514036188274	1	57.0001445590783	49.0084604908479	59.6304467976093	53.7830785197489	46.0582245880043	40.5490388671274
FBgn0261564	835.671576733056	-0.0957086281278457	0.0933493160128736	-1.02527401609077	0.305233912586495	1	985.288213092639	1055.39149801221	1117.724188811	1046.23309346908	957.526248013774	948.396964614479
FBgn0052250	295.555857255781	-0.134910817709026	0.131601252007477	-1.02514843628813	0.305293154012	1	278.021113257545	227.946327864409	251.002578380635	222.235739543868	243.623766899707	224.146075959954
FBgn0037022	302.36020738672	-0.133522202119189	0.130252615227385	-1.02510189055395	0.30531511358577	1	223.347505211082	193.754378684747	201.079413619845	179.615186754633	209.686127729599	175.712501757552
FBgn0024432	386.084336490548	-0.158356409239533	0.154517054763687	-1.02484744795141	0.305435174278954	1	223.347505211082	248.461497372206	300.925743141424	225.280064743099	244.835825441497	220.766989387693
FBgn0001202	510.453644711641	0.122060344622437	0.119102196590496	1.02483705688579	0.305440078048419	1	546.736080464628	583.542599332887	529.740248295041	591.613863717238	583.000158600792	633.015551203488
FBgn0034419	476.763349303348	-0.119361346626002	0.116497607747831	-1.02458195437258	0.305560482841172	1	442.041937396934	512.87923769492	538.060775755172	434.323728423633	436.341075044251	502.357537076078
FBgn0036192	91.4507081153478	-0.206028554377408	0.201219326514091	-1.02390042719371	0.305882308437066	1	67.4695588658478	76.3620198345769	99.8463295215784	78.1376801135975	70.2993954237961	60.823558300691
FBgn0262869	542.010323946756	0.346140881845056	0.338061175754586	1.02390013012419	0.305882448765965	1	1972.90296269789	1558.01315095323	913.87126603778	1747.44266435863	1992.62424270208	1911.43663770875
FBgn0039140	598.227892645914	-0.106639634994538	0.104180325850325	-1.02360627233731	0.306021281418777	1	599.083151998476	667.882740642718	600.464731706159	600.746839314931	549.062519430683	584.581977001086
FBgn0026061	469.626572345248	0.120118687417698	0.117382439280324	1.02331054077722	0.306161041499555	1	694.471149015709	737.406370641362	554.701830675435	680.91406956135	707.842188405119	774.937187238434
FBgn0052076	180.162366036384	-0.167571240281342	0.163756790538977	-1.02329338361975	0.306169151116431	1	125.632971681234	119.671822128815	120.647648171907	107.566157039498	111.509385844642	107.004408121586
FBgn0029864	137.639664070569	0.309106341487577	0.302107382973672	1.02316712172014	0.306228835290272	1	376.898915043701	328.242712124749	245.45556007388	366.333798974139	420.584314000987	391.974042382231
FBgn0029131	239.06602384643	0.17132490930468	0.167447798930213	1.02315414355541	0.306234970523645	1	190.775994034466	200.59276852068	224.654241423551	222.235739543868	236.35141564897	234.283335676736
FBgn0001085	583.657386799993	0.232244609740458	0.22699208283974	1.02313969207651	0.306241802340126	1	732.859001473864	574.42474621831	388.291281472805	636.263966639294	643.603085690271	714.113628937743
FBgn0050158	156.393497794962	0.332091907989677	0.324691104495133	1.02279336696351	0.30640555487494	1	431.572523090164	421.700706549156	255.1628421107	434.323728423633	500.5801777591	461.80849820895
FBgn0031191	112.960482139539	-0.186860149460183	0.182782960034957	-1.02230617900293	0.306636009648566	1	83.7553144541559	75.2222881952549	84.5920291780039	70.0194795823146	73.9355710491648	69.8344558267193
FBgn0012042	828.88661099157	0.668976843827148	0.654385561443976	1.02229768387764	0.306640029120488	1	351.307013404932	321.404322288816	830.665991436465	422.146427626709	1001.1603555182	966.418759666535
FBgn0035423	1611.37591806776	-0.158087569664031	0.15464605278805	-1.022254152718	0.30666062645379	1	1269.12566763172	1363.11904062916	1438.06449602607	1290.79388447397	1221.7550101239	1134.24672608881
FBgn0037275	16.0631433069433	-0.447770447129909	0.438040588813071	-1.02221223002006	0.306680463588982	1	17.4490238446158	14.8165113111866	30.5086006871489	16.2364010625657	12.1205854178959	16.8954328613031
FBgn0034368	947.085226816181	-0.0953115152521821	0.0932848785666261	-1.02172524332664	0.306910960024355	1	1015.53318775664	1004.10357424272	1041.45268709313	954.903337492146	1006.00858968536	904.468839175091
FBgn0037018	161.506996418865	-0.184240989514723	0.180354708241304	-1.02154798902294	0.306994885012801	1	90.7349239920022	127.649943604069	99.8463295215784	99.447956508215	87.2682150088503	93.4880618325436
FBgn0003249	2012.48538651443	-0.132099874619184	0.12933183156623	-1.0214026432583	0.307063713534884	1	3392.09023539331	3374.74538403257	3498.78179698531	3158.99478173544	3179.22955511409	3028.78793093626
FBgn0035300	53.0054022230134	-0.391750246587066	0.38356149338125	-1.02134925780382	0.307088996795775	1	23.2653651261544	5.69865819661022	16.6410549202631	11.1625257305139	12.1205854178959	11.2636219075354
FBgn0029529	143.458731544623	-0.24644529770085	0.241413145958516	-1.02084456387971	0.307328087107002	1	110.510484349233	108.274505735594	128.968175632039	111.625257305139	79.9958637581128	100.246234977065
FBgn0036740	648.100287467329	-0.178867281762265	0.175218144943139	-1.02082624958911	0.307336765512783	1	535.103397901551	606.337232119327	734.979925644952	588.569538518007	547.850460888894	519.252969937381
FBgn0034371	618.005594449426	0.0938240180821015	0.091910495533643	1.02081941281405	0.307340005227123	1	864.308314436636	846.820608016279	908.324247731026	891.987283374704	905.407730716822	996.830538816881
FBgn0034501	6082.14698859229	-0.139574846136846	0.136733704820572	-1.02077864649395	0.307359323464097	1	11276.722476647	9281.97447063873	9698.96150935999	8600.21868782778	8701.36827150745	10166.5451337414
FBgn0013810	49.8627347284409	0.311521267755269	0.305639983738768	1.01924252169025	0.308087844148455	1	54.6736080464629	22.7946327864409	31.8953552638375	41.6057777228246	48.4823416715835	46.180849820895
FBgn0052278	321.828775180119	-0.175735078220586	0.172543511467154	-1.01849717051829	0.308441744806114	1	350.143745148624	333.941370321359	352.235662478902	299.358644591055	295.742284196659	322.139586555512
FBgn0038460	136.590578448007	0.167037132982856	0.164024770651556	1.01836528909221	0.308504391492811	1	140.755459013234	166.400819341018	162.250285472565	156.275360227195	210.898186271388	161.069793277756
FBgn0034418	607.917526785955	-0.102127920285293	0.100301023871418	-1.01821413524369	0.308576203368427	1	677.022125171093	696.376031625769	658.70842392708	578.421787853904	622.998090479848	693.839109504179
FBgn0033607	394.993116265812	0.150985624809041	0.148347057104827	1.01778645128329	0.308779452171943	1	204.735213110159	206.29142671729	195.532395313091	229.339165008741	213.322303354967	230.904249104475
FBgn0002563	415.553677316081	0.262932309838621	0.258371510802096	1.01765209725471	0.308843319677197	1	1056.24757672741	868.475509163398	776.58256294561	1099.00139692242	946.617721137668	1196.19664658026
FBgn0264694	500.870938798735	0.161428069223504	0.158694722126548	1.01722393196401	0.309046913695601	1	168.673897164619	162.981624423052	177.504585816139	204.984563414892	204.83789356244	158.817068896249
FBgn0039404	92.3290051229242	0.238145299480479	0.234270351921645	1.01654049488998	0.309372074069127	1	27.9184381513853	49.0084604908479	47.149655607412	51.7535283869282	54.5426343805314	39.4226766763738
FBgn0030944	351.847342545373	-0.135361120183671	0.133162360776971	-1.01651186862317	0.309385698582505	1	253.592479875083	243.902570814917	267.643633300898	231.368715141561	252.108176692234	212.882454052419
FBgn0262993	15.4278429259783	0.415557811406942	0.408953402476305	1.01614953901996	0.309558181620545	1	10.4694143067695	11.3973163932204	15.2543003435745	15.2216259961554	18.1808781268438	15.7690706705495
FBgn0000244	658.345475428125	-0.102075990507242	0.100500846251851	-1.01567294519534	0.309785155610487	1	1174.9009388708	1096.42183702781	1088.60234270054	1041.15921813703	1025.40152635399	1064.41227026209
FBgn0029894	111.979237186307	0.225050545090042	0.221579350378333	1.01566569585921	0.30978860889724	1	108.183947836618	133.348601800679	116.487384441841	128.876433434115	156.355551890857	134.037100699671
FBgn0036623	640.459832204202	0.104118623312308	0.102547018454388	1.01532570016767	0.309950597476891	1	756.124366600018	805.790269000685	750.234225988526	832.115554456493	816.927457166182	836.887107729878
FBgn0031992	305.233885545102	-0.173992224386767	0.171413388620035	-1.01504454107986	0.310084596015074	1	187.286189265543	227.946327864409	285.671442797849	208.028888614123	207.262010646019	203.87155652639
FBgn0035518	189.560301162369	0.169246963583108	0.166742337398704	1.01502093723452	0.310095847189911	1	108.183947836618	90.0387995064415	97.0728203682012	99.447956508215	116.3576200118	117.141667838368
FBgn0053547	496.112925242565	0.30304532583085	0.298660268538101	1.01468242600267	0.310257233987427	1	1654.16746046958	1449.73864521764	808.477918209447	1551.59107654144	1792.6345833068	1484.54536741316
FBgn0287767	1028.21444953059	0.100935642151524	0.0994788245528664	1.01464449952244	0.310275319066379	1	617.695444099399	681.559520314582	664.255442233834	694.106145424684	683.601017569327	727.629975226785
FBgn0027499	560.937383930822	0.21652316140777	0.213439163885731	1.01444907047935	0.310368519597509	1	528.123788363705	527.695749006106	381.357508589362	546.963760795182	549.062519430683	575.571079475058
FBgn0031378	87.2885184342457	-0.274009475207684	0.270150137536444	-1.01428589933891	0.310446350420997	1	27.9184381513853	34.1919491796613	29.1218461104604	23.3398265274382	25.4532293775813	27.0326925780849
FBgn0025455	339.045247850979	0.228076120493778	0.224868499567909	1.014264429798	0.310456592112804	1	419.939840527087	379.530635894241	353.62241705559	434.323728423633	481.187241090466	435.902167821619
FBgn0000557	1842.68074731299	-0.0863057056138906	0.0851408904513222	-1.013681031011	0.310734978290182	1	3720.13188367209	3992.47993254512	3695.70094687509	3603.46626082318	3570.72446411212	3572.82086907022
FBgn0024947	767.631683832458	-0.0862685943147457	0.0851480495146326	-1.01315995852519	0.310983762839559	1	856.165436642482	931.16074932611	984.595749448898	861.544031382393	902.983613633243	844.771643065153
FBgn0030270	94.545620251169	0.243496004195956	0.240348021036554	1.01309760382393	0.311013542712305	1	120.979898656003	104.855310817628	110.940366135087	120.758232902832	126.054088346117	152.058895751728
FBgn0032256	117.193852577987	0.184499996277287	0.182162972653213	1.01282930109251	0.311141702407792	1	77.9389731726173	78.641483113221	95.6860657915126	86.2558806448803	100.600858968536	99.1198727863113
[truncated: 7,665 more rows]
