# Supplementary material for: Male manipulation impinges on social-dependent tumor suppression in Drosophila melanogaster females
Source: Sci Rep. 2024 Mar 17;14:6411. doi: 10.1038/s41598-024-57003-3 (PMC10944827; doi:10.1038/s41598-024-57003-3)
Supplement: Supplementary file 5 — Supplementary Table S4. [file 41598_2024_57003_MOESM5_ESM.xlsx]

## Sheet: Feuil1
Fig. 1a Fly coating				Fig. 1d social impact in axenic conditions				Fig. 1d social impact in standard conditions
% of GFP+ cells				% of GFP+ cells				% of GFP+ cells
Healthy	Tumorous	Non coated		Heterogenous	Group	Alone		Heterogenous	Group	Alone
5.46793	15.808	3.49493		58.9474	17.4054	34.5316		5.63698	62.8723	49.2339
10.083	11.1111	10.9589		19.8238	16.1074	20.5092		8.4507	29.4406	13.8561
9.37275	32.9308	11.4843		28.8061	41.4761	35.2201		10.6754	14.1927	20.8535
10.0565	34.3434	13.8479		24.8936	26.1984	32.234		55.8824	36.3543	16.5158
19.5652	32.5581	25.3536		23.5984	48.1069	3.62473		52.381	21.7579	3.85078
6.53153	2.36967	4.26487		15.6863	5.20362	40.3952		25.9062	18.982	21.0884
24.3179	55.1616	8.30527		17.0759	8.95522	7.70349		28.6676	19.4792	48.8599
12.5	8.35189	26.776		10.2941	3.77155	11.8261		43.6486	11.8377	24.8152
6.30105	21.659	4.00891		8.67925	18.7082	2.1978		29.3048	7.45273	28.3249
4.84429	34.8811	6.08696		21.688	21.6867	14.5903		34.7588	13.9535	25.7362
22.4157	38.0631	13.1905		25.3347	6.94118	42.3347		36.108	26.8737	21.098
3.02703	31.5305	31.3661		9.28726	5.84112	27.907		17.4419	25.5011	34.5161
28.1628	10.5202	34.0621		69.8936	11.4428	20.9003		10.6077	36.0759	16.975
26.9926	43.5868	16.8455		17.9864	12.3636	27.2051		16.5758	10.4145	12.5793
13.8462	27.9	21.1726		28.6245	12.1212	45.0526		23.2162	14.175	38.5439
8.74704	18.0556	22.7174		25.13	9.5498	52.3268		6.16883	13.8151	21.9388
17.9606	35.3535	3.91937		25.5556	8.67631	39.574		47.8489	23.8462	30.5028
20.1306	2.45614	4.07938		14.5143	4.27928	24.1081		15.5435	40.6283	13.3404
12.8261	15.155	3.02376		6.70732	25.9016	31.7708		24.6486	18.2497	60.3834
22.3947	31.0887	6.51709		23.0435	1.62095	41.3232		34.8812	6.59722	25.7081
14.5665	25	8.32408		44.8827	7.84314	60.7216		29.0391	24.1304	44.1885
26.055	27.0659	6.75057		33.8059	11.6279	39.6588		18.038	15.2125	25.1092
20.2312	11.3831	20.5405		32.6039	19.4495	25.8307		31.5393	47.5108	38.3208
30.6257	16.6667	2.83843		60.2497	32.1759	50.1581		19.4206	21.0296	25.5226
23.6126	26.9107	27.1645		20.5726	5.19774	8.75274		16.9248	11.9792	19.308
14.5558	8.90411	47.1922		36.6212	31.4164	13.0626		50.582	22.6087	13.6415
9.73952	19.3729	12.6667		38.7271	43.717	25.8861		17.0865	16.9297	19.5841
5.46075	12.125	10.0338		19.5931	26.7831	42.3747		26.6172	17.6539	65.9115
12.1005	27.3371	9.80176		17.3006	50	42.6667		18.1624	20.5575	74.375
23.5359	19.5467	13.0337		18.2077	22.3108	35.3879		60.8471	45.4447	63.1191
42.8266	18.6916	8.37927		36.7679	22.9592	28.0186		32.1625	40.3415	17.8017
17.284	19.2612	10.823		44.5161	12.0672	44.2308		28.8913	6.33333	14.175
14.3012	42.1397	12.1111		39.2114	19.6352	33.8182		43.0712	26.1522	27.021
46.3542	42.111	19.8653		14.881	20.8122	31.3767		27.038	1.96721	68.5089
12.8149	6.91892	59.8525		14.881	55.7632	14.5288		30.6681	2.73823	19.1964
22.9773	17.0139	7.7095		18.5816	26.2084	34.6833		10.7182	15.5508	3.82572
29.4438	36.4486	35.847		23.2	29.2503	36.3152		32.2105	24.8683	69.9187
5.78035	29.0837	44.9162		18.0525	18.5404	24.1803		51.9786	5.07559	2.34292
55.9788	17.6471	10.4813		17.7827	14.1026	83.7589		46.0352	12.7273	31.5335
18.0131	9.76948	34.6282		37.3102	41.5193	11.0632		26.7094	23.159	32.0072
11.8093	16.443	40.6217		20.6283	12.6745	20.0906		8.86752	16.4246	11.5756
23.9913	47.7778	39.3424		22.2222	20.383	29.2528		46.3847	16.2839	29.979
22.3439	31.25	4.11111		20.4846	9.17722	24.5528		42.5806	10.3837	44.2391
30.9005	60.6176	4.90868		16.0417	26.4171	14.8728		60.6417	5.63867	34.0611
31.0236	18.931	16.9623		18.3628	35.4255	26.5263		64.3725	9.21248	41.3601
34.8052	17.0621	9.64126		14.1403	34.1438	20.973		7.45016	4.88069	29.817
11.9678	12.9528	22.1627		15.6013	30.5613	20.7158		41.7683	13.9785	40.8117
54.7541	33.7004	24.1733		50.6329	6.08696	55.4622		13.2095	45.1337	26.0274
24.4578	23.0681	11.0199		23.136	38.0851	36.5027		32.4769	24.812	7.56193
12.5708	7.84314	6.88488		20.558	13.9559	24.659		18.3381	9.47255	6.26506
37.7315	22.4236	22.6816		45	36.859	34.202		16.4226	16.1117	23.7037
47.0905	51.1182	33.9367		27.1773	29.6455	16.9248		41.3442	24.1493	27.3878
32.0041	6.43564	21.4058		31.25	33.7416	9.15179		32.5773	24.3243	44.3601
26.4019	47.2767	25.7459		21.2766	26.9149	13.956		26.096	20.9052	18.5225
25.1483	34.5898	14.7702		16.9435	13.2973	58		32.8424	13.8528	59.306
28.0916	16.0576	18.2628		39.0164	22.8381	29.0424			15.1786	36.5672
17.0507	14.4676	24.7154		10.4677	38.913	33.8298			39.5075	43.77
15.5859	8.80682	13.7149		25.4669	21.2155	5.94059			38.9706	16.4733
26.9679	13.6412	12.356		20.2726	18.5885	14.271			5.78947	56.072
58.7673	14.2361	11.1264		29.8661	16.1582	78.6145			59.6491	53.7207
56.973	32.4053	39.2473		9.7137	17.3554	32.4769			23.2731	59.021
28.0311	18.3867	27.991		19.5652	25.3433	17.1254			15.8342	57.3361
21.1382	26.6436	34.3643		48.118	11.7409	32.8267			6.72359	20.7469
20.4327	19.0011	19.0848		22.8306	3.45946	57.7778			15.6613	29.3512
18.2716	13.0618	14.3165		12.8834	36.4506	44.7395			51.5723	74.3697
15.4167	21.7195	25.3559		26.8873	44.5732	6.29515			16.7147	33.3333
46.5293	20.6897	15.9587		9.08163	29.3559	18.4426			20.51	30.9874
24.5924	45.435	26.2876		20.5791	47.079	38.9918			21.802	11.1111
37.6197	25.3468	25.3179		34.7692	8.30721	24.5128			22.6537	38.8776
22.2595	9.19913	20.1794		19.5097	31.746	21.4724			29.638	42.9752
31.0461	28.2586	16.0981		16.9087	16.2338	28.1543			17.1095	31.0976
60.4478	34.5475	28.4492		79.375	19.4444	22.8205			21.6216	18.7845
28.3391	19.3439	14.319		22.8751	16.397	19.5084			4.7046	43.3809
29.0144	52.649	37.594		53.4359	19.9786	69.4387			12.6424	66.0513
21.9479	25.6356	30.4211		19.7699	13.7446	24.1903			2.39913	7.07692
31.8907	46.7689	40.2597		12.2867	29.1045	40.2229			9.60118	14.0513
12.0868	8.72928	20.2629		45.0605	11.9914	22.6815			51.9829	51.0204
34.4207	11.8545	26.0776		29.4715	28.1352	27.0434			7.71812	32.0697
16.1148	12.4714	20.4927		26.9939	22.8033	22.0455			8.83576	32.1792
16.2192	35.1732	19.3096		54.7112	17.7508	20.4819			37.9415	41.5902
49.3421	21.1155	24.1989		48.3249	22.9145	21.5365			15.6282	11.7647
50.8021	19.7304	22.8604		17.2922	18.29	16.3711			9.05797	8.62423
20.7014	31.6027	21.2555		15.8664	16.7217	21.7304			36.6972	14.9269
38.4368	36.4821	22.6623		24.8563	24.4831	28.2974			8.81148	41.5094
28.1938	31.931	24.7228		24.4127	14.238	14.1424			4.49898
12.6808	37.8316	14.4124		30.9524	9.97783	18.9325
59.6195	14.3829	39.069		24.0286	12.551	17.1226
30.9843	43.379	26.1453		18.6047	22.7088	24.7423
14.728	10.2481	36.1381		31.9598	19.9794	14.5127
9.98902	21.6649	30.5732		17.1748	14.6217
20.2109	16.647	20.8198		12.2905	25.4842
13.2102	36.2319	19.849		21.9938	31.5306
17.4638	19.5225	19.6388		23.9509	59.3496
35.5895	28.0639	16.1957			2.16509
13.253	36.8034	23.3957			18.2099
19.8312	12.8799	23.2787			12.8283
41.8356	11.5385	23.6066			11.9877
32.8333	23.6583	16.5746			10.9278
13.4036	14.9742	23.9155			18.3486
16.3333	13.6515	8.62262			29.595
19.4833		14.3907			20.3874
35.5011		14.8603			9.9182
12.6246		30.0205			13.6223
		17.4302			13.8254
		26.9042			21.4953
		11.6842			7.32714
					15.5208
					7.79626
					56.8807
					13.9369
					7.48718
