# Supplementary material for: Male manipulation impinges on social-dependent tumor suppression in Drosophila melanogaster females
Source: Sci Rep. 2024 Mar 17;14:6411. doi: 10.1038/s41598-024-57003-3 (PMC10944827; doi:10.1038/s41598-024-57003-3)
Supplement: Supplementary file 6 — Supplementary Table S5. [file 41598_2024_57003_MOESM6_ESM.xlsx]

## Sheet: Feuil1
Fig. 3a social impact in mated females				Fig. 3b social impact in virgin females				Fig. 3a social impact in SP0-mated females
% of GFP+ cells				% of GFP+ cells				% of GFP+ cells
Heterogenous	Group	Alone		Heterogenous	Group	Alone		Heterogenous	Group	Alone
16.499	18.6598	15.534		6.98381	9.58628	16.129		14.5918	32.3923	13.1429
21.0579	10.83	16.9057		36.9543	3.83065	19.4915		8.70388	23.4954	11.3874
33.6873	17.5635	11.0436		32.2014	6.08175	10.4		30.8779	16.9811	24.9633
18.4397	23.1579	13.0785		7.44811	10.3166	12.3583		19.3516	33.125	14.4393
20.8835	14.1988	27.51		23.6971	9.34292	9.82776		24.6421	14.556	18.4862
27.7836	14.4685	12.3992		15.2834	13.5504	31.4793		5.66229	4.01284	33.5025
29.4416	12.2613	16.1323		4.36105	5.43338	5.9126		5.46006	2.25904	46.2173
13.3468	9.97984	39.7397		5.88235	7.50507	4.49799		13.0214	15.8683	21.4724
16.4149	8.17084	16.7854		20.7951	8.64745	26.5759		4.4335	8	20.6107
4.111	25.2485	20.8669		25.2041	6.86047	6.66004		19.086	9.5092	61.7555
7.79626	21.2851	13.9959		20.2929	9.17073	2.09581		6.3979	17.3529	21.9585
17.5758	34.7124	21.9067		30.1688	15.8896	33.75		19.3548	33.4959	7.62987
24.6479	25	24.1099		28.5276	11.1006	6.64273		58.3333	12.6193	10.6489
26.8168	33.8028	20.804		23.7645	4.21245	5.98205		7.26539	12.0812	6.03175
20.3647	24.3902	39.0071		32.5253	11.7886	21.5369		39.4504	3.04569	2.6362
11.8367	19.3286	39.9798		15.2525	10.5852	10.9879		64.0625	22.9965	7.69231
18.0924	28.8889	18.3838		21.3786	5.52536	16.448		37.7181	8.10105	4.6131
41.6331	20.7452	23.0847		69.9125	23.774	11.0664		29.2105	5.98555	24.1265
22.9062	13.4809	29.798		12.8283	15.2174	8.01603		2.95139	13.7896	36.7698
30.9309	21.6162	22.4346		17.3869	21.6106	4.4		7.05882	10.3764	19.9426
12.0619	45.9677	31.8497		58.1568	17.4002	28.2412		7.96569	7.02479	22.549
65.1561	20.8249	16.7846		21.209	7.28008	10.5528		24.0789	3.66109	18.4318
34.8485	88.7972	10.9731		23.9394	40.1831	9.62889		9.23077	16.7343	20.9466
6.78825	30.2938	49.5976		9.09091	14.834	14.5		6	6.70103	17.0478
15.3535	10.4628	33.6724		28.9954	8.71327	3.30993		23.0303	14.3149	24.0493
33.0964	29.7131	21.3849		22.9211	5.84677	16.4164		16.6667	16.565	5.97771
25.1649	10.6491	17.8788		15.6504	20.1807	14.5		11.1446	29.6794	10.8629
13.6499	14.0496	12.7461		27.2449	22.7181	20.4614		20.4431	19.5652	44.6123
36.2626	23.1481	31.4227		15.6455	6.54582	12.0202		14.4724	12.2222	6.42115
29.4472	31.269	21.8402		60.3502	15.9919	20.402		31.8458	13.7652	8.46395
39.0342	24.5168	7.58342		29.4922	10.1626	14.7442		21.7085	25.3608	7.36196
26.3425	30.4569	16.4315		28.1534	11.6803	11.747		15.9799	6.35593	18.2851
3.32326	14.8036	36.4372		21.2389	22.1436	12.3123		32.0963	14.9646	37.2569
25.6539	29.7269	28.9929		11.0694	11.2821	7.90514		57.3724	22.7874	3.56053
12.3607	39.2237	28.3988		13.8249	12.1844	20.2206		19.2387	23.5533	22.5776
14.2276	4.58716	31.3387		17.2553	1.91638	4.58248		29.1793	14.1844	7.89809
34.3955	22.359	43.5045		19.2982	1.001	10.0219		18.2663	38.7195	22.6168
37.3041	20.5645	14.0704		14.1709	10.9201	1.81818		17.5926	34.6076	67.3058
40.7269	10.0719	21.7523		25.0522	17.9226	22.1221		24.4054	7.32452	18.7751
27.0221	28.9315	23.5056		17.002	35.9756	59.797		10.3053	7.44139	14.0816
30.4217	27.6813	24.1135		13.1767	34.558	10.7362		18.4615	9.20121	4.96304
37.7551	15.0254	15.1515		21.4629	12.0482	24.1021		13.5992	15.5419	26.5849
17.5365	22.1212	28.2828		13.1179	2.54065	8.85046		22.7503	23.5294	7.02106
26.8342	29.8477	12.8601		3.83065	40.5911	18.6924		9.46083	11.8731	25.7345
20.1213	13.6226	11.3971		25.072	18.908	15.1718		22.3565	20.4893	23.3098
19.0863	19.659	34.7826		11.9072	5.04634	6.86869		5.80762	18.2096	3.4291
35.7215	20.7452	13.3745		23.0415	12.8803	13.0922		26.3473	14.0513	8.46075
11.1449	27.3652	22.548		16.0748	18.1818	31.5682		15.5789	9.41884	8.08898
16.2743	11.2805	35.0913		16.8871	43.162	9.54315		7.24522	22.6105	32.0381
38.1339	32.551	23.1621		6.14115	10.7833	12.551		23.873	23.8384	17.3428
43.557	2.76356	33.6041		18.8508	12.4103	7.60649		38.0252	13.5955	20.9184
27.7168	16.6497	21.2183		19.0427	27.4309	36.0856		36.5904	2.4838	14.1709
24.4734	31.1783	30.9572		21.8971	28.817	26.9805		10.5919	15	13.5354
24.1556	15.519	25.8691		13.2632	12.6866	33.6354		18.5376	36.4879	9.31864
21.3563	17.765	41.5911		40.0202	15.2525	21.2487		15.5488	13.2368	31.5736
22.177	20.6862	10.7071		26.0385	12.8643	11.846		23.7354	0.610376	23.2333
18.541	22.0322	6.42202		17.4847	23.1649	16.6498		29.7546	28.4842	18.8601
26.0246	12.4236	37.2847		32.3263	7.45659	21.2355		7.01933	11.4616	17.9167
19.6659	20.2442	32.3499		14.8893	25.1282	11.5258		7.8252	6.18212	9.23567
30	13.7436	21.3347		24.3461	15.2679	9.85772		14.6492	3.99698	11.3225
35.6495	26.6327	17.6768		10.6227	13.5217	20.8333		25.9356	27.1605	13.2114
35.0987	21.4141	20.203		23.8911	20.0395	17.3832		12.5137	20.2775	17.9461
32.0207	5.62372	15.71		36.6566	9.55734	11.9478		47.7903	20.0832	19.1057
26.5182	28.9738	29.9189		6.28803	18.4211	18.2741		24.7668	32.9437	6.88592
20.0192	29.2906	18.6047		10.2538	32.9556	6.63984		10.6806	16.3848	11.7769
30.1141	20.2213	29.1803		6.41548	14.2424	20.0405		17.7386	11.7899	15.9184
35.3893	14.8744	21.7172		15.3611	2.27273	8.19838		27.0588	18.9355	15.3292
29.4652	31.003	16.3655		38.4848	6.42202	14.9068		19.7556	18.2657	11.4372
23.4469	13.0916	23.7651		7.33668	12.3246	16.1389		21.8782	18.0698	26.6878
41.2651	26.337	22.863		22.1042	3.93627	11.334		8.80567	17.7126	24.3299
43.0584	29.2806	14.1129		38.6431	6.37007	16.3142		8.27517	8.21501	11.474
62.4186	21.7701	20.7661		16.2883	9.39734	19.3581		25.2803	22.0739	17.0256
30.5584	22.1774	22.8283		25.2465	12.5128	21.9029		22.6943	16.6318	15.0924
22.4	6.02041	23.1313		10.574	24.8614	14.3742		16.6151	16.7004	16.4271
28.7839	14.0914	8.33333		27.2644	30.3093	16.4493		61.8515	13.8776	18.6667
24.4168	29.4597	31.6923		12.8514	29.708	27.5378		19.0031	18.357	34.3238
24.9307	12.1827	28.2103		7.04501	40.8805	19.674		15.7085	17.8862	27.7157
10.0741	22.8977	12.4874		18.3126	28.6579	30.0601		21.3265	5.01969	19.4303
10.5556	15.2371	20.3647		2.67765	63.6917	15.7948		25.5773	22.6667	30.7692
16.8848	30.0805	7.22892		13.3874	15.7315	27.0655		26.0556	25.1816	7.00309
18.9632	19.8589	13.7791		46.0141	2.41206	26.009		32.9027	19.4532	30.581
27.0492	9.30233	29.0744		30.9735	23.3233	15.9509		20.4589	14.2566	34.0081
21.4876	22.6047	5.92369		13.5952	21.9316	29.596		23.3475	8.17805	7.82347
21.1934	38.4693	18.7247		29.9694	13.4208	9.67742		5.50459	24.8996	44.1206
32.4635	5.44904	9.24623		18.8698	23.4879	24.6575		14.4444	9.05433	24.2126
9.44162	8.44221	3.32997		20.5823	28.4561	19.8783		28.3629	0.922131	8.03758
16.6935	18.6047	27.0707		17.7419	18.0344	35.3893		36.7708	15.0313	6.34249
20.122	23.6895	24.8497		20.0493	15.4158	17.2802		12.605	17.735	10.2455
36.3914	19.0716	3.45178		32.7551	17.3737	21.1694		14.5062	16.8623	26.599
6.5678	19.818	18.668		24.8198	13.3065	16.1258		31.2115	8.29787	27.0701
36.3839	6.53924	35.851		34.5842	15.5086	45.4545		13.822	12.2471	32.3469
20.6269	21.3065	30.7615		29.1105	21.7742	23.108		20.8377	6.95021	13.3333
24.3391	18.908	26.2892		37.037	19.6755	19.1919		35	18.361	14.5161
18.7197	23.5116	43.2712		28.0738	20.8669	19.2698		11.8874	13.8398	14.7558
47.6856	28.7298	37.4088		15.4545	12.4744	9.71944		36.2213	13.7555	7.80437
22.0544	28.0364	26.3791		17.1	15.3552	22.6721		8.82957	34.9896	19.3347
6.03538	17.619	23.1707		21.8876	19.12	55.2764		23.5415	21.2474	12.578
9.04472	32.6188	24.924		16.0121	16.1115	34.6038		25.4565	9.35857	10.1135
18.3653	23.4343	27.3461		43.0328	30.5419	31.7172		14.2415	6.91824	44.683
2.96524	25.4783	34.3373		22.5532	10.1101	23.1943		25.027	18.4536	32.1839
	15.8586	12.2736			2.11907	47.5698		10.5769	7.37279	25.6813
	42.6559	11.6116			18.3283	19.7065		28.4974	4.19727	11.1452
	37.69	17.5227			20.0201	28.0847		14.4515	20.6533	10.8274
	35.474	13.755			4.5929	20.3918		29.1533	8.99582	34.8887
	35.9517	28.8049			8.46774	28.629		11.8607	15.5943	33.4059
	5.3553	6.74956			7.07071	13.4235		45.5319	21.047	27.2628
	12.9032	20.0811			9.375	13.0567		8.4449	11.9874
	51.6779	14.1553			20.7101	32.2906		24.0546	17.149
	17.5101	18.5035			8.25147	32.6376		22.8448
	26.4113	6.78825			23.541	5.62771		44.6219
	20.7392	29.845			18.4411	16.5331		22.0481
					7.05882	35.9676
					22.1	37.6415
					7.02754	21.085
						17.8473
						75.6269
						16.0121
						13.6502
						14.1079
						12.5714
						2.96221
						13.7374
						8.98438
						15.0602
						36.8286
						16.3284
						40.8862
						27.2358
						10.8607
						13.9344
						27.2034
						62.2658
						2.997
						16.92
						6.96721
						12.1212
						29.9797
						10.7843
						42.3645
						15.0353
						15.7258
						51.7328
